# Supplementary material for: (POP)Rh pincer hydride complexes: unusual reactivity and selectivity in oxidative addition and olefin insertion reactions
Source: Royal Society of Chemistry journal article supplement (doi:10.1039/c3sc50380a), 2013-01-01
Supplement: c3sc50380a.pdf [file c3sc50380a.pdf]

## Supporting Information

### Part II: Crystal Structure Data

#### **(POP)Rh pincer hydride complexes: unusual reactivity and selectivity in oxidative addition and olefin insertion reactions**

Michael C. Haibach, David Y. Wang, Thomas J. Emge, Karsten Krogh-Jespersen\*

and Alan S. Goldman\*

*Department of Chemistry and Chemical Biology, Rutgers, The State University of New Jersey,*

*New Brunswick, NJ 08903*

[kroghjes@rutgers.edu](mailto:kroghjes@rutgers.edu), [alan.goldman@rutgers.edu](mailto:alan.goldman@rutgers.edu)

## Table of Contents

|                                                                                                                                    |           |
|------------------------------------------------------------------------------------------------------------------------------------|-----------|
| Figure A1: ORTEP diagram of $(\mu_2\text{-}^t\text{Bu}\text{furPOP})[\text{Rh}(\text{NBD})\text{Cl}]_2$                            | S3        |
| Tables A1-A7: X-ray structure data for $(\mu_2\text{-}^t\text{Bu}\text{furPOP})[\text{Rh}(\text{NBD})\text{Cl}]_2$                 | S4-S22    |
| Figure B1: ORTEP diagram of $(^t\text{Bu}\text{xanPOP})\text{RhCl}$                                                                | S23       |
| Tables B1-B7: X-ray structure data for $(^t\text{Bu}\text{xanPOP})\text{RhCl}$                                                     | S24-S37   |
| Figure C1: ORTEP diagram of $(^t\text{Bu}\text{furPOP})\text{RhCl}$                                                                | S38       |
| Tables C1-C7: X-ray structure data for $(^t\text{Bu}\text{furPOP})\text{RhCl}$                                                     | S39-S58   |
| Figure D1: ORTEP diagram of <i>cis</i> - $(^t\text{Bu}\text{xanPOP})\text{Rh}(\text{H})_2\text{Cl}$                                | S59       |
| Tables D1-D7: X-ray structure data for <i>cis</i> - $(^t\text{Bu}\text{xanPOP})\text{Rh}(\text{H})_2\text{Cl}$                     | S60-S83   |
| Figure E1: ORTEP diagram of <i>trans</i> - $[(^t\text{Bu}\text{xanPOP})\text{Rh}(\text{H})_2(\text{OH}_2)]\text{SbF}_6$            | S84       |
| Tables E1-E7: X-ray structure data for <i>trans</i> - $[(^t\text{Bu}\text{xanPOP})\text{Rh}(\text{H})_2(\text{OH}_2)]\text{SbF}_6$ | S85-S93   |
| Figure F1: ORTEP diagram of $[(^t\text{Bu}\text{xanPOP})\text{Rh}(\text{H})_2]\text{SbF}_6$                                        | S94       |
| Tables F1-F7: X-ray structure data for $[(^t\text{Bu}\text{xanPOP})\text{Rh}(\text{H})_2]\text{SbF}_6$                             | S95-104   |
| Figure G1: ORTEP diagram of $(^t\text{Bu}\text{xanPOP})\text{Rh}(\text{H})$                                                        | S105      |
| Tables G1-G7: X-ray structure data for $(^t\text{Bu}\text{xanPOP})\text{Rh}(\text{H})$                                             | S106-S119 |

Figure A1: ORTEP diagram of  $(\mu_2\text{-}^t\text{BuPOP})[\text{Rh}(\text{NBD})\text{Cl}]_2$

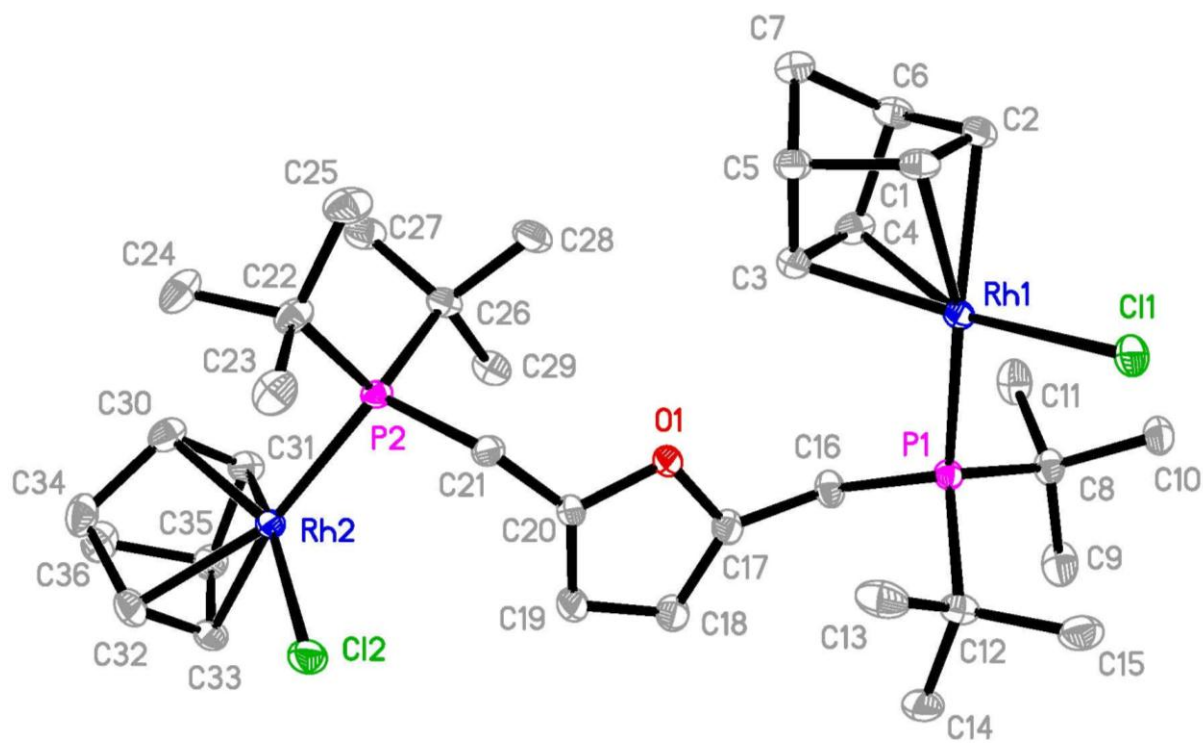

Table A2. Crystal data and structure refinement for  $(\mu_2\text{-}^{\text{tBu}}\text{furPOP})[\text{Rh}(\text{NBD})\text{Cl}]_2$ .

|                                   |                                                                                               |                 |
|-----------------------------------|-----------------------------------------------------------------------------------------------|-----------------|
| Identification code               | mh301                                                                                         |                 |
| Empirical formula                 | C <sub>36</sub> H <sub>58</sub> Cl <sub>2</sub> O <sub>2</sub> P <sub>2</sub> Rh <sub>2</sub> |                 |
| Formula weight                    | 845.48                                                                                        |                 |
| Temperature                       | 100(2) K                                                                                      |                 |
| Wavelength                        | 0.71073 Å                                                                                     |                 |
| Crystal system                    | Triclinic                                                                                     |                 |
| Space group                       | P-1                                                                                           |                 |
| Unit cell dimensions              | a = 9.2229(4) Å                                                                               | α = 84.914(1)°. |
|                                   | b = 13.3906(6) Å                                                                              | β = 82.020(1)°. |
|                                   | c = 15.3427(7) Å                                                                              | γ = 86.259(1)°. |
| Volume                            | 1866.40(14) Å <sup>3</sup>                                                                    |                 |
| Z                                 | 2                                                                                             |                 |
| Density (calculated)              | 1.504 Mg/m <sup>3</sup>                                                                       |                 |
| Absorption coefficient            | 1.140 mm <sup>-1</sup>                                                                        |                 |
| F(000)                            | 872                                                                                           |                 |
| Crystal size                      | 0.29 x 0.23 x 0.13 mm <sup>3</sup>                                                            |                 |
| Theta range for data collection   | 1.95 to 30.03°.                                                                               |                 |
| Index ranges                      | -12 ≤ h ≤ 12, -18 ≤ k ≤ 18, -21 ≤ l ≤ 21                                                      |                 |
| Reflections collected             | 21607                                                                                         |                 |
| Independent reflections           | 10788 [R(int) = 0.0147]                                                                       |                 |
| Completeness to theta = 30.03°    | 98.9 %                                                                                        |                 |
| Absorption correction             | Semi-empirical from equivalents                                                               |                 |
| Max. and min. transmission        | 0.746 and 0.673                                                                               |                 |
| Refinement method                 | Full-matrix least-squares on F <sup>2</sup>                                                   |                 |
| Data / restraints / parameters    | 10788 / 0 / 424                                                                               |                 |
| Goodness-of-fit on F <sup>2</sup> | 1.002                                                                                         |                 |
| Final R indices [I > 2σ(I)]       | R1 = 0.0236, wR2 = 0.0552                                                                     |                 |
| R indices (all data)              | R1 = 0.0265, wR2 = 0.0565                                                                     |                 |
| Largest diff. peak and hole       | 0.941 and -0.347 e.Å <sup>-3</sup>                                                            |                 |

Table A3. Atomic coordinates ( $\times 10^4$ ) and equivalent isotropic displacement parameters ( $\text{\AA}^2 \times 10^3$ )

for  $(\mu_2\text{-}^i\text{Bu}\text{furPOP})[\text{Rh}(\text{NBD})\text{Cl}]_2$ .  $U(\text{eq})$  is defined as one third of the trace of the orthogonalized  $U^{ij}$  tensor.

|       | x        | y       | z       | U(eq) |
|-------|----------|---------|---------|-------|
| Rh(1) | 7310(1)  | 4886(1) | 6031(1) | 13(1) |
| Rh(2) | 12383(1) | 9440(1) | 8484(1) | 15(1) |
| Cl(1) | 7355(1)  | 3169(1) | 5757(1) | 20(1) |
| Cl(2) | 13697(1) | 7892(1) | 8734(1) | 24(1) |
| P(1)  | 6866(1)  | 4683(1) | 7587(1) | 13(1) |
| P(2)  | 11518(1) | 8922(1) | 7222(1) | 14(1) |
| O(1)  | 9188(1)  | 6678(1) | 7617(1) | 17(1) |
| C(1)  | 8240(2)  | 5315(1) | 4642(1) | 18(1) |
| C(2)  | 6736(2)  | 5425(1) | 4716(1) | 19(1) |
| C(3)  | 8219(2)  | 6302(1) | 5842(1) | 20(1) |
| C(4)  | 6680(2)  | 6421(1) | 5918(1) | 20(1) |
| C(5)  | 8775(2)  | 6321(1) | 4848(1) | 19(1) |
| C(6)  | 6299(2)  | 6501(1) | 4969(1) | 20(1) |
| C(7)  | 7619(2)  | 7064(1) | 4475(1) | 22(1) |
| C(8)  | 4877(2)  | 4394(1) | 7946(1) | 18(1) |
| C(9)  | 4495(2)  | 4090(2) | 8937(1) | 28(1) |
| C(10) | 4461(2)  | 3562(1) | 7414(1) | 21(1) |
| C(11) | 3931(2)  | 5344(1) | 7706(1) | 26(1) |
| C(12) | 8132(2)  | 3729(1) | 8126(1) | 20(1) |
| C(13) | 9672(2)  | 3931(2) | 7643(1) | 29(1) |
| C(14) | 8137(2)  | 3789(1) | 9120(1) | 26(1) |
| C(15) | 7779(2)  | 2655(1) | 7984(1) | 28(1) |
| C(16) | 6924(2)  | 5838(1) | 8188(1) | 19(1) |
| C(17) | 8338(2)  | 6234(1) | 8336(1) | 19(1) |

|       |          |          |         |       |
|-------|----------|----------|---------|-------|
| C(18) | 8970(2)  | 6319(1)  | 9070(1) | 23(1) |
| C(19) | 10293(2) | 6829(1)  | 8800(1) | 22(1) |
| C(20) | 10381(2) | 7037(1)  | 7918(1) | 17(1) |
| C(21) | 11466(2) | 7535(1)  | 7234(1) | 16(1) |
| C(22) | 12939(2) | 9183(1)  | 6223(1) | 20(1) |
| C(23) | 14241(2) | 8420(1)  | 6297(1) | 26(1) |
| C(24) | 13511(2) | 10232(1) | 6236(1) | 27(1) |
| C(25) | 12395(2) | 9096(1)  | 5333(1) | 26(1) |
| C(26) | 9631(2)  | 9413(1)  | 6985(1) | 18(1) |
| C(27) | 9663(2)  | 10539(1) | 6690(1) | 24(1) |
| C(28) | 9002(2)  | 8859(1)  | 6298(1) | 24(1) |
| C(29) | 8578(2)  | 9271(1)  | 7854(1) | 23(1) |
| C(30) | 12306(2) | 11020(1) | 8238(1) | 23(1) |
| C(31) | 11048(2) | 10746(1) | 8811(1) | 21(1) |
| C(32) | 13780(2) | 10163(1) | 9241(1) | 24(1) |
| C(33) | 12537(2) | 9900(1)  | 9805(1) | 22(1) |
| C(34) | 13452(2) | 11228(1) | 8834(1) | 27(1) |
| C(35) | 11416(2) | 10799(1) | 9752(1) | 23(1) |
| C(36) | 12450(2) | 11681(1) | 9607(1) | 29(1) |

---

Table A4. Bond lengths [Å] and angles [°] for  $(\mu_2\text{-}^t\text{BuPOP})[\text{Rh}(\text{NBD})\text{Cl}]_2$ .

|             |            |              |          |
|-------------|------------|--------------|----------|
| Rh(1)-C(4)  | 2.0972(16) | C(4)-C(6)    | 1.539(2) |
| Rh(1)-C(3)  | 2.1034(16) | C(4)-H(4)    | 0.92(2)  |
| Rh(1)-C(2)  | 2.2044(15) | C(5)-C(7)    | 1.544(2) |
| Rh(1)-C(1)  | 2.2244(15) | C(5)-H(5)    | 1.0000   |
| Rh(1)-P(1)  | 2.3590(4)  | C(6)-C(7)    | 1.545(2) |
| Rh(1)-Cl(1) | 2.3715(4)  | C(6)-H(6)    | 1.0000   |
| Rh(2)-C(30) | 2.1146(16) | C(7)-H(7A)   | 0.9900   |
| Rh(2)-C(31) | 2.1281(16) | C(7)-H(7B)   | 0.9900   |
| Rh(2)-C(32) | 2.1743(16) | C(8)-C(10)   | 1.536(2) |
| Rh(2)-C(33) | 2.1961(16) | C(8)-C(9)    | 1.536(2) |
| Rh(2)-Cl(2) | 2.3615(4)  | C(8)-C(11)   | 1.541(2) |
| Rh(2)-P(2)  | 2.3672(4)  | C(9)-H(9A)   | 0.9800   |
| P(1)-C(16)  | 1.8776(16) | C(9)-H(9B)   | 0.9800   |
| P(1)-C(12)  | 1.8881(16) | C(9)-H(9C)   | 0.9800   |
| P(1)-C(8)   | 1.8960(16) | C(10)-H(10A) | 0.9800   |
| P(2)-C(21)  | 1.8603(15) | C(10)-H(10B) | 0.9800   |
| P(2)-C(26)  | 1.8920(16) | C(10)-H(10C) | 0.9800   |
| P(2)-C(22)  | 1.8952(16) | C(11)-H(11A) | 0.9800   |
| O(1)-C(17)  | 1.3738(19) | C(11)-H(11B) | 0.9800   |
| O(1)-C(20)  | 1.3797(18) | C(11)-H(11C) | 0.9800   |
| C(1)-C(2)   | 1.376(2)   | C(12)-C(14)  | 1.535(2) |
| C(1)-C(5)   | 1.537(2)   | C(12)-C(15)  | 1.536(2) |
| C(1)-H(1)   | 0.95(2)    | C(12)-C(13)  | 1.537(2) |
| C(2)-C(6)   | 1.538(2)   | C(13)-H(13A) | 0.9800   |
| C(2)-H(2)   | 0.93(2)    | C(13)-H(13B) | 0.9800   |
| C(3)-C(4)   | 1.408(2)   | C(13)-H(13C) | 0.9800   |
| C(3)-C(5)   | 1.538(2)   | C(14)-H(14A) | 0.9800   |
| C(3)-H(3)   | 0.90(2)    | C(14)-H(14B) | 0.9800   |

|                 |          |                 |          |
|-----------------|----------|-----------------|----------|
| C(14)-H(14C)    | 0.9800   | C(26)-C(28)     | 1.537(2) |
| C(15)-H(15A)    | 0.9800   | C(26)-C(29)     | 1.542(2) |
| C(15)-H(15B)    | 0.9800   | C(27)-H(27A)    | 0.9800   |
| C(15)-H(15C)    | 0.9800   | C(27)-H(27B)    | 0.9800   |
| C(16)-C(17)     | 1.492(2) | C(27)-H(27C)    | 0.9800   |
| C(16)-H(16A)    | 0.9900   | C(28)-H(28A)    | 0.9800   |
| C(16)-H(16B)    | 0.9900   | C(28)-H(28B)    | 0.9800   |
| C(17)-C(18)     | 1.356(2) | C(28)-H(28C)    | 0.9800   |
| C(18)-C(19)     | 1.430(2) | C(29)-H(29A)    | 0.9800   |
| C(18)-H(18)     | 0.9500   | C(29)-H(29B)    | 0.9800   |
| C(19)-C(20)     | 1.349(2) | C(29)-H(29C)    | 0.9800   |
| C(19)-H(19)     | 0.9500   | C(30)-C(31)     | 1.403(2) |
| C(20)-C(21)     | 1.489(2) | C(30)-C(34)     | 1.544(3) |
| C(21)-H(21A)    | 0.9900   | C(30)-H(30)     | 0.92(2)  |
| C(21)-H(21B)    | 0.9900   | C(31)-C(35)     | 1.538(2) |
| C(22)-C(25)     | 1.535(2) | C(31)-H(31)     | 0.93(2)  |
| C(22)-C(23)     | 1.535(2) | C(32)-C(33)     | 1.382(3) |
| C(22)-C(24)     | 1.535(2) | C(32)-C(34)     | 1.535(3) |
| C(23)-H(23A)    | 0.9800   | C(32)-H(32)     | 0.94(2)  |
| C(23)-H(23B)    | 0.9800   | C(33)-C(35)     | 1.539(3) |
| C(23)-H(23C)    | 0.9800   | C(33)-H(33)     | 0.95(2)  |
| C(24)-H(24A)    | 0.9800   | C(34)-C(36)     | 1.542(3) |
| C(24)-H(24B)    | 0.9800   | C(34)-H(34)     | 1.0000   |
| C(24)-H(24C)    | 0.9800   | C(35)-C(36)     | 1.546(2) |
| C(25)-H(25A)    | 0.9800   | C(35)-H(35)     | 1.0000   |
| C(25)-H(25B)    | 0.9800   | C(36)-H(36A)    | 0.9900   |
| C(25)-H(25C)    | 0.9800   | C(36)-H(36B)    | 0.9900   |
| C(26)-C(27)     | 1.536(2) |                 |          |
| C(4)-Rh(1)-C(3) | 39.15(7) | C(3)-Rh(1)-C(2) | 78.65(6) |
| C(4)-Rh(1)-C(2) | 66.57(6) | C(4)-Rh(1)-C(1) | 78.91(6) |



|                   |            |                  |            |
|-------------------|------------|------------------|------------|
| C(3)-Rh(1)-C(1)   | 65.93(6)   | C(8)-P(1)-Rh(1)  | 109.33(5)  |
| C(2)-Rh(1)-C(1)   | 36.19(6)   | C(21)-P(2)-C(26) | 104.42(7)  |
| C(4)-Rh(1)-P(1)   | 96.08(5)   | C(21)-P(2)-C(22) | 100.36(7)  |
| C(3)-Rh(1)-P(1)   | 100.63(4)  | C(26)-P(2)-C(22) | 110.83(7)  |
| C(2)-Rh(1)-P(1)   | 153.76(4)  | C(21)-P(2)-Rh(2) | 112.92(5)  |
| C(1)-Rh(1)-P(1)   | 164.06(4)  | C(26)-P(2)-Rh(2) | 117.94(5)  |
| C(4)-Rh(1)-Cl(1)  | 157.46(5)  | C(22)-P(2)-Rh(2) | 108.93(5)  |
| C(3)-Rh(1)-Cl(1)  | 151.58(5)  | C(17)-O(1)-C(20) | 107.37(12) |
| C(2)-Rh(1)-Cl(1)  | 93.83(4)   | C(2)-C(1)-C(5)   | 106.55(14) |
| C(1)-Rh(1)-Cl(1)  | 91.80(4)   | C(2)-C(1)-Rh(1)  | 71.11(9)   |
| P(1)-Rh(1)-Cl(1)  | 97.923(14) | C(5)-C(1)-Rh(1)  | 94.52(9)   |
| C(30)-Rh(2)-C(31) | 38.62(7)   | C(2)-C(1)-H(1)   | 127.6(13)  |
| C(30)-Rh(2)-C(32) | 66.97(7)   | C(5)-C(1)-H(1)   | 125.2(13)  |
| C(31)-Rh(2)-C(32) | 79.12(7)   | Rh(1)-C(1)-H(1)  | 108.8(12)  |
| C(30)-Rh(2)-C(33) | 79.09(6)   | C(1)-C(2)-C(6)   | 107.03(14) |
| C(31)-Rh(2)-C(33) | 66.12(6)   | C(1)-C(2)-Rh(1)  | 72.70(9)   |
| C(32)-Rh(2)-C(33) | 36.86(7)   | C(6)-C(2)-Rh(1)  | 94.30(9)   |
| C(30)-Rh(2)-Cl(2) | 150.99(5)  | C(1)-C(2)-H(2)   | 127.3(13)  |
| C(31)-Rh(2)-Cl(2) | 157.26(5)  | C(6)-C(2)-H(2)   | 124.8(13)  |
| C(32)-Rh(2)-Cl(2) | 90.14(5)   | Rh(1)-C(2)-H(2)  | 108.8(13)  |
| C(33)-Rh(2)-Cl(2) | 93.32(5)   | C(4)-C(3)-C(5)   | 106.42(13) |
| C(30)-Rh(2)-P(2)  | 102.30(5)  | C(4)-C(3)-Rh(1)  | 70.19(9)   |
| C(31)-Rh(2)-P(2)  | 104.89(5)  | C(5)-C(3)-Rh(1)  | 99.40(10)  |
| C(32)-Rh(2)-P(2)  | 157.93(5)  | C(4)-C(3)-H(3)   | 128.2(13)  |
| C(33)-Rh(2)-P(2)  | 164.02(5)  | C(5)-C(3)-H(3)   | 121.8(13)  |
| Cl(2)-Rh(2)-P(2)  | 92.618(14) | Rh(1)-C(3)-H(3)  | 115.3(13)  |
| C(16)-P(1)-C(12)  | 104.19(7)  | C(3)-C(4)-C(6)   | 105.89(14) |
| C(16)-P(1)-C(8)   | 99.05(7)   | C(3)-C(4)-Rh(1)  | 70.66(9)   |
| C(12)-P(1)-C(8)   | 110.97(7)  | C(6)-C(4)-Rh(1)  | 98.61(10)  |
| C(16)-P(1)-Rh(1)  | 116.66(5)  | C(3)-C(4)-H(4)   | 126.3(13)  |
| C(12)-P(1)-Rh(1)  | 115.41(5)  | C(6)-C(4)-H(4)   | 123.6(13)  |

|                  |            |                     |            |
|------------------|------------|---------------------|------------|
| Rh(1)-C(4)-H(4)  | 116.3(13)  | C(8)-C(10)-H(10A)   | 109.5      |
| C(1)-C(5)-C(3)   | 100.08(12) | C(8)-C(10)-H(10B)   | 109.5      |
| C(1)-C(5)-C(7)   | 100.80(13) | H(10A)-C(10)-H(10B) | 109.5      |
| C(3)-C(5)-C(7)   | 100.47(13) | C(8)-C(10)-H(10C)   | 109.5      |
| C(1)-C(5)-H(5)   | 117.4      | H(10A)-C(10)-H(10C) | 109.5      |
| C(3)-C(5)-H(5)   | 117.4      | H(10B)-C(10)-H(10C) | 109.5      |
| C(7)-C(5)-H(5)   | 117.4      | C(8)-C(11)-H(11A)   | 109.5      |
| C(2)-C(6)-C(4)   | 100.34(12) | C(8)-C(11)-H(11B)   | 109.5      |
| C(2)-C(6)-C(7)   | 100.52(13) | H(11A)-C(11)-H(11B) | 109.5      |
| C(4)-C(6)-C(7)   | 100.53(13) | C(8)-C(11)-H(11C)   | 109.5      |
| C(2)-C(6)-H(6)   | 117.4      | H(11A)-C(11)-H(11C) | 109.5      |
| C(4)-C(6)-H(6)   | 117.4      | H(11B)-C(11)-H(11C) | 109.5      |
| C(7)-C(6)-H(6)   | 117.4      | C(14)-C(12)-C(15)   | 107.70(14) |
| C(5)-C(7)-C(6)   | 94.25(12)  | C(14)-C(12)-C(13)   | 108.90(14) |
| C(5)-C(7)-H(7A)  | 112.9      | C(15)-C(12)-C(13)   | 108.50(15) |
| C(6)-C(7)-H(7A)  | 112.9      | C(14)-C(12)-P(1)    | 115.62(12) |
| C(5)-C(7)-H(7B)  | 112.9      | C(15)-C(12)-P(1)    | 110.98(11) |
| C(6)-C(7)-H(7B)  | 112.9      | C(13)-C(12)-P(1)    | 104.92(11) |
| H(7A)-C(7)-H(7B) | 110.3      | C(12)-C(13)-H(13A)  | 109.5      |
| C(10)-C(8)-C(9)  | 109.26(13) | C(12)-C(13)-H(13B)  | 109.5      |
| C(10)-C(8)-C(11) | 106.87(14) | H(13A)-C(13)-H(13B) | 109.5      |
| C(9)-C(8)-C(11)  | 108.69(14) | C(12)-C(13)-H(13C)  | 109.5      |
| C(10)-C(8)-P(1)  | 109.64(11) | H(13A)-C(13)-H(13C) | 109.5      |
| C(9)-C(8)-P(1)   | 114.61(12) | H(13B)-C(13)-H(13C) | 109.5      |
| C(11)-C(8)-P(1)  | 107.48(11) | C(12)-C(14)-H(14A)  | 109.5      |
| C(8)-C(9)-H(9A)  | 109.5      | C(12)-C(14)-H(14B)  | 109.5      |
| C(8)-C(9)-H(9B)  | 109.5      | H(14A)-C(14)-H(14B) | 109.5      |
| H(9A)-C(9)-H(9B) | 109.5      | C(12)-C(14)-H(14C)  | 109.5      |
| C(8)-C(9)-H(9C)  | 109.5      | H(14A)-C(14)-H(14C) | 109.5      |
| H(9A)-C(9)-H(9C) | 109.5      | H(14B)-C(14)-H(14C) | 109.5      |
| H(9B)-C(9)-H(9C) | 109.5      | C(12)-C(15)-H(15A)  | 109.5      |

|                     |            |                     |            |
|---------------------|------------|---------------------|------------|
| C(12)-C(15)-H(15B)  | 109.5      | C(23)-C(22)-C(24)   | 107.27(15) |
| H(15A)-C(15)-H(15B) | 109.5      | C(25)-C(22)-P(2)    | 114.47(12) |
| C(12)-C(15)-H(15C)  | 109.5      | C(23)-C(22)-P(2)    | 107.82(11) |
| H(15A)-C(15)-H(15C) | 109.5      | C(24)-C(22)-P(2)    | 109.78(11) |
| H(15B)-C(15)-H(15C) | 109.5      | C(22)-C(23)-H(23A)  | 109.5      |
| C(17)-C(16)-P(1)    | 121.83(11) | C(22)-C(23)-H(23B)  | 109.5      |
| C(17)-C(16)-H(16A)  | 106.9      | H(23A)-C(23)-H(23B) | 109.5      |
| P(1)-C(16)-H(16A)   | 106.9      | C(22)-C(23)-H(23C)  | 109.5      |
| C(17)-C(16)-H(16B)  | 106.9      | H(23A)-C(23)-H(23C) | 109.5      |
| P(1)-C(16)-H(16B)   | 106.9      | H(23B)-C(23)-H(23C) | 109.5      |
| H(16A)-C(16)-H(16B) | 106.7      | C(22)-C(24)-H(24A)  | 109.5      |
| C(18)-C(17)-O(1)    | 109.05(14) | C(22)-C(24)-H(24B)  | 109.5      |
| C(18)-C(17)-C(16)   | 133.14(15) | H(24A)-C(24)-H(24B) | 109.5      |
| O(1)-C(17)-C(16)    | 117.65(13) | C(22)-C(24)-H(24C)  | 109.5      |
| C(17)-C(18)-C(19)   | 107.33(14) | H(24A)-C(24)-H(24C) | 109.5      |
| C(17)-C(18)-H(18)   | 126.3      | H(24B)-C(24)-H(24C) | 109.5      |
| C(19)-C(18)-H(18)   | 126.3      | C(22)-C(25)-H(25A)  | 109.5      |
| C(20)-C(19)-C(18)   | 106.56(14) | C(22)-C(25)-H(25B)  | 109.5      |
| C(20)-C(19)-H(19)   | 126.7      | H(25A)-C(25)-H(25B) | 109.5      |
| C(18)-C(19)-H(19)   | 126.7      | C(22)-C(25)-H(25C)  | 109.5      |
| C(19)-C(20)-O(1)    | 109.68(14) | H(25A)-C(25)-H(25C) | 109.5      |
| C(19)-C(20)-C(21)   | 134.21(14) | H(25B)-C(25)-H(25C) | 109.5      |
| O(1)-C(20)-C(21)    | 116.11(13) | C(27)-C(26)-C(28)   | 109.73(13) |
| C(20)-C(21)-P(2)    | 116.77(11) | C(27)-C(26)-C(29)   | 108.79(13) |
| C(20)-C(21)-H(21A)  | 108.1      | C(28)-C(26)-C(29)   | 106.78(14) |
| P(2)-C(21)-H(21A)   | 108.1      | C(27)-C(26)-P(2)    | 109.39(11) |
| C(20)-C(21)-H(21B)  | 108.1      | C(28)-C(26)-P(2)    | 114.61(11) |
| P(2)-C(21)-H(21B)   | 108.1      | C(29)-C(26)-P(2)    | 107.34(11) |
| H(21A)-C(21)-H(21B) | 107.3      | C(26)-C(27)-H(27A)  | 109.5      |
| C(25)-C(22)-C(23)   | 107.97(14) | C(26)-C(27)-H(27B)  | 109.5      |
| C(25)-C(22)-C(24)   | 109.26(14) | H(27A)-C(27)-H(27B) | 109.5      |

|                     |            |                     |            |
|---------------------|------------|---------------------|------------|
| C(26)-C(27)-H(27C)  | 109.5      | C(34)-C(32)-Rh(2)   | 95.13(11)  |
| H(27A)-C(27)-H(27C) | 109.5      | C(33)-C(32)-H(32)   | 128.2(14)  |
| H(27B)-C(27)-H(27C) | 109.5      | C(34)-C(32)-H(32)   | 124.3(14)  |
| C(26)-C(28)-H(28A)  | 109.5      | Rh(2)-C(32)-H(32)   | 108.9(13)  |
| C(26)-C(28)-H(28B)  | 109.5      | C(32)-C(33)-C(35)   | 106.64(15) |
| H(28A)-C(28)-H(28B) | 109.5      | C(32)-C(33)-Rh(2)   | 70.71(10)  |
| C(26)-C(28)-H(28C)  | 109.5      | C(35)-C(33)-Rh(2)   | 95.43(10)  |
| H(28A)-C(28)-H(28C) | 109.5      | C(32)-C(33)-H(33)   | 126.3(13)  |
| H(28B)-C(28)-H(28C) | 109.5      | C(35)-C(33)-H(33)   | 126.3(13)  |
| C(26)-C(29)-H(29A)  | 109.5      | Rh(2)-C(33)-H(33)   | 109.0(13)  |
| C(26)-C(29)-H(29B)  | 109.5      | C(32)-C(34)-C(36)   | 101.03(15) |
| H(29A)-C(29)-H(29B) | 109.5      | C(32)-C(34)-C(30)   | 100.48(13) |
| C(26)-C(29)-H(29C)  | 109.5      | C(36)-C(34)-C(30)   | 100.52(15) |
| H(29A)-C(29)-H(29C) | 109.5      | C(32)-C(34)-H(34)   | 117.3      |
| H(29B)-C(29)-H(29C) | 109.5      | C(36)-C(34)-H(34)   | 117.3      |
| C(31)-C(30)-C(34)   | 106.01(14) | C(30)-C(34)-H(34)   | 117.3      |
| C(31)-C(30)-Rh(2)   | 71.21(9)   | C(31)-C(35)-C(33)   | 100.15(13) |
| C(34)-C(30)-Rh(2)   | 97.25(11)  | C(31)-C(35)-C(36)   | 100.82(14) |
| C(31)-C(30)-H(30)   | 125.1(14)  | C(33)-C(35)-C(36)   | 100.62(15) |
| C(34)-C(30)-H(30)   | 124.0(14)  | C(31)-C(35)-H(35)   | 117.4      |
| Rh(2)-C(30)-H(30)   | 118.1(14)  | C(33)-C(35)-H(35)   | 117.4      |
| C(30)-C(31)-C(35)   | 106.23(15) | C(36)-C(35)-H(35)   | 117.4      |
| C(30)-C(31)-Rh(2)   | 70.17(10)  | C(34)-C(36)-C(35)   | 94.01(13)  |
| C(35)-C(31)-Rh(2)   | 98.25(11)  | C(34)-C(36)-H(36A)  | 112.9      |
| C(30)-C(31)-H(31)   | 127.2(13)  | C(35)-C(36)-H(36A)  | 112.9      |
| C(35)-C(31)-H(31)   | 122.5(13)  | C(34)-C(36)-H(36B)  | 112.9      |
| Rh(2)-C(31)-H(31)   | 117.0(13)  | C(35)-C(36)-H(36B)  | 112.9      |
| C(33)-C(32)-C(34)   | 106.53(16) | H(36A)-C(36)-H(36B) | 110.3      |
| C(33)-C(32)-Rh(2)   | 72.43(10)  |                     |            |

---

Table A6. Anisotropic displacement parameters ( $\text{\AA}^2 \times 10^3$ ) for  $(\mu_2\text{-}^t\text{Bu-furPOP})[\text{Rh}(\text{NBD})\text{Cl}]_2$ . The anisotropic displacement factor exponent takes the form:  $-2\pi^2 [h^2 a^{*2}U^{11} + \dots + 2 h k a^* b^* U^{12}]$

|       | $U^{11}$ | $U^{22}$ | $U^{33}$ | $U^{23}$ | $U^{13}$ | $U^{12}$ |
|-------|----------|----------|----------|----------|----------|----------|
| Rh(1) | 14(1)    | 15(1)    | 11(1)    | -2(1)    | -2(1)    | 0(1)     |
| Rh(2) | 20(1)    | 14(1)    | 13(1)    | -1(1)    | -4(1)    | -3(1)    |
| Cl(1) | 21(1)    | 18(1)    | 20(1)    | -6(1)    | -2(1)    | -2(1)    |
| Cl(2) | 28(1)    | 18(1)    | 27(1)    | 0(1)     | -12(1)   | 0(1)     |
| P(1)  | 14(1)    | 14(1)    | 12(1)    | -2(1)    | -1(1)    | -2(1)    |
| P(2)  | 20(1)    | 12(1)    | 11(1)    | -1(1)    | -3(1)    | -1(1)    |
| O(1)  | 21(1)    | 18(1)    | 14(1)    | -1(1)    | -5(1)    | -6(1)    |
| C(1)  | 21(1)    | 22(1)    | 11(1)    | -1(1)    | -1(1)    | 2(1)     |
| C(2)  | 20(1)    | 23(1)    | 14(1)    | -1(1)    | -5(1)    | -3(1)    |
| C(3)  | 26(1)    | 18(1)    | 16(1)    | 0(1)     | -7(1)    | -3(1)    |
| C(4)  | 28(1)    | 16(1)    | 15(1)    | -2(1)    | -1(1)    | 4(1)     |
| C(5)  | 18(1)    | 24(1)    | 16(1)    | 2(1)     | -4(1)    | -3(1)    |
| C(6)  | 19(1)    | 23(1)    | 18(1)    | 0(1)     | -5(1)    | 3(1)     |
| C(7)  | 27(1)    | 22(1)    | 19(1)    | 3(1)     | -6(1)    | -2(1)    |
| C(8)  | 17(1)    | 20(1)    | 18(1)    | -4(1)    | 1(1)     | -5(1)    |
| C(9)  | 30(1)    | 34(1)    | 19(1)    | -6(1)    | 7(1)     | -13(1)   |
| C(10) | 20(1)    | 21(1)    | 21(1)    | -4(1)    | -2(1)    | -6(1)    |
| C(11) | 15(1)    | 25(1)    | 37(1)    | -8(1)    | 0(1)     | 0(1)     |
| C(12) | 22(1)    | 22(1)    | 16(1)    | -1(1)    | -5(1)    | 2(1)     |
| C(13) | 19(1)    | 42(1)    | 24(1)    | 1(1)     | -5(1)    | 7(1)     |
| C(14) | 36(1)    | 27(1)    | 15(1)    | 1(1)     | -8(1)    | -2(1)    |
| C(15) | 41(1)    | 20(1)    | 24(1)    | -2(1)    | -12(1)   | 6(1)     |
| C(16) | 20(1)    | 19(1)    | 18(1)    | -6(1)    | 0(1)     | -4(1)    |
| C(17) | 22(1)    | 19(1)    | 15(1)    | -4(1)    | 0(1)     | -5(1)    |

|       |       |       |       |       |        |        |
|-------|-------|-------|-------|-------|--------|--------|
| C(18) | 32(1) | 26(1) | 13(1) | -2(1) | -2(1)  | -11(1) |
| C(19) | 28(1) | 25(1) | 16(1) | -1(1) | -6(1)  | -10(1) |
| C(20) | 20(1) | 14(1) | 18(1) | -2(1) | -6(1)  | -4(1)  |
| C(21) | 21(1) | 14(1) | 14(1) | -1(1) | -4(1)  | -1(1)  |
| C(22) | 27(1) | 16(1) | 15(1) | -1(1) | 2(1)   | -1(1)  |
| C(23) | 24(1) | 25(1) | 26(1) | -2(1) | 4(1)   | 0(1)   |
| C(24) | 38(1) | 20(1) | 21(1) | -1(1) | 7(1)   | -8(1)  |
| C(25) | 38(1) | 26(1) | 14(1) | -2(1) | 0(1)   | 1(1)   |
| C(26) | 22(1) | 18(1) | 17(1) | -3(1) | -6(1)  | 2(1)   |
| C(27) | 33(1) | 17(1) | 21(1) | -3(1) | -9(1)  | 6(1)   |
| C(28) | 30(1) | 22(1) | 21(1) | -3(1) | -13(1) | 1(1)   |
| C(29) | 21(1) | 29(1) | 21(1) | -5(1) | -4(1)  | 2(1)   |
| C(30) | 36(1) | 15(1) | 17(1) | -2(1) | -2(1)  | -3(1)  |
| C(31) | 29(1) | 16(1) | 18(1) | -4(1) | -6(1)  | 1(1)   |
| C(32) | 27(1) | 27(1) | 22(1) | -6(1) | -9(1)  | -8(1)  |
| C(33) | 31(1) | 23(1) | 15(1) | -2(1) | -9(1)  | -6(1)  |
| C(34) | 35(1) | 24(1) | 25(1) | -5(1) | -2(1)  | -12(1) |
| C(35) | 32(1) | 22(1) | 16(1) | -5(1) | -2(1)  | -5(1)  |
| C(36) | 43(1) | 23(1) | 23(1) | -8(1) | -4(1)  | -9(1)  |

---

Table A7. Hydrogen coordinates ( $\times 10^4$ ) and isotropic displacement parameters ( $\text{\AA}^2 \times 10^{-3}$ )

for  $(\mu_2\text{-}^t\text{Bu}_2\text{furPOP})[\text{Rh}(\text{NBD})\text{Cl}]_2$ .

|        | x        | y        | z        | U(eq) |
|--------|----------|----------|----------|-------|
| H(1)   | 8850(20) | 4772(16) | 4422(13) | 22    |
| H(2)   | 6100(20) | 4988(16) | 4552(13) | 22    |
| H(3)   | 8810(20) | 6425(15) | 6240(14) | 23    |
| H(4)   | 6070(20) | 6659(16) | 6386(14) | 24    |
| H(5)   | 9831     | 6452     | 4656     | 23    |
| H(6)   | 5296     | 6779     | 4873     | 24    |
| H(7A)  | 7674     | 7079     | 3825     | 27    |
| H(7B)  | 7652     | 7751     | 4658     | 27    |
| H(9A)  | 3433     | 4034     | 9080     | 42    |
| H(9B)  | 4813     | 4600     | 9279     | 42    |
| H(9C)  | 4997     | 3441     | 9083     | 42    |
| H(10A) | 5086     | 2955     | 7518     | 31    |
| H(10B) | 4599     | 3786     | 6783     | 31    |
| H(10C) | 3432     | 3415     | 7600     | 31    |
| H(11A) | 2897     | 5184     | 7785     | 39    |
| H(11B) | 4232     | 5584     | 7089     | 39    |
| H(11C) | 4064     | 5867     | 8091     | 39    |
| H(13A) | 10393    | 3457     | 7889     | 43    |
| H(13B) | 9907     | 4619     | 7719     | 43    |
| H(13C) | 9699     | 3847     | 7013     | 43    |
| H(14A) | 7167     | 3639     | 9436     | 39    |
| H(14B) | 8372     | 4466     | 9230     | 39    |
| H(14C) | 8875     | 3300     | 9330     | 39    |
| H(15A) | 7697     | 2608     | 7359     | 42    |

|        |           |           |           |    |
|--------|-----------|-----------|-----------|----|
| H(15B) | 6849      | 2488      | 8343      | 42 |
| H(15C) | 8565      | 2184      | 8159      | 42 |
| H(16A) | 6390      | 6387      | 7869      | 23 |
| H(16B) | 6345      | 5712      | 8777      | 23 |
| H(18)  | 8603      | 6082      | 9656      | 28 |
| H(19)  | 10976     | 6991      | 9169      | 27 |
| H(21A) | 11263     | 7372      | 6647      | 20 |
| H(21B) | 12454     | 7236      | 7315      | 20 |
| H(23A) | 13963     | 7756      | 6180      | 39 |
| H(23B) | 14516     | 8391      | 6894      | 39 |
| H(23C) | 15075     | 8626      | 5865      | 39 |
| H(24A) | 14220     | 10372     | 5708      | 41 |
| H(24B) | 13990     | 10258     | 6764      | 41 |
| H(24C) | 12690     | 10735     | 6243      | 41 |
| H(25A) | 13220     | 9154      | 4858      | 40 |
| H(25B) | 11649     | 9634      | 5236      | 40 |
| H(25C) | 11969     | 8443      | 5337      | 40 |
| H(27A) | 8664      | 10813     | 6640      | 35 |
| H(27B) | 10272     | 10635     | 6116      | 35 |
| H(27C) | 10075     | 10888     | 7127      | 35 |
| H(28A) | 8947      | 8146      | 6499      | 36 |
| H(28B) | 9640      | 8932      | 5732      | 36 |
| H(28C) | 8018      | 9147      | 6224      | 36 |
| H(29A) | 7613      | 9588      | 7773      | 35 |
| H(29B) | 8969      | 9582      | 8321      | 35 |
| H(29C) | 8485      | 8552      | 8022      | 35 |
| H(30)  | 12310(20) | 11287(16) | 7663(15)  | 27 |
| H(31)  | 10090(20) | 10776(16) | 8683(14)  | 25 |
| H(32)  | 14710(20) | 9829(17)  | 9185(14)  | 29 |
| H(33)  | 12450(20) | 9326(16)  | 10219(14) | 27 |
| H(34)  | 14309     | 11618     | 8554      | 33 |



|        |       |       |       |    |
|--------|-------|-------|-------|----|
| H(35)  | 10577 | 10831 | 10240 | 28 |
| H(36A) | 11949 | 12328 | 9429  | 35 |
| H(36B) | 12964 | 11749 | 10122 | 35 |

---

Table A8. Torsion angles [°] for  $(\mu_2\text{-}^{\text{tBu}}\text{furPOP})[\text{Rh}(\text{NBD})\text{Cl}]_2$ .

|                        |             |                        |             |
|------------------------|-------------|------------------------|-------------|
| C(4)-Rh(1)-P(1)-C(16)  | -24.20(8)   | C(33)-Rh(2)-P(2)-C(22) | 162.35(18)  |
| C(3)-Rh(1)-P(1)-C(16)  | 15.14(8)    | Cl(2)-Rh(2)-P(2)-C(22) | -85.93(5)   |
| C(2)-Rh(1)-P(1)-C(16)  | -70.72(12)  | C(4)-Rh(1)-C(1)-C(2)   | -65.28(10)  |
| C(1)-Rh(1)-P(1)-C(16)  | 46.45(17)   | C(3)-Rh(1)-C(1)-C(2)   | -104.21(11) |
| Cl(1)-Rh(1)-P(1)-C(16) | 173.51(6)   | P(1)-Rh(1)-C(1)-C(2)   | -138.23(14) |
| C(4)-Rh(1)-P(1)-C(12)  | -147.02(8)  | Cl(1)-Rh(1)-C(1)-C(2)  | 94.03(9)    |
| C(3)-Rh(1)-P(1)-C(12)  | -107.69(8)  | C(4)-Rh(1)-C(1)-C(5)   | 40.68(10)   |
| C(2)-Rh(1)-P(1)-C(12)  | 166.45(11)  | C(3)-Rh(1)-C(1)-C(5)   | 1.75(9)     |
| C(1)-Rh(1)-P(1)-C(12)  | -76.37(17)  | C(2)-Rh(1)-C(1)-C(5)   | 105.96(14)  |
| Cl(1)-Rh(1)-P(1)-C(12) | 50.68(6)    | P(1)-Rh(1)-C(1)-C(5)   | -32.3(2)    |
| C(4)-Rh(1)-P(1)-C(8)   | 87.07(7)    | Cl(1)-Rh(1)-C(1)-C(5)  | -160.01(9)  |
| C(3)-Rh(1)-P(1)-C(8)   | 126.40(7)   | C(5)-C(1)-C(2)-C(6)    | 0.08(16)    |
| C(2)-Rh(1)-P(1)-C(8)   | 40.54(11)   | Rh(1)-C(1)-C(2)-C(6)   | 89.24(11)   |
| C(1)-Rh(1)-P(1)-C(8)   | 157.72(16)  | C(5)-C(1)-C(2)-Rh(1)   | -89.16(10)  |
| Cl(1)-Rh(1)-P(1)-C(8)  | -75.22(6)   | C(4)-Rh(1)-C(2)-C(1)   | 103.71(11)  |
| C(30)-Rh(2)-P(2)-C(21) | 179.61(7)   | C(3)-Rh(1)-C(2)-C(1)   | 64.52(10)   |
| C(31)-Rh(2)-P(2)-C(21) | -140.70(7)  | P(1)-Rh(1)-C(2)-C(1)   | 155.57(9)   |
| C(32)-Rh(2)-P(2)-C(21) | 121.49(15)  | Cl(1)-Rh(1)-C(2)-C(1)  | -87.81(9)   |
| C(33)-Rh(2)-P(2)-C(21) | -87.08(18)  | C(4)-Rh(1)-C(2)-C(6)   | -2.79(9)    |
| Cl(2)-Rh(2)-P(2)-C(21) | 24.65(6)    | C(3)-Rh(1)-C(2)-C(6)   | -41.99(10)  |
| C(30)-Rh(2)-P(2)-C(26) | -58.37(8)   | C(1)-Rh(1)-C(2)-C(6)   | -106.51(14) |
| C(31)-Rh(2)-P(2)-C(26) | -18.67(8)   | P(1)-Rh(1)-C(2)-C(6)   | 49.06(15)   |
| C(32)-Rh(2)-P(2)-C(26) | -116.49(15) | Cl(1)-Rh(1)-C(2)-C(6)  | 165.68(9)   |
| C(33)-Rh(2)-P(2)-C(26) | 34.95(18)   | C(2)-Rh(1)-C(3)-C(4)   | 66.69(10)   |
| Cl(2)-Rh(2)-P(2)-C(26) | 146.67(6)   | C(1)-Rh(1)-C(3)-C(4)   | 102.41(10)  |
| C(30)-Rh(2)-P(2)-C(22) | 69.03(7)    | P(1)-Rh(1)-C(3)-C(4)   | -86.58(9)   |
| C(31)-Rh(2)-P(2)-C(22) | 108.73(7)   | Cl(1)-Rh(1)-C(3)-C(4)  | 143.52(9)   |
| C(32)-Rh(2)-P(2)-C(22) | 10.91(15)   | C(4)-Rh(1)-C(3)-C(5)   | -104.18(13) |

|                       |             |                        |             |
|-----------------------|-------------|------------------------|-------------|
| C(2)-Rh(1)-C(3)-C(5)  | -37.49(10)  | Rh(1)-C(4)-C(6)-C(7)   | -106.63(11) |
| C(1)-Rh(1)-C(3)-C(5)  | -1.76(9)    | C(1)-C(5)-C(7)-C(6)    | 50.72(14)   |
| P(1)-Rh(1)-C(3)-C(5)  | 169.24(9)   | C(3)-C(5)-C(7)-C(6)    | -51.78(14)  |
| Cl(1)-Rh(1)-C(3)-C(5) | 39.34(16)   | C(2)-C(6)-C(7)-C(5)    | -50.48(14)  |
| C(5)-C(3)-C(4)-C(6)   | 0.57(17)    | C(4)-C(6)-C(7)-C(5)    | 52.24(14)   |
| Rh(1)-C(3)-C(4)-C(6)  | -93.73(11)  | C(16)-P(1)-C(8)-C(10)  | 170.57(11)  |
| C(5)-C(3)-C(4)-Rh(1)  | 94.29(11)   | C(12)-P(1)-C(8)-C(10)  | -80.35(12)  |
| C(2)-Rh(1)-C(4)-C(3)  | -101.10(10) | Rh(1)-P(1)-C(8)-C(10)  | 48.07(12)   |
| C(1)-Rh(1)-C(4)-C(3)  | -65.32(10)  | C(16)-P(1)-C(8)-C(9)   | -66.15(13)  |
| P(1)-Rh(1)-C(4)-C(3)  | 99.37(9)    | C(12)-P(1)-C(8)-C(9)   | 42.93(14)   |
| Cl(1)-Rh(1)-C(4)-C(3) | -132.43(12) | Rh(1)-P(1)-C(8)-C(9)   | 171.34(11)  |
| C(3)-Rh(1)-C(4)-C(6)  | 103.91(14)  | C(16)-P(1)-C(8)-C(11)  | 54.77(12)   |
| C(2)-Rh(1)-C(4)-C(6)  | 2.81(9)     | C(12)-P(1)-C(8)-C(11)  | 163.84(11)  |
| C(1)-Rh(1)-C(4)-C(6)  | 38.59(10)   | Rh(1)-P(1)-C(8)-C(11)  | -67.74(11)  |
| P(1)-Rh(1)-C(4)-C(6)  | -156.72(9)  | C(16)-P(1)-C(12)-C(14) | 34.92(14)   |
| Cl(1)-Rh(1)-C(4)-C(6) | -28.52(19)  | C(8)-P(1)-C(12)-C(14)  | -70.79(14)  |
| C(2)-C(1)-C(5)-C(3)   | 69.41(15)   | Rh(1)-P(1)-C(12)-C(14) | 164.15(11)  |
| Rh(1)-C(1)-C(5)-C(3)  | -2.21(11)   | C(16)-P(1)-C(12)-C(15) | 157.94(12)  |
| C(2)-C(1)-C(5)-C(7)   | -33.41(16)  | C(8)-P(1)-C(12)-C(15)  | 52.24(14)   |
| Rh(1)-C(1)-C(5)-C(7)  | -105.03(10) | Rh(1)-P(1)-C(12)-C(15) | -72.83(13)  |
| C(4)-C(3)-C(5)-C(1)   | -69.61(15)  | C(16)-P(1)-C(12)-C(13) | -85.06(12)  |
| Rh(1)-C(3)-C(5)-C(1)  | 2.37(12)    | C(8)-P(1)-C(12)-C(13)  | 169.24(11)  |
| C(4)-C(3)-C(5)-C(7)   | 33.47(16)   | Rh(1)-P(1)-C(12)-C(13) | 44.17(12)   |
| Rh(1)-C(3)-C(5)-C(7)  | 105.45(11)  | C(12)-P(1)-C(16)-C(17) | 48.87(15)   |
| C(1)-C(2)-C(6)-C(4)   | -69.66(15)  | C(8)-P(1)-C(16)-C(17)  | 163.33(13)  |
| Rh(1)-C(2)-C(6)-C(4)  | 3.55(12)    | Rh(1)-P(1)-C(16)-C(17) | -79.60(14)  |
| C(1)-C(2)-C(6)-C(7)   | 33.22(16)   | C(20)-O(1)-C(17)-C(18) | 0.51(18)    |
| Rh(1)-C(2)-C(6)-C(7)  | 106.43(10)  | C(20)-O(1)-C(17)-C(16) | 176.52(13)  |
| C(3)-C(4)-C(6)-C(2)   | 68.47(15)   | P(1)-C(16)-C(17)-C(18) | -113.7(2)   |
| Rh(1)-C(4)-C(6)-C(2)  | -3.76(13)   | P(1)-C(16)-C(17)-O(1)  | 71.46(18)   |
| C(3)-C(4)-C(6)-C(7)   | -34.40(16)  | O(1)-C(17)-C(18)-C(19) | -0.7(2)     |

|                         |             |                         |             |
|-------------------------|-------------|-------------------------|-------------|
| C(16)-C(17)-C(18)-C(19) | -175.88(17) | Cl(2)-Rh(2)-C(30)-C(31) | -142.15(9)  |
| C(17)-C(18)-C(19)-C(20) | 0.7(2)      | P(2)-Rh(2)-C(30)-C(31)  | 98.54(9)    |
| C(18)-C(19)-C(20)-O(1)  | -0.36(19)   | C(31)-Rh(2)-C(30)-C(34) | 104.51(14)  |
| C(18)-C(19)-C(20)-C(21) | -179.14(17) | C(32)-Rh(2)-C(30)-C(34) | 2.76(10)    |
| C(17)-O(1)-C(20)-C(19)  | -0.08(18)   | C(33)-Rh(2)-C(30)-C(34) | 39.30(11)   |
| C(17)-O(1)-C(20)-C(21)  | 178.95(13)  | Cl(2)-Rh(2)-C(30)-C(34) | -37.64(16)  |
| C(19)-C(20)-C(21)-P(2)  | -73.2(2)    | P(2)-Rh(2)-C(30)-C(34)  | -156.95(10) |
| O(1)-C(20)-C(21)-P(2)   | 108.05(13)  | C(34)-C(30)-C(31)-C(35) | 0.74(18)    |
| C(26)-P(2)-C(21)-C(20)  | -61.76(13)  | Rh(2)-C(30)-C(31)-C(35) | 93.09(11)   |
| C(22)-P(2)-C(21)-C(20)  | -176.61(12) | C(34)-C(30)-C(31)-Rh(2) | -92.35(12)  |
| Rh(2)-P(2)-C(21)-C(20)  | 67.58(12)   | C(32)-Rh(2)-C(31)-C(30) | 66.56(11)   |
| C(21)-P(2)-C(22)-C(25)  | 73.63(13)   | C(33)-Rh(2)-C(31)-C(30) | 102.86(11)  |
| C(26)-P(2)-C(22)-C(25)  | -36.28(14)  | Cl(2)-Rh(2)-C(31)-C(30) | 129.67(12)  |
| Rh(2)-P(2)-C(22)-C(25)  | -167.61(10) | P(2)-Rh(2)-C(31)-C(30)  | -91.16(10)  |
| C(21)-P(2)-C(22)-C(23)  | -46.53(13)  | C(30)-Rh(2)-C(31)-C(35) | -104.36(15) |
| C(26)-P(2)-C(22)-C(23)  | -156.43(11) | C(32)-Rh(2)-C(31)-C(35) | -37.79(11)  |
| Rh(2)-P(2)-C(22)-C(23)  | 72.24(12)   | C(33)-Rh(2)-C(31)-C(35) | -1.49(10)   |
| C(21)-P(2)-C(22)-C(24)  | -163.08(12) | Cl(2)-Rh(2)-C(31)-C(35) | 25.3(2)     |
| C(26)-P(2)-C(22)-C(24)  | 87.01(13)   | P(2)-Rh(2)-C(31)-C(35)  | 164.48(9)   |
| Rh(2)-P(2)-C(22)-C(24)  | -44.32(13)  | C(30)-Rh(2)-C(32)-C(33) | 102.97(12)  |
| C(21)-P(2)-C(26)-C(27)  | -163.56(11) | C(31)-Rh(2)-C(32)-C(33) | 64.48(11)   |
| C(22)-P(2)-C(26)-C(27)  | -56.32(12)  | Cl(2)-Rh(2)-C(32)-C(33) | -95.35(10)  |
| Rh(2)-P(2)-C(26)-C(27)  | 70.17(11)   | P(2)-Rh(2)-C(32)-C(33)  | 167.33(10)  |
| C(21)-P(2)-C(26)-C(28)  | -39.86(13)  | C(30)-Rh(2)-C(32)-C(34) | -2.77(11)   |
| C(22)-P(2)-C(26)-C(28)  | 67.39(14)   | C(31)-Rh(2)-C(32)-C(34) | -41.25(11)  |
| Rh(2)-P(2)-C(26)-C(28)  | -166.13(10) | C(33)-Rh(2)-C(32)-C(34) | -105.73(16) |
| C(21)-P(2)-C(26)-C(29)  | 78.55(12)   | Cl(2)-Rh(2)-C(32)-C(34) | 158.92(11)  |
| C(22)-P(2)-C(26)-C(29)  | -174.21(11) | P(2)-Rh(2)-C(32)-C(34)  | 61.60(19)   |
| Rh(2)-P(2)-C(26)-C(29)  | -47.72(12)  | C(34)-C(32)-C(33)-C(35) | 0.22(17)    |
| C(32)-Rh(2)-C(30)-C(31) | -101.75(11) | Rh(2)-C(32)-C(33)-C(35) | -90.00(11)  |
| C(33)-Rh(2)-C(30)-C(31) | -65.21(10)  | C(34)-C(32)-C(33)-Rh(2) | 90.23(12)   |

|                         |             |
|-------------------------|-------------|
| C(30)-Rh(2)-C(33)-C(32) | -65.97(12)  |
| C(31)-Rh(2)-C(33)-C(32) | -104.26(12) |
| Cl(2)-Rh(2)-C(33)-C(32) | 85.79(11)   |
| P(2)-Rh(2)-C(33)-C(32)  | -162.57(14) |
| C(30)-Rh(2)-C(33)-C(35) | 39.78(11)   |
| C(31)-Rh(2)-C(33)-C(35) | 1.48(10)    |
| C(32)-Rh(2)-C(33)-C(35) | 105.75(15)  |
| Cl(2)-Rh(2)-C(33)-C(35) | -168.46(10) |
| P(2)-Rh(2)-C(33)-C(35)  | -56.8(2)    |
| C(33)-C(32)-C(34)-C(36) | 33.39(17)   |
| Rh(2)-C(32)-C(34)-C(36) | 106.57(12)  |
| C(33)-C(32)-C(34)-C(30) | -69.63(16)  |
| Rh(2)-C(32)-C(34)-C(30) | 3.55(13)    |
| C(31)-C(30)-C(34)-C(32) | 68.80(17)   |
| Rh(2)-C(30)-C(34)-C(32) | -3.66(14)   |
| C(31)-C(30)-C(34)-C(36) | -34.63(17)  |
| Rh(2)-C(30)-C(34)-C(36) | -107.09(12) |
| C(30)-C(31)-C(35)-C(33) | -69.67(16)  |
| Rh(2)-C(31)-C(35)-C(33) | 1.98(13)    |
| C(30)-C(31)-C(35)-C(36) | 33.32(17)   |
| Rh(2)-C(31)-C(35)-C(36) | 104.97(12)  |
| C(32)-C(33)-C(35)-C(31) | 69.55(16)   |
| Rh(2)-C(33)-C(35)-C(31) | -1.91(13)   |
| C(32)-C(33)-C(35)-C(36) | -33.60(16)  |
| Rh(2)-C(33)-C(35)-C(36) | -105.06(11) |
| C(32)-C(34)-C(36)-C(35) | -50.91(16)  |
| C(30)-C(34)-C(36)-C(35) | 52.08(16)   |
| C(31)-C(35)-C(36)-C(34) | -51.79(16)  |
| C(33)-C(35)-C(36)-C(34) | 50.83(15)   |



Figure B1: ORTEP diagram of (<sup>t</sup>Bu<sub>xan</sub>POP)RhCl

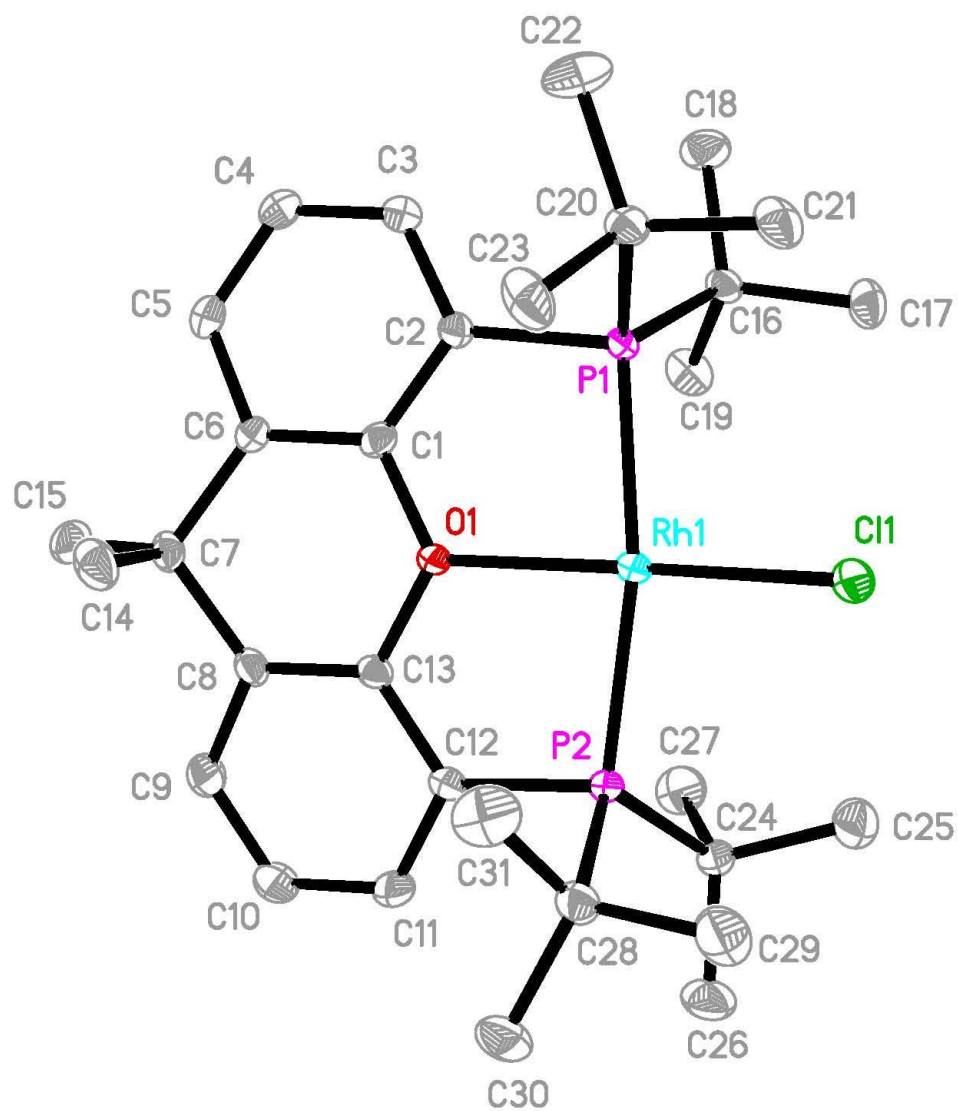

Table B2. Crystal data and structure refinement for (<sup>t</sup>Bu<sub>3</sub>xanPOP)RhCl.

|                                   |                                                        |                  |
|-----------------------------------|--------------------------------------------------------|------------------|
| Identification code               | mh307                                                  |                  |
| Empirical formula                 | C <sub>31</sub> H <sub>48</sub> Cl O P <sub>2</sub> Rh |                  |
| Formula weight                    | 636.99                                                 |                  |
| Temperature                       | 100(2) K                                               |                  |
| Wavelength                        | 0.71073 Å                                              |                  |
| Crystal system                    | Monoclinic                                             |                  |
| Space group                       | P2(1)/c                                                |                  |
| Unit cell dimensions              | a = 11.2641(8) Å                                       | α = 90°.         |
|                                   | b = 16.8195(13) Å                                      | β = 107.246(1)°. |
|                                   | c = 16.9432(13) Å                                      | γ = 90°.         |
| Volume                            | 3065.7(4) Å <sup>3</sup>                               |                  |
| Z                                 | 4                                                      |                  |
| Density (calculated)              | 1.380 Mg/m <sup>3</sup>                                |                  |
| Absorption coefficient            | 0.771 mm <sup>-1</sup>                                 |                  |
| F(000)                            | 1336                                                   |                  |
| Crystal size                      | 0.70 x 0.40 x 0.05 mm <sup>3</sup>                     |                  |
| Theta range for data collection   | 1.75 to 27.10°.                                        |                  |
| Index ranges                      | -14 ≤ h ≤ 14, -21 ≤ k ≤ 21, -21 ≤ l ≤ 19               |                  |
| Reflections collected             | 21203                                                  |                  |
| Independent reflections           | 6706 [R(int) = 0.0260]                                 |                  |
| Completeness to theta = 27.10°    | 99.0 %                                                 |                  |
| Absorption correction             | Semi-empirical from equivalents                        |                  |
| Max. and min. transmission        | 0.9625 and 0.6145                                      |                  |
| Refinement method                 | Full-matrix least-squares on F <sup>2</sup>            |                  |
| Data / restraints / parameters    | 6706 / 0 / 339                                         |                  |
| Goodness-of-fit on F <sup>2</sup> | 1.006                                                  |                  |
| Final R indices [I > 2σ(I)]       | R1 = 0.0366, wR2 = 0.0891                              |                  |
| R indices (all data)              | R1 = 0.0413, wR2 = 0.0919                              |                  |
| Largest diff. peak and hole       | 1.899 and -0.317 e.Å <sup>-3</sup>                     |                  |



Table B3. Atomic coordinates ( $\times 10^4$ ) and equivalent isotropic displacement parameters ( $\text{\AA}^2 \times 10^3$ ) for (**<sup>t</sup>Bu<sub>x</sub>anPOP**)RhCl. U(eq) is defined as one third of the trace of the orthogonalized  $U^{ij}$  tensor.

|       | x       | y       | z       | U(eq) |
|-------|---------|---------|---------|-------|
| Rh(1) | 2941(1) | 5911(1) | 2808(1) | 14(1) |
| P(1)  | 1755(1) | 5094(1) | 3335(1) | 13(1) |
| P(2)  | 3709(1) | 6654(1) | 1959(1) | 14(1) |
| Cl(1) | 3818(1) | 6649(1) | 4001(1) | 25(1) |
| O(1)  | 2349(2) | 5147(1) | 1750(1) | 14(1) |
| C(1)  | 1533(2) | 4512(1) | 1747(2) | 15(1) |
| C(2)  | 1128(2) | 4429(2) | 2447(2) | 15(1) |
| C(3)  | 302(3)  | 3806(2) | 2443(2) | 21(1) |
| C(4)  | -91(3)  | 3295(2) | 1781(2) | 26(1) |
| C(5)  | 356(3)  | 3381(2) | 1111(2) | 23(1) |
| C(6)  | 1190(2) | 3985(1) | 1080(2) | 16(1) |
| C(7)  | 1794(2) | 4036(2) | 388(2)  | 17(1) |
| C(8)  | 2150(2) | 4895(2) | 298(2)  | 16(1) |
| C(9)  | 2284(3) | 5191(2) | -438(2) | 24(1) |
| C(10) | 2768(3) | 5940(2) | -480(2) | 27(1) |
| C(11) | 3172(3) | 6399(2) | 223(2)  | 22(1) |
| C(12) | 3060(2) | 6132(2) | 976(2)  | 16(1) |
| C(13) | 2505(2) | 5392(1) | 986(2)  | 14(1) |
| C(14) | 3013(3) | 3550(2) | 651(2)  | 26(1) |
| C(15) | 953(3)  | 3694(2) | -422(2) | 25(1) |
| C(16) | 346(2)  | 5597(2) | 3494(2) | 16(1) |
| C(17) | 784(3)  | 6223(2) | 4176(2) | 22(1) |
| C(18) | -626(3) | 5066(2) | 3705(2) | 27(1) |
| C(19) | -279(3) | 6021(2) | 2676(2) | 24(1) |
| C(20) | 2565(2) | 4403(2) | 4201(2) | 18(1) |
| C(21) | 3091(3) | 4891(2) | 4990(2) | 23(1) |

|       |         |         |         |       |
|-------|---------|---------|---------|-------|
| C(22) | 1849(3) | 3688(2) | 4394(2) | 33(1) |
| C(23) | 3664(3) | 4083(2) | 3934(2) | 27(1) |
| C(24) | 3127(2) | 7714(2) | 1761(2) | 18(1) |
| C(25) | 3238(3) | 8113(2) | 2592(2) | 28(1) |
| C(26) | 3730(3) | 8246(2) | 1269(2) | 31(1) |
| C(27) | 1718(3) | 7656(2) | 1297(2) | 29(1) |
| C(28) | 5438(2) | 6557(2) | 2123(2) | 20(1) |
| C(29) | 6098(3) | 7083(2) | 2863(2) | 35(1) |
| C(30) | 5909(3) | 6764(2) | 1388(2) | 30(1) |
| C(31) | 5722(3) | 5681(2) | 2342(2) | 33(1) |

---

Table B4. Bond lengths [Å] and angles [°] for (<sup>t</sup>Bu<sub>xan</sub>POP)RhCl.

|             |            |              |          |
|-------------|------------|--------------|----------|
| Rh(1)-O(1)  | 2.1446(17) | C(14)-H(14A) | 0.9800   |
| Rh(1)-P(2)  | 2.2613(7)  | C(14)-H(14B) | 0.9800   |
| Rh(1)-P(1)  | 2.2753(6)  | C(14)-H(14C) | 0.9800   |
| Rh(1)-Cl(1) | 2.3282(7)  | C(15)-H(15A) | 0.9800   |
| P(1)-C(2)   | 1.839(3)   | C(15)-H(15B) | 0.9800   |
| P(1)-C(20)  | 1.883(3)   | C(15)-H(15C) | 0.9800   |
| P(1)-C(16)  | 1.887(3)   | C(16)-C(19)  | 1.532(4) |
| P(2)-C(12)  | 1.833(3)   | C(16)-C(17)  | 1.534(4) |
| P(2)-C(28)  | 1.891(3)   | C(16)-C(18)  | 1.535(4) |
| P(2)-C(24)  | 1.895(3)   | C(17)-H(17A) | 0.9800   |
| O(1)-C(1)   | 1.408(3)   | C(17)-H(17B) | 0.9800   |
| O(1)-C(13)  | 1.417(3)   | C(17)-H(17C) | 0.9800   |
| C(1)-C(2)   | 1.398(4)   | C(18)-H(18A) | 0.9800   |
| C(1)-C(6)   | 1.398(3)   | C(18)-H(18B) | 0.9800   |
| C(2)-C(3)   | 1.400(4)   | C(18)-H(18C) | 0.9800   |
| C(3)-C(4)   | 1.378(4)   | C(19)-H(19A) | 0.9800   |
| C(3)-H(3)   | 0.9500     | C(19)-H(19B) | 0.9800   |
| C(4)-C(5)   | 1.379(4)   | C(19)-H(19C) | 0.9800   |
| C(4)-H(4)   | 0.9500     | C(20)-C(21)  | 1.531(4) |
| C(5)-C(6)   | 1.396(4)   | C(20)-C(23)  | 1.536(4) |
| C(5)-H(5)   | 0.9500     | C(20)-C(22)  | 1.536(4) |
| C(6)-C(7)   | 1.522(4)   | C(21)-H(21A) | 0.9800   |
| C(7)-C(8)   | 1.519(3)   | C(21)-H(21B) | 0.9800   |
| C(7)-C(15)  | 1.530(4)   | C(21)-H(21C) | 0.9800   |
| C(7)-C(14)  | 1.546(4)   | C(22)-H(22A) | 0.9800   |
| C(8)-C(9)   | 1.392(4)   | C(22)-H(22B) | 0.9800   |
| C(8)-C(13)  | 1.393(3)   | C(22)-H(22C) | 0.9800   |
| C(9)-C(10)  | 1.384(4)   | C(23)-H(23A) | 0.9800   |
| C(9)-H(9)   | 0.9500     | C(23)-H(23B) | 0.9800   |
| C(10)-C(11) | 1.380(4)   | C(23)-H(23C) | 0.9800   |
| C(10)-H(10) | 0.9500     | C(24)-C(26)  | 1.515(4) |
| C(11)-C(12) | 1.394(4)   | C(24)-C(25)  | 1.531(4) |
| C(11)-H(11) | 0.9500     | C(24)-C(27)  | 1.551(4) |
| C(12)-C(13) | 1.395(3)   | C(25)-H(25A) | 0.9800   |

|                  |            |                  |            |
|------------------|------------|------------------|------------|
| C(25)-H(25B)     | 0.9800     | C(28)-C(29)      | 1.535(4)   |
| C(25)-H(25C)     | 0.9800     | C(29)-H(29A)     | 0.9800     |
| C(26)-H(26A)     | 0.9800     | C(29)-H(29B)     | 0.9800     |
| C(26)-H(26B)     | 0.9800     | C(29)-H(29C)     | 0.9800     |
| C(26)-H(26C)     | 0.9800     | C(30)-H(30A)     | 0.9800     |
| C(27)-H(27A)     | 0.9800     | C(30)-H(30B)     | 0.9800     |
| C(27)-H(27B)     | 0.9800     | C(30)-H(30C)     | 0.9800     |
| C(27)-H(27C)     | 0.9800     | C(31)-H(31A)     | 0.9800     |
| C(28)-C(31)      | 1.530(4)   | C(31)-H(31B)     | 0.9800     |
| C(28)-C(30)      | 1.532(4)   | C(31)-H(31C)     | 0.9800     |
| O(1)-Rh(1)-P(2)  | 83.27(5)   | C(1)-C(2)-P(1)   | 119.34(19) |
| O(1)-Rh(1)-P(1)  | 83.86(5)   | C(3)-C(2)-P(1)   | 123.6(2)   |
| P(2)-Rh(1)-P(1)  | 164.36(2)  | C(4)-C(3)-C(2)   | 121.6(3)   |
| O(1)-Rh(1)-Cl(1) | 172.76(5)  | C(4)-C(3)-H(3)   | 119.2      |
| P(2)-Rh(1)-Cl(1) | 96.48(2)   | C(2)-C(3)-H(3)   | 119.2      |
| P(1)-Rh(1)-Cl(1) | 97.40(2)   | C(3)-C(4)-C(5)   | 119.8(3)   |
| C(2)-P(1)-C(20)  | 104.01(11) | C(3)-C(4)-H(4)   | 120.1      |
| C(2)-P(1)-C(16)  | 104.71(11) | C(5)-C(4)-H(4)   | 120.1      |
| C(20)-P(1)-C(16) | 113.50(11) | C(4)-C(5)-C(6)   | 121.5(3)   |
| C(2)-P(1)-Rh(1)  | 100.04(8)  | C(4)-C(5)-H(5)   | 119.3      |
| C(20)-P(1)-Rh(1) | 118.28(8)  | C(6)-C(5)-H(5)   | 119.3      |
| C(16)-P(1)-Rh(1) | 113.71(8)  | C(5)-C(6)-C(1)   | 117.3(2)   |
| C(12)-P(2)-C(28) | 102.00(12) | C(5)-C(6)-C(7)   | 122.0(2)   |
| C(12)-P(2)-C(24) | 105.44(12) | C(1)-C(6)-C(7)   | 120.6(2)   |
| C(28)-P(2)-C(24) | 113.23(12) | C(8)-C(7)-C(6)   | 108.8(2)   |
| C(12)-P(2)-Rh(1) | 100.81(8)  | C(8)-C(7)-C(15)  | 112.2(2)   |
| C(28)-P(2)-Rh(1) | 115.47(9)  | C(6)-C(7)-C(15)  | 111.8(2)   |
| C(24)-P(2)-Rh(1) | 117.12(8)  | C(8)-C(7)-C(14)  | 107.1(2)   |
| C(1)-O(1)-C(13)  | 118.36(19) | C(6)-C(7)-C(14)  | 108.0(2)   |
| C(1)-O(1)-Rh(1)  | 119.84(14) | C(15)-C(7)-C(14) | 108.7(2)   |
| C(13)-O(1)-Rh(1) | 119.80(14) | C(9)-C(8)-C(13)  | 117.1(2)   |
| C(2)-C(1)-C(6)   | 122.8(2)   | C(9)-C(8)-C(7)   | 122.1(2)   |
| C(2)-C(1)-O(1)   | 116.8(2)   | C(13)-C(8)-C(7)  | 120.3(2)   |
| C(6)-C(1)-O(1)   | 120.4(2)   | C(10)-C(9)-C(8)  | 121.4(3)   |
| C(1)-C(2)-C(3)   | 117.0(2)   | C(10)-C(9)-H(9)  | 119.3      |

|                     |            |                     |            |
|---------------------|------------|---------------------|------------|
| C(8)-C(9)-H(9)      | 119.3      | H(17B)-C(17)-H(17C) | 109.5      |
| C(11)-C(10)-C(9)    | 120.0(3)   | C(16)-C(18)-H(18A)  | 109.5      |
| C(11)-C(10)-H(10)   | 120.0      | C(16)-C(18)-H(18B)  | 109.5      |
| C(9)-C(10)-H(10)    | 120.0      | H(18A)-C(18)-H(18B) | 109.5      |
| C(10)-C(11)-C(12)   | 120.9(3)   | C(16)-C(18)-H(18C)  | 109.5      |
| C(10)-C(11)-H(11)   | 119.5      | H(18A)-C(18)-H(18C) | 109.5      |
| C(12)-C(11)-H(11)   | 119.5      | H(18B)-C(18)-H(18C) | 109.5      |
| C(11)-C(12)-C(13)   | 117.5(2)   | C(16)-C(19)-H(19A)  | 109.5      |
| C(11)-C(12)-P(2)    | 123.9(2)   | C(16)-C(19)-H(19B)  | 109.5      |
| C(13)-C(12)-P(2)    | 118.45(19) | H(19A)-C(19)-H(19B) | 109.5      |
| C(8)-C(13)-C(12)    | 122.9(2)   | C(16)-C(19)-H(19C)  | 109.5      |
| C(8)-C(13)-O(1)     | 120.5(2)   | H(19A)-C(19)-H(19C) | 109.5      |
| C(12)-C(13)-O(1)    | 116.6(2)   | H(19B)-C(19)-H(19C) | 109.5      |
| C(7)-C(14)-H(14A)   | 109.5      | C(21)-C(20)-C(23)   | 108.0(2)   |
| C(7)-C(14)-H(14B)   | 109.5      | C(21)-C(20)-C(22)   | 109.0(2)   |
| H(14A)-C(14)-H(14B) | 109.5      | C(23)-C(20)-C(22)   | 108.0(2)   |
| C(7)-C(14)-H(14C)   | 109.5      | C(21)-C(20)-P(1)    | 108.79(17) |
| H(14A)-C(14)-H(14C) | 109.5      | C(23)-C(20)-P(1)    | 103.49(18) |
| H(14B)-C(14)-H(14C) | 109.5      | C(22)-C(20)-P(1)    | 119.08(19) |
| C(7)-C(15)-H(15A)   | 109.5      | C(20)-C(21)-H(21A)  | 109.5      |
| C(7)-C(15)-H(15B)   | 109.5      | C(20)-C(21)-H(21B)  | 109.5      |
| H(15A)-C(15)-H(15B) | 109.5      | H(21A)-C(21)-H(21B) | 109.5      |
| C(7)-C(15)-H(15C)   | 109.5      | C(20)-C(21)-H(21C)  | 109.5      |
| H(15A)-C(15)-H(15C) | 109.5      | H(21A)-C(21)-H(21C) | 109.5      |
| H(15B)-C(15)-H(15C) | 109.5      | H(21B)-C(21)-H(21C) | 109.5      |
| C(19)-C(16)-C(17)   | 108.7(2)   | C(20)-C(22)-H(22A)  | 109.5      |
| C(19)-C(16)-C(18)   | 108.3(2)   | C(20)-C(22)-H(22B)  | 109.5      |
| C(17)-C(16)-C(18)   | 108.4(2)   | H(22A)-C(22)-H(22B) | 109.5      |
| C(19)-C(16)-P(1)    | 105.10(17) | C(20)-C(22)-H(22C)  | 109.5      |
| C(17)-C(16)-P(1)    | 108.62(17) | H(22A)-C(22)-H(22C) | 109.5      |
| C(18)-C(16)-P(1)    | 117.43(18) | H(22B)-C(22)-H(22C) | 109.5      |
| C(16)-C(17)-H(17A)  | 109.5      | C(20)-C(23)-H(23A)  | 109.5      |
| C(16)-C(17)-H(17B)  | 109.5      | C(20)-C(23)-H(23B)  | 109.5      |
| H(17A)-C(17)-H(17B) | 109.5      | H(23A)-C(23)-H(23B) | 109.5      |
| C(16)-C(17)-H(17C)  | 109.5      | C(20)-C(23)-H(23C)  | 109.5      |
| H(17A)-C(17)-H(17C) | 109.5      | H(23A)-C(23)-H(23C) | 109.5      |

|                     |            |                     |            |
|---------------------|------------|---------------------|------------|
| H(23B)-C(23)-H(23C) | 109.5      | C(31)-C(28)-C(30)   | 108.6(2)   |
| C(26)-C(24)-C(25)   | 108.7(2)   | C(31)-C(28)-C(29)   | 110.0(3)   |
| C(26)-C(24)-C(27)   | 108.4(2)   | C(30)-C(28)-C(29)   | 109.3(2)   |
| C(25)-C(24)-C(27)   | 106.6(2)   | C(31)-C(28)-P(2)    | 104.57(18) |
| C(26)-C(24)-P(2)    | 117.8(2)   | C(30)-C(28)-P(2)    | 116.8(2)   |
| C(25)-C(24)-P(2)    | 108.66(19) | C(29)-C(28)-P(2)    | 107.38(19) |
| C(27)-C(24)-P(2)    | 106.18(18) | C(28)-C(29)-H(29A)  | 109.5      |
| C(24)-C(25)-H(25A)  | 109.5      | C(28)-C(29)-H(29B)  | 109.5      |
| C(24)-C(25)-H(25B)  | 109.5      | H(29A)-C(29)-H(29B) | 109.5      |
| H(25A)-C(25)-H(25B) | 109.5      | C(28)-C(29)-H(29C)  | 109.5      |
| C(24)-C(25)-H(25C)  | 109.5      | H(29A)-C(29)-H(29C) | 109.5      |
| H(25A)-C(25)-H(25C) | 109.5      | H(29B)-C(29)-H(29C) | 109.5      |
| H(25B)-C(25)-H(25C) | 109.5      | C(28)-C(30)-H(30A)  | 109.5      |
| C(24)-C(26)-H(26A)  | 109.5      | C(28)-C(30)-H(30B)  | 109.5      |
| C(24)-C(26)-H(26B)  | 109.5      | H(30A)-C(30)-H(30B) | 109.5      |
| H(26A)-C(26)-H(26B) | 109.5      | C(28)-C(30)-H(30C)  | 109.5      |
| C(24)-C(26)-H(26C)  | 109.5      | H(30A)-C(30)-H(30C) | 109.5      |
| H(26A)-C(26)-H(26C) | 109.5      | H(30B)-C(30)-H(30C) | 109.5      |
| H(26B)-C(26)-H(26C) | 109.5      | C(28)-C(31)-H(31A)  | 109.5      |
| C(24)-C(27)-H(27A)  | 109.5      | C(28)-C(31)-H(31B)  | 109.5      |
| C(24)-C(27)-H(27B)  | 109.5      | H(31A)-C(31)-H(31B) | 109.5      |
| H(27A)-C(27)-H(27B) | 109.5      | C(28)-C(31)-H(31C)  | 109.5      |
| C(24)-C(27)-H(27C)  | 109.5      | H(31A)-C(31)-H(31C) | 109.5      |
| H(27A)-C(27)-H(27C) | 109.5      | H(31B)-C(31)-H(31C) | 109.5      |
| H(27B)-C(27)-H(27C) | 109.5      |                     |            |

---

Table B5. Anisotropic displacement parameters ( $\text{\AA}^2 \times 10^3$ ) for (**<sup>t</sup>Bu<sub>xan</sub>POP**)RhCl. The anisotropic displacement factor exponent takes the form:  $-2\pi^2 [ h^2 a^{*2} U^{11} + \dots + 2 h k a^* b^* U^{12} ]$

|       | U <sup>11</sup> | U <sup>22</sup> | U <sup>33</sup> | U <sup>23</sup> | U <sup>13</sup> | U <sup>12</sup> |
|-------|-----------------|-----------------|-----------------|-----------------|-----------------|-----------------|
| Rh(1) | 17(1)           | 14(1)           | 12(1)           | 0(1)            | 7(1)            | -2(1)           |
| P(1)  | 16(1)           | 11(1)           | 12(1)           | 0(1)            | 7(1)            | 0(1)            |
| P(2)  | 16(1)           | 13(1)           | 14(1)           | -1(1)           | 7(1)            | -3(1)           |
| Cl(1) | 33(1)           | 27(1)           | 16(1)           | -5(1)           | 9(1)            | -12(1)          |
| O(1)  | 19(1)           | 14(1)           | 11(1)           | -1(1)           | 7(1)            | -4(1)           |
| C(1)  | 16(1)           | 11(1)           | 17(1)           | 2(1)            | 5(1)            | 1(1)            |
| C(2)  | 19(1)           | 13(1)           | 16(1)           | 0(1)            | 8(1)            | 1(1)            |
| C(3)  | 26(1)           | 18(1)           | 22(1)           | -1(1)           | 13(1)           | -3(1)           |
| C(4)  | 31(2)           | 19(1)           | 30(2)           | -6(1)           | 15(1)           | -11(1)          |
| C(5)  | 33(2)           | 16(1)           | 24(1)           | -7(1)           | 12(1)           | -7(1)           |
| C(6)  | 20(1)           | 12(1)           | 17(1)           | -1(1)           | 7(1)            | -1(1)           |
| C(7)  | 22(1)           | 15(1)           | 12(1)           | -1(1)           | 6(1)            | 2(1)            |
| C(8)  | 19(1)           | 17(1)           | 12(1)           | -1(1)           | 6(1)            | 1(1)            |
| C(9)  | 34(2)           | 23(1)           | 14(1)           | -3(1)           | 9(1)            | -4(1)           |
| C(10) | 42(2)           | 27(2)           | 14(1)           | 2(1)            | 13(1)           | -6(1)           |
| C(11) | 30(1)           | 18(1)           | 20(1)           | 1(1)            | 10(1)           | -6(1)           |
| C(12) | 16(1)           | 17(1)           | 15(1)           | 0(1)            | 7(1)            | -1(1)           |
| C(13) | 15(1)           | 13(1)           | 14(1)           | 3(1)            | 6(1)            | 2(1)            |
| C(14) | 32(2)           | 24(1)           | 24(1)           | 4(1)            | 14(1)           | 11(1)           |
| C(15) | 37(2)           | 20(1)           | 16(1)           | -3(1)           | 7(1)            | -8(1)           |
| C(16) | 16(1)           | 16(1)           | 17(1)           | 0(1)            | 8(1)            | 2(1)            |
| C(17) | 26(1)           | 20(1)           | 23(1)           | -4(1)           | 10(1)           | 4(1)            |
| C(18) | 26(1)           | 22(1)           | 40(2)           | 1(1)            | 22(1)           | -1(1)           |
| C(19) | 22(1)           | 28(2)           | 21(1)           | 4(1)            | 6(1)            | 8(1)            |
| C(20) | 21(1)           | 14(1)           | 18(1)           | 4(1)            | 8(1)            | 5(1)            |
| C(21) | 30(1)           | 24(1)           | 15(1)           | 4(1)            | 6(1)            | 7(1)            |
| C(22) | 34(2)           | 24(2)           | 38(2)           | 15(1)           | 7(1)            | -1(1)           |
| C(23) | 30(2)           | 31(2)           | 24(2)           | 4(1)            | 12(1)           | 16(1)           |
| C(24) | 25(1)           | 14(1)           | 18(1)           | 0(1)            | 10(1)           | -2(1)           |
| C(25) | 35(2)           | 23(2)           | 28(2)           | -1(1)           | 12(1)           | 1(1)            |
| C(26) | 42(2)           | 23(2)           | 35(2)           | 9(1)            | 24(1)           | 2(1)            |

|       |       |       |       |        |       |        |
|-------|-------|-------|-------|--------|-------|--------|
| C(27) | 26(1) | 26(2) | 37(2) | 1(1)   | 12(1) | 4(1)   |
| C(28) | 17(1) | 24(1) | 21(1) | -4(1)  | 8(1)  | -3(1)  |
| C(29) | 19(1) | 54(2) | 32(2) | -14(2) | 9(1)  | -10(1) |
| C(30) | 25(1) | 34(2) | 37(2) | 0(1)   | 20(1) | 0(1)   |
| C(31) | 21(1) | 33(2) | 43(2) | 8(1)   | 6(1)  | 7(1)   |

---



Table B6. Hydrogen coordinates ( $\times 10^4$ ) and isotropic displacement parameters ( $\text{\AA}^2 \times 10^{-3}$ )  
for (**<sup>t</sup>Bu<sub>x</sub>anPOP**)RhCl.

|        | x     | y    | z    | U(eq) |
|--------|-------|------|------|-------|
| H(3)   | 5     | 3734 | 2907 | 25    |
| H(4)   | -668  | 2884 | 1786 | 31    |
| H(5)   | 90    | 3022 | 661  | 28    |
| H(9)   | 2037  | 4871 | -922 | 28    |
| H(10)  | 2823  | 6138 | -994 | 32    |
| H(11)  | 3532  | 6905 | 194  | 26    |
| H(14A) | 3439  | 3596 | 226  | 38    |
| H(14B) | 2821  | 2990 | 718  | 38    |
| H(14C) | 3552  | 3756 | 1177 | 38    |
| H(15A) | 173   | 3994 | -592 | 37    |
| H(15B) | 776   | 3135 | -341 | 37    |
| H(15C) | 1373  | 3735 | -851 | 37    |
| H(17A) | 80    | 6559 | 4191 | 34    |
| H(17B) | 1432  | 6553 | 4063 | 34    |
| H(17C) | 1120  | 5957 | 4711 | 34    |
| H(18A) | -1287 | 5398 | 3798 | 41    |
| H(18B) | -229  | 4760 | 4206 | 41    |
| H(18C) | -983  | 4700 | 3245 | 41    |
| H(19A) | -619  | 5626 | 2243 | 36    |
| H(19B) | 334   | 6351 | 2522 | 36    |
| H(19C) | -954  | 6359 | 2741 | 36    |
| H(21A) | 2420  | 5024 | 5226 | 35    |
| H(21B) | 3461  | 5382 | 4858 | 35    |
| H(21C) | 3728  | 4581 | 5391 | 35    |
| H(22A) | 2392  | 3386 | 4857 | 49    |
| H(22B) | 1579  | 3344 | 3907 | 49    |
| H(22C) | 1121  | 3877 | 4543 | 49    |
| H(23A) | 4152  | 4529 | 3825 | 41    |
| H(23B) | 3351  | 3763 | 3432 | 41    |
| H(23C) | 4192  | 3752 | 4377 | 41    |

|        |      |      |      |    |
|--------|------|------|------|----|
| H(25A) | 2832 | 8635 | 2496 | 42 |
| H(25B) | 4117 | 8180 | 2900 | 42 |
| H(25C) | 2834 | 7780 | 2912 | 42 |
| H(26A) | 3348 | 8775 | 1213 | 46 |
| H(26B) | 3611 | 8017 | 719  | 46 |
| H(26C) | 4622 | 8292 | 1555 | 46 |
| H(27A) | 1321 | 7293 | 1594 | 43 |
| H(27B) | 1604 | 7455 | 737  | 43 |
| H(27C) | 1340 | 8184 | 1267 | 43 |
| H(29A) | 5744 | 6986 | 3317 | 52 |
| H(29B) | 5986 | 7644 | 2699 | 52 |
| H(29C) | 6987 | 6956 | 3045 | 52 |
| H(30A) | 6818 | 6726 | 1556 | 44 |
| H(30B) | 5656 | 7307 | 1204 | 44 |
| H(30C) | 5555 | 6392 | 935  | 44 |
| H(31A) | 5260 | 5347 | 1879 | 50 |
| H(31B) | 5474 | 5549 | 2834 | 50 |
| H(31C) | 6615 | 5586 | 2455 | 50 |

---

Table B7. Torsion angles [°] for (<sup>t</sup>Bu<sub>x</sub>anPOP)RhCl.

|                        |             |                         |           |
|------------------------|-------------|-------------------------|-----------|
| O(1)-Rh(1)-P(1)-C(2)   | -2.54(9)    | Rh(1)-P(1)-C(2)-C(1)    | 4.4(2)    |
| P(2)-Rh(1)-P(1)-C(2)   | 32.24(13)   | C(20)-P(1)-C(2)-C(3)    | 58.3(2)   |
| Cl(1)-Rh(1)-P(1)-C(2)  | -175.37(8)  | C(16)-P(1)-C(2)-C(3)    | -61.0(2)  |
| O(1)-Rh(1)-P(1)-C(20)  | 109.44(11)  | Rh(1)-P(1)-C(2)-C(3)    | -179.0(2) |
| P(2)-Rh(1)-P(1)-C(20)  | 144.23(12)  | C(1)-C(2)-C(3)-C(4)     | 0.3(4)    |
| Cl(1)-Rh(1)-P(1)-C(20) | -63.38(10)  | P(1)-C(2)-C(3)-C(4)     | -176.4(2) |
| O(1)-Rh(1)-P(1)-C(16)  | -113.60(10) | C(2)-C(3)-C(4)-C(5)     | 1.6(4)    |
| P(2)-Rh(1)-P(1)-C(16)  | -78.81(13)  | C(3)-C(4)-C(5)-C(6)     | -0.9(5)   |
| Cl(1)-Rh(1)-P(1)-C(16) | 73.58(9)    | C(4)-C(5)-C(6)-C(1)     | -1.5(4)   |
| O(1)-Rh(1)-P(2)-C(12)  | 7.88(9)     | C(4)-C(5)-C(6)-C(7)     | 173.5(3)  |
| P(1)-Rh(1)-P(2)-C(12)  | -26.95(13)  | C(2)-C(1)-C(6)-C(5)     | 3.5(4)    |
| Cl(1)-Rh(1)-P(2)-C(12) | -179.40(8)  | O(1)-C(1)-C(6)-C(5)     | -178.6(2) |
| O(1)-Rh(1)-P(2)-C(28)  | -101.11(11) | C(2)-C(1)-C(6)-C(7)     | -171.6(2) |
| P(1)-Rh(1)-P(2)-C(28)  | -135.94(12) | O(1)-C(1)-C(6)-C(7)     | 6.4(4)    |
| Cl(1)-Rh(1)-P(2)-C(28) | 71.61(10)   | C(5)-C(6)-C(7)-C(8)     | 154.7(2)  |
| O(1)-Rh(1)-P(2)-C(24)  | 121.61(11)  | C(1)-C(6)-C(7)-C(8)     | -30.4(3)  |
| P(1)-Rh(1)-P(2)-C(24)  | 86.78(13)   | C(5)-C(6)-C(7)-C(15)    | 30.2(3)   |
| Cl(1)-Rh(1)-P(2)-C(24) | -65.67(10)  | C(1)-C(6)-C(7)-C(15)    | -154.9(2) |
| P(2)-Rh(1)-O(1)-C(1)   | -169.89(16) | C(5)-C(6)-C(7)-C(14)    | -89.3(3)  |
| P(1)-Rh(1)-O(1)-C(1)   | 1.20(15)    | C(1)-C(6)-C(7)-C(14)    | 85.5(3)   |
| Cl(1)-Rh(1)-O(1)-C(1)  | 101.6(4)    | C(6)-C(7)-C(8)-C(9)     | -155.7(2) |
| P(2)-Rh(1)-O(1)-C(13)  | -6.23(15)   | C(15)-C(7)-C(8)-C(9)    | -31.5(3)  |
| P(1)-Rh(1)-O(1)-C(13)  | 164.86(16)  | C(14)-C(7)-C(8)-C(9)    | 87.7(3)   |
| Cl(1)-Rh(1)-O(1)-C(13) | -94.7(4)    | C(6)-C(7)-C(8)-C(13)    | 32.3(3)   |
| C(13)-O(1)-C(1)-C(2)   | -162.5(2)   | C(15)-C(7)-C(8)-C(13)   | 156.5(2)  |
| Rh(1)-O(1)-C(1)-C(2)   | 1.4(3)      | C(14)-C(7)-C(8)-C(13)   | -84.2(3)  |
| C(13)-O(1)-C(1)-C(6)   | 19.4(3)     | C(13)-C(8)-C(9)-C(10)   | 1.1(4)    |
| Rh(1)-O(1)-C(1)-C(6)   | -176.67(17) | C(7)-C(8)-C(9)-C(10)    | -171.2(3) |
| C(6)-C(1)-C(2)-C(3)    | -2.9(4)     | C(8)-C(9)-C(10)-C(11)   | 2.4(5)    |
| O(1)-C(1)-C(2)-C(3)    | 179.1(2)    | C(9)-C(10)-C(11)-C(12)  | -2.3(5)   |
| C(6)-C(1)-C(2)-P(1)    | 173.91(19)  | C(10)-C(11)-C(12)-C(13) | -1.1(4)   |
| O(1)-C(1)-C(2)-P(1)    | -4.1(3)     | C(10)-C(11)-C(12)-P(2)  | 173.6(2)  |
| C(20)-P(1)-C(2)-C(1)   | -118.3(2)   | C(28)-P(2)-C(12)-C(11)  | -66.6(3)  |
| C(16)-P(1)-C(2)-C(1)   | 122.4(2)    | C(24)-P(2)-C(12)-C(11)  | 51.9(3)   |

|                        |             |                        |            |
|------------------------|-------------|------------------------|------------|
| Rh(1)-P(2)-C(12)-C(11) | 174.2(2)    | Rh(1)-P(2)-C(24)-C(26) | 173.70(19) |
| C(28)-P(2)-C(12)-C(13) | 108.1(2)    | C(12)-P(2)-C(24)-C(25) | 160.77(19) |
| C(24)-P(2)-C(12)-C(13) | -133.4(2)   | C(28)-P(2)-C(24)-C(25) | -88.5(2)   |
| Rh(1)-P(2)-C(12)-C(13) | -11.1(2)    | Rh(1)-P(2)-C(24)-C(25) | 49.7(2)    |
| C(9)-C(8)-C(13)-C(12)  | -4.7(4)     | C(12)-P(2)-C(24)-C(27) | 46.5(2)    |
| C(7)-C(8)-C(13)-C(12)  | 167.6(2)    | C(28)-P(2)-C(24)-C(27) | 157.15(18) |
| C(9)-C(8)-C(13)-O(1)   | 177.4(2)    | Rh(1)-P(2)-C(24)-C(27) | -64.65(19) |
| C(7)-C(8)-C(13)-O(1)   | -10.3(3)    | C(12)-P(2)-C(28)-C(31) | -71.9(2)   |
| C(11)-C(12)-C(13)-C(8) | 4.8(4)      | C(24)-P(2)-C(28)-C(31) | 175.35(19) |
| P(2)-C(12)-C(13)-C(8)  | -170.27(19) | Rh(1)-P(2)-C(28)-C(31) | 36.4(2)    |
| C(11)-C(12)-C(13)-O(1) | -177.3(2)   | C(12)-P(2)-C(28)-C(30) | 48.2(2)    |
| P(2)-C(12)-C(13)-O(1)  | 7.7(3)      | C(24)-P(2)-C(28)-C(30) | -64.6(2)   |
| C(1)-O(1)-C(13)-C(8)   | -17.5(3)    | Rh(1)-P(2)-C(28)-C(30) | 156.45(19) |
| Rh(1)-O(1)-C(13)-C(8)  | 178.61(17)  | C(12)-P(2)-C(28)-C(29) | 171.3(2)   |
| C(1)-O(1)-C(13)-C(12)  | 164.5(2)    | C(24)-P(2)-C(28)-C(29) | 58.6(2)    |
| Rh(1)-O(1)-C(13)-C(12) | 0.6(3)      | Rh(1)-P(2)-C(28)-C(29) | -80.4(2)   |
| C(2)-P(1)-C(16)-C(19)  | -58.8(2)    |                        |            |
| C(20)-P(1)-C(16)-C(19) | -171.54(17) |                        |            |
| Rh(1)-P(1)-C(16)-C(19) | 49.41(19)   |                        |            |
| C(2)-P(1)-C(16)-C(17)  | -174.95(18) |                        |            |
| C(20)-P(1)-C(16)-C(17) | 72.3(2)     |                        |            |
| Rh(1)-P(1)-C(16)-C(17) | -66.76(19)  |                        |            |
| C(2)-P(1)-C(16)-C(18)  | 61.6(2)     |                        |            |
| C(20)-P(1)-C(16)-C(18) | -51.2(2)    |                        |            |
| Rh(1)-P(1)-C(16)-C(18) | 169.79(18)  |                        |            |
| C(2)-P(1)-C(20)-C(21)  | -177.97(18) |                        |            |
| C(16)-P(1)-C(20)-C(21) | -64.8(2)    |                        |            |
| Rh(1)-P(1)-C(20)-C(21) | 72.26(19)   |                        |            |
| C(2)-P(1)-C(20)-C(23)  | 67.4(2)     |                        |            |
| C(16)-P(1)-C(20)-C(23) | -179.39(18) |                        |            |
| Rh(1)-P(1)-C(20)-C(23) | -42.4(2)    |                        |            |
| C(2)-P(1)-C(20)-C(22)  | -52.3(2)    |                        |            |
| C(16)-P(1)-C(20)-C(22) | 60.9(3)     |                        |            |
| Rh(1)-P(1)-C(20)-C(22) | -162.1(2)   |                        |            |
| C(12)-P(2)-C(24)-C(26) | -75.2(2)    |                        |            |
| C(28)-P(2)-C(24)-C(26) | 35.5(3)     |                        |            |



Figure C1: ORTEP diagram of (<sup>t</sup>Bu<sub>2</sub>furPOP)RhCl.

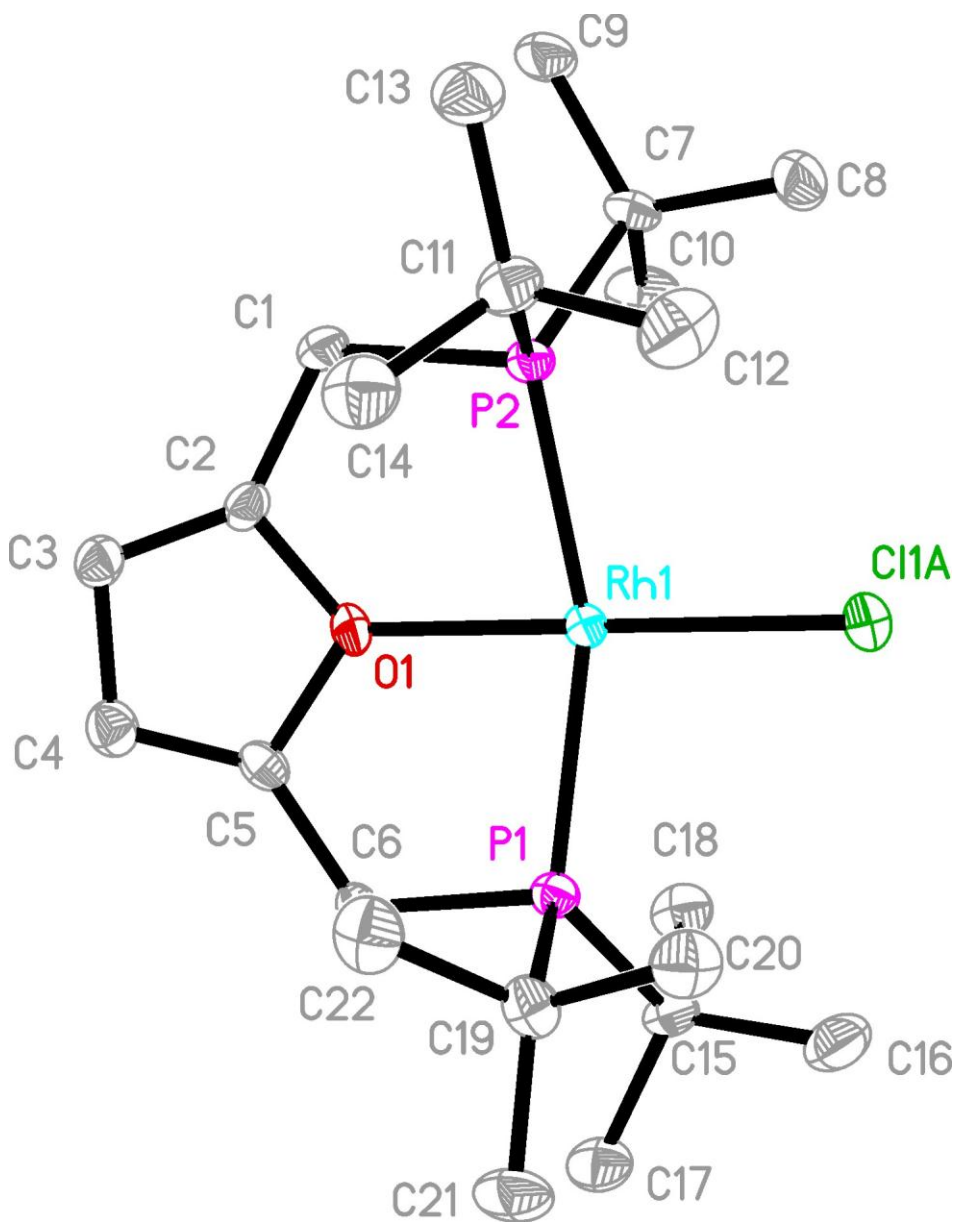

Table C2. Crystal data and structure refinement for (<sup>t</sup>Bu<sub>2</sub>furPOP)RhCl.

|                                   |                                                                                          |                    |
|-----------------------------------|------------------------------------------------------------------------------------------|--------------------|
| Identification code               | mh308a                                                                                   |                    |
| Empirical formula                 | C <sub>22</sub> H <sub>44</sub> Br <sub>0.13</sub> Cl <sub>0.87</sub> O <sub>P2</sub> Rh |                    |
| Formula weight                    | 530.65                                                                                   |                    |
| Temperature                       | 100(2) K                                                                                 |                    |
| Wavelength                        | 0.71073 Å                                                                                |                    |
| Crystal system                    | Monoclinic                                                                               |                    |
| Space group                       | P2(1)                                                                                    |                    |
| Unit cell dimensions              | a = 15.1224(11) Å                                                                        | α = 90°.           |
|                                   | b = 11.4949(9) Å                                                                         | β = 115.2170(10)°. |
|                                   | c = 15.8733(12) Å                                                                        | γ = 90°.           |
| Volume                            | 2496.3(3) Å <sup>3</sup>                                                                 |                    |
| Z                                 | 4                                                                                        |                    |
| Density (calculated)              | 1.412 Mg/m <sup>3</sup>                                                                  |                    |
| Absorption coefficient            | 1.124 mm <sup>-1</sup>                                                                   |                    |
| F(000)                            | 1113                                                                                     |                    |
| Crystal size                      | 0.25 x 0.20 x 0.05 mm <sup>3</sup>                                                       |                    |
| Theta range for data collection   | 2.27 to 30.03°.                                                                          |                    |
| Index ranges                      | -21 ≤ h ≤ 21, -16 ≤ k ≤ 16, -21 ≤ l ≤ 22                                                 |                    |
| Reflections collected             | 24848                                                                                    |                    |
| Independent reflections           | 13915 [R(int) = 0.0336]                                                                  |                    |
| Completeness to theta = 30.03°    | 98.9 %                                                                                   |                    |
| Absorption correction             | Semi-empirical from equivalents                                                          |                    |
| Max. and min. transmission        | 0.9460 and 0.7665                                                                        |                    |
| Refinement method                 | Full-matrix least-squares on F <sup>2</sup>                                              |                    |
| Data / restraints / parameters    | 13915 / 38 / 526                                                                         |                    |
| Goodness-of-fit on F <sup>2</sup> | 1.009                                                                                    |                    |
| Final R indices [I > 2σ(I)]       | R1 = 0.0523, wR2 = 0.1186                                                                |                    |
| R indices (all data)              | R1 = 0.0572, wR2 = 0.1212                                                                |                    |
| Absolute structure parameter      | 0.50(3)                                                                                  |                    |
| Largest diff. peak and hole       | 2.191 and -1.227 e.Å <sup>-3</sup>                                                       |                    |

Table C3. Atomic coordinates ( $\times 10^4$ ) and equivalent isotropic displacement parameters ( $\text{\AA}^2 \times 10^3$ )

for (**<sup>t</sup>Bu<sub>3</sub>furPOP**)RhCl. U(eq) is defined as one third of the trace of the orthogonalized  $U^{ij}$  tensor.

|        | x       | y        | z       | U(eq) |
|--------|---------|----------|---------|-------|
| Rh(1)  | 5044(1) | 133(1)   | 2215(1) | 15(1) |
| Cl(1A) | 6470(1) | -683(1)  | 3412(1) | 27(1) |
| Br(1B) | 6470(1) | -683(1)  | 3412(1) | 27(1) |
| P(1)   | 4498(1) | -1510(1) | 1323(1) | 16(1) |
| P(2)   | 5025(1) | 1873(1)  | 2912(1) | 17(1) |
| O(1)   | 3855(2) | 873(3)   | 1120(2) | 19(1) |
| C(1)   | 4052(4) | 2701(4)  | 1932(4) | 20(1) |
| C(2)   | 3404(3) | 1899(4)  | 1185(3) | 17(1) |
| C(3)   | 2488(4) | 1923(4)  | 507(4)  | 20(1) |
| C(4)   | 2349(4) | 854(5)   | -12(4)  | 23(1) |
| C(5)   | 3177(3) | 234(4)   | 372(3)  | 18(1) |
| C(6)   | 3544(3) | -911(4)  | 212(3)  | 17(1) |
| C(7)   | 6095(4) | 2901(4)  | 3274(4) | 21(1) |
| C(8)   | 6900(4) | 2465(5)  | 4178(4) | 31(1) |
| C(9)   | 5866(4) | 4182(4)  | 3351(4) | 28(1) |
| C(10)  | 6447(4) | 2786(5)  | 2491(4) | 32(1) |
| C(11)  | 4536(4) | 1793(4)  | 3821(4) | 24(1) |
| C(12)  | 5137(5) | 907(5)   | 4561(4) | 35(1) |
| C(13)  | 4509(4) | 2945(5)  | 4291(4) | 30(1) |
| C(14)  | 3482(4) | 1331(5)  | 3324(4) | 33(1) |
| C(15)  | 5264(4) | -2389(4) | 875(4)  | 21(1) |
| C(16)  | 6005(4) | -3120(5) | 1683(4) | 33(1) |
| C(17)  | 4694(4) | -3161(5) | 36(4)   | 28(1) |
| C(18)  | 5837(4) | -1475(5) | 601(4)  | 28(1) |
| C(19)  | 3793(4) | -2491(5) | 1762(4) | 23(1) |



|        |          |          |         |       |
|--------|----------|----------|---------|-------|
| C(20)  | 4439(4)  | -2770(5) | 2797(4) | 29(1) |
| C(21)  | 3428(4)  | -3611(5) | 1226(4) | 31(1) |
| C(22)  | 2901(4)  | -1782(5) | 1715(4) | 31(1) |
| Rh(2)  | 172(1)   | 2438(1)  | 2455(1) | 16(1) |
| Cl(2A) | -981(1)  | 3177(1)  | 1032(1) | 26(1) |
| Br(2B) | -981(1)  | 3177(1)  | 1032(1) | 26(1) |
| P(3)   | 670(1)   | 4143(1)  | 3255(1) | 21(1) |
| P(4)   | -147(1)  | 512(1)   | 2103(1) | 17(1) |
| O(2)   | 1264(3)  | 1769(3)  | 3656(3) | 27(1) |
| C(23)  | 944(4)   | -179(4)  | 3031(4) | 26(1) |
| C(24)  | 1413(4)  | 590(5)   | 3861(4) | 25(1) |
| C(25)  | 1984(4)  | 494(5)   | 4768(4) | 34(1) |
| C(26)  | 2214(4)  | 1634(5)  | 5172(4) | 33(1) |
| C(27)  | 1759(4)  | 2398(5)  | 4482(3) | 27(1) |
| C(28)  | 1708(5)  | 3676(5)  | 4360(4) | 35(1) |
| C(29)  | -125(4)  | -119(4)  | 1023(4) | 23(1) |
| C(30)  | -1100(4) | 133(5)   | 196(3)  | 28(1) |
| C(31)  | 106(4)   | -1416(5) | 1058(4) | 30(1) |
| C(32)  | 674(4)   | 565(5)   | 873(4)  | 33(1) |
| C(33)  | -1189(4) | -45(4)   | 2324(4) | 22(1) |
| C(34)  | -2118(4) | 642(4)   | 1711(4) | 26(1) |
| C(35)  | -1400(4) | -1362(4) | 2161(4) | 28(1) |
| C(36)  | -951(4)  | 233(5)   | 3335(4) | 31(1) |
| C(37)  | -209(5)  | 4833(5)  | 3648(4) | 31(1) |
| C(38)  | -1163(4) | 5115(7)  | 2808(5) | 43(1) |
| C(39)  | 165(5)   | 5916(5)  | 4261(4) | 38(1) |
| C(40)  | -426(6)  | 3868(6)  | 4221(5) | 48(2) |
| C(41)  | 1292(4)  | 5236(5)  | 2811(4) | 23(1) |
| C(42)  | 520(4)   | 5817(5)  | 1950(4) | 30(1) |
| C(43)  | 1926(5)  | 6141(6)  | 3515(5) | 42(2) |
| C(44)  | 1958(4)  | 4499(5)  | 2495(5) | 36(1) |

Table C4. Bond lengths [Å] and angles [°] for (*t*Bu<sub>3</sub>POP)RhCl.

|              |            |              |          |
|--------------|------------|--------------|----------|
| Rh(1)-O(1)   | 2.077(3)   | C(8)-H(8A)   | 0.9800   |
| Rh(1)-P(2)   | 2.2915(12) | C(8)-H(8B)   | 0.9800   |
| Rh(1)-P(1)   | 2.2924(12) | C(8)-H(8C)   | 0.9800   |
| Rh(1)-Cl(1A) | 2.3777(11) | C(9)-H(9A)   | 0.9800   |
| Rh(1)-H(101) | 1.549(15)  | C(9)-H(9B)   | 0.9800   |
| Rh(1)-H(102) | 1.548(18)  | C(9)-H(9C)   | 0.9800   |
| P(1)-C(6)    | 1.870(5)   | C(10)-H(10A) | 0.9800   |
| P(1)-C(19)   | 1.877(5)   | C(10)-H(10B) | 0.9800   |
| P(1)-C(15)   | 1.890(5)   | C(10)-H(10C) | 0.9800   |
| P(2)-C(1)    | 1.881(5)   | C(11)-C(12)  | 1.528(8) |
| P(2)-C(11)   | 1.883(5)   | C(11)-C(13)  | 1.529(7) |
| P(2)-C(7)    | 1.885(5)   | C(11)-C(14)  | 1.541(8) |
| O(1)-C(2)    | 1.387(5)   | C(12)-H(12A) | 0.9800   |
| O(1)-C(5)    | 1.401(5)   | C(12)-H(12B) | 0.9800   |
| C(1)-C(2)    | 1.492(7)   | C(12)-H(12C) | 0.9800   |
| C(1)-H(1A)   | 0.9900     | C(13)-H(13A) | 0.9800   |
| C(1)-H(1B)   | 0.9900     | C(13)-H(13B) | 0.9800   |
| C(2)-C(3)    | 1.345(7)   | C(13)-H(13C) | 0.9800   |
| C(3)-C(4)    | 1.444(7)   | C(14)-H(14A) | 0.9800   |
| C(3)-H(3)    | 0.9500     | C(14)-H(14B) | 0.9800   |
| C(4)-C(5)    | 1.341(7)   | C(14)-H(14C) | 0.9800   |
| C(4)-H(4)    | 0.9500     | C(15)-C(17)  | 1.525(7) |
| C(5)-C(6)    | 1.492(7)   | C(15)-C(18)  | 1.539(7) |
| C(6)-H(6A)   | 0.9900     | C(15)-C(16)  | 1.543(8) |
| C(6)-H(6B)   | 0.9900     | C(16)-H(16A) | 0.9800   |
| C(7)-C(8)    | 1.518(7)   | C(16)-H(16B) | 0.9800   |
| C(7)-C(9)    | 1.530(7)   | C(16)-H(16C) | 0.9800   |
| C(7)-C(10)   | 1.552(7)   | C(17)-H(17A) | 0.9800   |

|              |            |              |          |
|--------------|------------|--------------|----------|
| C(17)-H(17B) | 0.9800     | C(23)-C(24)  | 1.491(8) |
| C(17)-H(17C) | 0.9800     | C(23)-H(23A) | 0.9900   |
| C(18)-H(18A) | 0.9800     | C(23)-H(23B) | 0.9900   |
| C(18)-H(18B) | 0.9800     | C(24)-C(25)  | 1.331(8) |
| C(18)-H(18C) | 0.9800     | C(25)-C(26)  | 1.435(9) |
| C(19)-C(21)  | 1.513(8)   | C(25)-H(25)  | 0.9500   |
| C(19)-C(20)  | 1.546(7)   | C(26)-C(27)  | 1.342(8) |
| C(19)-C(22)  | 1.550(7)   | C(26)-H(26)  | 0.9500   |
| C(20)-H(20A) | 0.9800     | C(27)-C(28)  | 1.480(8) |
| C(20)-H(20B) | 0.9800     | C(28)-H(28A) | 0.9900   |
| C(20)-H(20C) | 0.9800     | C(28)-H(28B) | 0.9900   |
| C(21)-H(21A) | 0.9800     | C(29)-C(31)  | 1.527(7) |
| C(21)-H(21B) | 0.9800     | C(29)-C(30)  | 1.528(7) |
| C(21)-H(21C) | 0.9800     | C(29)-C(32)  | 1.542(7) |
| C(22)-H(22A) | 0.9800     | C(30)-H(30A) | 0.9800   |
| C(22)-H(22B) | 0.9800     | C(30)-H(30B) | 0.9800   |
| C(22)-H(22C) | 0.9800     | C(30)-H(30C) | 0.9800   |
| Rh(2)-O(2)   | 2.067(4)   | C(31)-H(31A) | 0.9800   |
| Rh(2)-P(3)   | 2.2817(13) | C(31)-H(31B) | 0.9800   |
| Rh(2)-P(4)   | 2.2835(13) | C(31)-H(31C) | 0.9800   |
| Rh(2)-Cl(2A) | 2.3470(11) | C(32)-H(32A) | 0.9800   |
| Rh(2)-H(201) | 1.508(17)  | C(32)-H(32B) | 0.9800   |
| Rh(2)-H(202) | 1.548(17)  | C(32)-H(32C) | 0.9800   |
| P(3)-C(28)   | 1.866(6)   | C(33)-C(36)  | 1.521(7) |
| P(3)-C(37)   | 1.869(6)   | C(33)-C(34)  | 1.543(7) |
| P(3)-C(41)   | 1.878(5)   | C(33)-C(35)  | 1.547(7) |
| P(4)-C(23)   | 1.858(5)   | C(34)-H(34A) | 0.9800   |
| P(4)-C(33)   | 1.869(5)   | C(34)-H(34B) | 0.9800   |
| P(4)-C(29)   | 1.874(5)   | C(34)-H(34C) | 0.9800   |
| O(2)-C(24)   | 1.390(6)   | C(35)-H(35A) | 0.9800   |
| O(2)-C(27)   | 1.402(6)   | C(35)-H(35B) | 0.9800   |

|                     |            |                  |            |
|---------------------|------------|------------------|------------|
| C(35)-H(35C)        | 0.9800     | C(40)-H(40B)     | 0.9800     |
| C(36)-H(36A)        | 0.9800     | C(40)-H(40C)     | 0.9800     |
| C(36)-H(36B)        | 0.9800     | C(41)-C(42)      | 1.522(8)   |
| C(36)-H(36C)        | 0.9800     | C(41)-C(43)      | 1.528(8)   |
| C(37)-C(38)         | 1.526(9)   | C(41)-C(44)      | 1.553(8)   |
| C(37)-C(39)         | 1.532(8)   | C(42)-H(42A)     | 0.9800     |
| C(37)-C(40)         | 1.555(8)   | C(42)-H(42B)     | 0.9800     |
| C(38)-H(38A)        | 0.9800     | C(42)-H(42C)     | 0.9800     |
| C(38)-H(38B)        | 0.9800     | C(43)-H(43A)     | 0.9800     |
| C(38)-H(38C)        | 0.9800     | C(43)-H(43B)     | 0.9800     |
| C(39)-H(39A)        | 0.9800     | C(43)-H(43C)     | 0.9800     |
| C(39)-H(39B)        | 0.9800     | C(44)-H(44A)     | 0.9800     |
| C(39)-H(39C)        | 0.9800     | C(44)-H(44B)     | 0.9800     |
| C(40)-H(40A)        | 0.9800     | C(44)-H(44C)     | 0.9800     |
| O(1)-Rh(1)-P(2)     | 82.09(10)  | C(6)-P(1)-C(15)  | 101.1(2)   |
| O(1)-Rh(1)-P(1)     | 82.25(10)  | C(19)-P(1)-C(15) | 110.7(2)   |
| P(2)-Rh(1)-P(1)     | 160.34(4)  | C(6)-P(1)-Rh(1)  | 102.07(15) |
| O(1)-Rh(1)-Cl(1A)   | 176.07(10) | C(19)-P(1)-Rh(1) | 112.21(18) |
| P(2)-Rh(1)-Cl(1A)   | 98.74(4)   | C(15)-P(1)-Rh(1) | 123.76(16) |
| P(1)-Rh(1)-Cl(1A)   | 97.69(4)   | C(1)-P(2)-C(11)  | 103.5(2)   |
| O(1)-Rh(1)-H(101)   | 99.5(9)    | C(1)-P(2)-C(7)   | 101.7(2)   |
| P(2)-Rh(1)-H(101)   | 84.3(7)    | C(11)-P(2)-C(7)  | 111.3(2)   |
| P(1)-Rh(1)-H(101)   | 86.6(8)    | C(1)-P(2)-Rh(1)  | 102.04(15) |
| Cl(1A)-Rh(1)-H(101) | 84.4(9)    | C(11)-P(2)-Rh(1) | 114.67(17) |
| O(1)-Rh(1)-H(102)   | 92.2(10)   | C(7)-P(2)-Rh(1)  | 120.57(16) |
| P(2)-Rh(1)-H(102)   | 97.2(11)   | C(2)-O(1)-C(5)   | 107.7(4)   |
| P(1)-Rh(1)-H(102)   | 95.2(11)   | C(2)-O(1)-Rh(1)  | 124.3(3)   |
| Cl(1A)-Rh(1)-H(102) | 83.8(10)   | C(5)-O(1)-Rh(1)  | 123.7(3)   |
| H(101)-Rh(1)-H(102) | 168.3(13)  | C(2)-C(1)-P(2)   | 111.2(3)   |
| C(6)-P(1)-C(19)     | 103.9(2)   | C(2)-C(1)-H(1A)  | 109.4      |

|                  |          |                     |          |
|------------------|----------|---------------------|----------|
| P(2)-C(1)-H(1A)  | 109.4    | C(7)-C(8)-H(8C)     | 109.5    |
| C(2)-C(1)-H(1B)  | 109.4    | H(8A)-C(8)-H(8C)    | 109.5    |
| P(2)-C(1)-H(1B)  | 109.4    | H(8B)-C(8)-H(8C)    | 109.5    |
| H(1A)-C(1)-H(1B) | 108.0    | C(7)-C(9)-H(9A)     | 109.5    |
| C(3)-C(2)-O(1)   | 109.2(4) | C(7)-C(9)-H(9B)     | 109.5    |
| C(3)-C(2)-C(1)   | 136.7(4) | H(9A)-C(9)-H(9B)    | 109.5    |
| O(1)-C(2)-C(1)   | 114.1(4) | C(7)-C(9)-H(9C)     | 109.5    |
| C(2)-C(3)-C(4)   | 106.8(4) | H(9A)-C(9)-H(9C)    | 109.5    |
| C(2)-C(3)-H(3)   | 126.6    | H(9B)-C(9)-H(9C)    | 109.5    |
| C(4)-C(3)-H(3)   | 126.6    | C(7)-C(10)-H(10A)   | 109.5    |
| C(5)-C(4)-C(3)   | 108.2(5) | C(7)-C(10)-H(10B)   | 109.5    |
| C(5)-C(4)-H(4)   | 125.9    | H(10A)-C(10)-H(10B) | 109.5    |
| C(3)-C(4)-H(4)   | 125.9    | C(7)-C(10)-H(10C)   | 109.5    |
| C(4)-C(5)-O(1)   | 108.1(4) | H(10A)-C(10)-H(10C) | 109.5    |
| C(4)-C(5)-C(6)   | 137.3(4) | H(10B)-C(10)-H(10C) | 109.5    |
| O(1)-C(5)-C(6)   | 114.6(4) | C(12)-C(11)-C(13)   | 109.5(5) |
| C(5)-C(6)-P(1)   | 110.9(3) | C(12)-C(11)-C(14)   | 108.1(5) |
| C(5)-C(6)-H(6A)  | 109.5    | C(13)-C(11)-C(14)   | 108.2(4) |
| P(1)-C(6)-H(6A)  | 109.5    | C(12)-C(11)-P(2)    | 108.8(3) |
| C(5)-C(6)-H(6B)  | 109.5    | C(13)-C(11)-P(2)    | 115.6(4) |
| P(1)-C(6)-H(6B)  | 109.5    | C(14)-C(11)-P(2)    | 106.4(4) |
| H(6A)-C(6)-H(6B) | 108.0    | C(11)-C(12)-H(12A)  | 109.5    |
| C(8)-C(7)-C(9)   | 111.1(4) | C(11)-C(12)-H(12B)  | 109.5    |
| C(8)-C(7)-C(10)  | 108.5(5) | H(12A)-C(12)-H(12B) | 109.5    |
| C(9)-C(7)-C(10)  | 108.2(4) | C(11)-C(12)-H(12C)  | 109.5    |
| C(8)-C(7)-P(2)   | 108.7(4) | H(12A)-C(12)-H(12C) | 109.5    |
| C(9)-C(7)-P(2)   | 115.7(4) | H(12B)-C(12)-H(12C) | 109.5    |
| C(10)-C(7)-P(2)  | 104.2(3) | C(11)-C(13)-H(13A)  | 109.5    |
| C(7)-C(8)-H(8A)  | 109.5    | C(11)-C(13)-H(13B)  | 109.5    |
| C(7)-C(8)-H(8B)  | 109.5    | H(13A)-C(13)-H(13B) | 109.5    |
| H(8A)-C(8)-H(8B) | 109.5    | C(11)-C(13)-H(13C)  | 109.5    |

|                     |          |                     |            |
|---------------------|----------|---------------------|------------|
| H(13A)-C(13)-H(13C) | 109.5    | H(18B)-C(18)-H(18C) | 109.5      |
| H(13B)-C(13)-H(13C) | 109.5    | C(21)-C(19)-C(20)   | 109.6(5)   |
| C(11)-C(14)-H(14A)  | 109.5    | C(21)-C(19)-C(22)   | 108.6(4)   |
| C(11)-C(14)-H(14B)  | 109.5    | C(20)-C(19)-C(22)   | 107.7(4)   |
| H(14A)-C(14)-H(14B) | 109.5    | C(21)-C(19)-P(1)    | 115.6(4)   |
| C(11)-C(14)-H(14C)  | 109.5    | C(20)-C(19)-P(1)    | 108.5(3)   |
| H(14A)-C(14)-H(14C) | 109.5    | C(22)-C(19)-P(1)    | 106.6(4)   |
| H(14B)-C(14)-H(14C) | 109.5    | C(19)-C(20)-H(20A)  | 109.5      |
| C(17)-C(15)-C(18)   | 109.0(4) | C(19)-C(20)-H(20B)  | 109.5      |
| C(17)-C(15)-C(16)   | 110.4(4) | H(20A)-C(20)-H(20B) | 109.5      |
| C(18)-C(15)-C(16)   | 108.0(4) | C(19)-C(20)-H(20C)  | 109.5      |
| C(17)-C(15)-P(1)    | 115.5(3) | H(20A)-C(20)-H(20C) | 109.5      |
| C(18)-C(15)-P(1)    | 104.6(3) | H(20B)-C(20)-H(20C) | 109.5      |
| C(16)-C(15)-P(1)    | 108.9(4) | C(19)-C(21)-H(21A)  | 109.5      |
| C(15)-C(16)-H(16A)  | 109.5    | C(19)-C(21)-H(21B)  | 109.5      |
| C(15)-C(16)-H(16B)  | 109.5    | H(21A)-C(21)-H(21B) | 109.5      |
| H(16A)-C(16)-H(16B) | 109.5    | C(19)-C(21)-H(21C)  | 109.5      |
| C(15)-C(16)-H(16C)  | 109.5    | H(21A)-C(21)-H(21C) | 109.5      |
| H(16A)-C(16)-H(16C) | 109.5    | H(21B)-C(21)-H(21C) | 109.5      |
| H(16B)-C(16)-H(16C) | 109.5    | C(19)-C(22)-H(22A)  | 109.5      |
| C(15)-C(17)-H(17A)  | 109.5    | C(19)-C(22)-H(22B)  | 109.5      |
| C(15)-C(17)-H(17B)  | 109.5    | H(22A)-C(22)-H(22B) | 109.5      |
| H(17A)-C(17)-H(17B) | 109.5    | C(19)-C(22)-H(22C)  | 109.5      |
| C(15)-C(17)-H(17C)  | 109.5    | H(22A)-C(22)-H(22C) | 109.5      |
| H(17A)-C(17)-H(17C) | 109.5    | H(22B)-C(22)-H(22C) | 109.5      |
| H(17B)-C(17)-H(17C) | 109.5    | O(2)-Rh(2)-P(3)     | 82.02(11)  |
| C(15)-C(18)-H(18A)  | 109.5    | O(2)-Rh(2)-P(4)     | 82.38(11)  |
| C(15)-C(18)-H(18B)  | 109.5    | P(3)-Rh(2)-P(4)     | 162.54(5)  |
| H(18A)-C(18)-H(18B) | 109.5    | O(2)-Rh(2)-Cl(2A)   | 175.29(12) |
| C(15)-C(18)-H(18C)  | 109.5    | P(3)-Rh(2)-Cl(2A)   | 99.13(4)   |
| H(18A)-C(18)-H(18C) | 109.5    | P(4)-Rh(2)-Cl(2A)   | 97.06(4)   |

|                     |            |                     |          |
|---------------------|------------|---------------------|----------|
| O(2)-Rh(2)-H(201)   | 104.2(7)   | C(25)-C(24)-C(23)   | 138.7(5) |
| P(3)-Rh(2)-H(201)   | 90.5(8)    | O(2)-C(24)-C(23)    | 113.8(4) |
| P(4)-Rh(2)-H(201)   | 85.8(7)    | C(24)-C(25)-C(26)   | 109.3(5) |
| Cl(2A)-Rh(2)-H(201) | 80.4(7)    | C(24)-C(25)-H(25)   | 125.4    |
| O(2)-Rh(2)-H(202)   | 92.6(10)   | C(26)-C(25)-H(25)   | 125.4    |
| P(3)-Rh(2)-H(202)   | 96.7(8)    | C(27)-C(26)-C(25)   | 106.9(5) |
| P(4)-Rh(2)-H(202)   | 91.8(9)    | C(27)-C(26)-H(26)   | 126.6    |
| Cl(2A)-Rh(2)-H(202) | 82.7(10)   | C(25)-C(26)-H(26)   | 126.6    |
| H(201)-Rh(2)-H(202) | 162.5(12)  | C(26)-C(27)-O(2)    | 108.0(5) |
| C(28)-P(3)-C(37)    | 104.0(3)   | C(26)-C(27)-C(28)   | 137.4(5) |
| C(28)-P(3)-C(41)    | 101.0(2)   | O(2)-C(27)-C(28)    | 114.3(5) |
| C(37)-P(3)-C(41)    | 112.5(2)   | C(27)-C(28)-P(3)    | 112.6(4) |
| C(28)-P(3)-Rh(2)    | 102.85(19) | C(27)-C(28)-H(28A)  | 109.1    |
| C(37)-P(3)-Rh(2)    | 115.92(18) | P(3)-C(28)-H(28A)   | 109.1    |
| C(41)-P(3)-Rh(2)    | 117.75(17) | C(27)-C(28)-H(28B)  | 109.1    |
| C(23)-P(4)-C(33)    | 103.9(3)   | P(3)-C(28)-H(28B)   | 109.1    |
| C(23)-P(4)-C(29)    | 101.8(2)   | H(28A)-C(28)-H(28B) | 107.8    |
| C(33)-P(4)-C(29)    | 112.6(2)   | C(31)-C(29)-C(30)   | 109.8(4) |
| C(23)-P(4)-Rh(2)    | 101.37(17) | C(31)-C(29)-C(32)   | 108.7(4) |
| C(33)-P(4)-Rh(2)    | 113.12(17) | C(30)-C(29)-C(32)   | 107.7(5) |
| C(29)-P(4)-Rh(2)    | 121.00(16) | C(31)-C(29)-P(4)    | 116.0(4) |
| C(24)-O(2)-C(27)    | 108.4(4)   | C(30)-C(29)-P(4)    | 109.0(3) |
| C(24)-O(2)-Rh(2)    | 124.4(3)   | C(32)-C(29)-P(4)    | 105.3(3) |
| C(27)-O(2)-Rh(2)    | 124.7(3)   | C(29)-C(30)-H(30A)  | 109.5    |
| C(24)-C(23)-P(4)    | 112.0(4)   | C(29)-C(30)-H(30B)  | 109.5    |
| C(24)-C(23)-H(23A)  | 109.2      | H(30A)-C(30)-H(30B) | 109.5    |
| P(4)-C(23)-H(23A)   | 109.2      | C(29)-C(30)-H(30C)  | 109.5    |
| C(24)-C(23)-H(23B)  | 109.2      | H(30A)-C(30)-H(30C) | 109.5    |
| P(4)-C(23)-H(23B)   | 109.2      | H(30B)-C(30)-H(30C) | 109.5    |
| H(23A)-C(23)-H(23B) | 107.9      | C(29)-C(31)-H(31A)  | 109.5    |
| C(25)-C(24)-O(2)    | 107.4(5)   | C(29)-C(31)-H(31B)  | 109.5    |

|                     |          |                     |          |
|---------------------|----------|---------------------|----------|
| H(31A)-C(31)-H(31B) | 109.5    | C(33)-C(36)-H(36C)  | 109.5    |
| C(29)-C(31)-H(31C)  | 109.5    | H(36A)-C(36)-H(36C) | 109.5    |
| H(31A)-C(31)-H(31C) | 109.5    | H(36B)-C(36)-H(36C) | 109.5    |
| H(31B)-C(31)-H(31C) | 109.5    | C(38)-C(37)-C(39)   | 109.8(5) |
| C(29)-C(32)-H(32A)  | 109.5    | C(38)-C(37)-C(40)   | 107.8(5) |
| C(29)-C(32)-H(32B)  | 109.5    | C(39)-C(37)-C(40)   | 108.8(5) |
| H(32A)-C(32)-H(32B) | 109.5    | C(38)-C(37)-P(3)    | 109.9(4) |
| C(29)-C(32)-H(32C)  | 109.5    | C(39)-C(37)-P(3)    | 115.7(4) |
| H(32A)-C(32)-H(32C) | 109.5    | C(40)-C(37)-P(3)    | 104.5(4) |
| H(32B)-C(32)-H(32C) | 109.5    | C(37)-C(38)-H(38A)  | 109.5    |
| C(36)-C(33)-C(34)   | 107.5(4) | C(37)-C(38)-H(38B)  | 109.5    |
| C(36)-C(33)-C(35)   | 108.8(4) | H(38A)-C(38)-H(38B) | 109.5    |
| C(34)-C(33)-C(35)   | 109.2(4) | C(37)-C(38)-H(38C)  | 109.5    |
| C(36)-C(33)-P(4)    | 106.7(3) | H(38A)-C(38)-H(38C) | 109.5    |
| C(34)-C(33)-P(4)    | 108.7(3) | H(38B)-C(38)-H(38C) | 109.5    |
| C(35)-C(33)-P(4)    | 115.7(4) | C(37)-C(39)-H(39A)  | 109.5    |
| C(33)-C(34)-H(34A)  | 109.5    | C(37)-C(39)-H(39B)  | 109.5    |
| C(33)-C(34)-H(34B)  | 109.5    | H(39A)-C(39)-H(39B) | 109.5    |
| H(34A)-C(34)-H(34B) | 109.5    | C(37)-C(39)-H(39C)  | 109.5    |
| C(33)-C(34)-H(34C)  | 109.5    | H(39A)-C(39)-H(39C) | 109.5    |
| H(34A)-C(34)-H(34C) | 109.5    | H(39B)-C(39)-H(39C) | 109.5    |
| H(34B)-C(34)-H(34C) | 109.5    | C(37)-C(40)-H(40A)  | 109.5    |
| C(33)-C(35)-H(35A)  | 109.5    | C(37)-C(40)-H(40B)  | 109.5    |
| C(33)-C(35)-H(35B)  | 109.5    | H(40A)-C(40)-H(40B) | 109.5    |
| H(35A)-C(35)-H(35B) | 109.5    | C(37)-C(40)-H(40C)  | 109.5    |
| C(33)-C(35)-H(35C)  | 109.5    | H(40A)-C(40)-H(40C) | 109.5    |
| H(35A)-C(35)-H(35C) | 109.5    | H(40B)-C(40)-H(40C) | 109.5    |
| H(35B)-C(35)-H(35C) | 109.5    | C(42)-C(41)-C(43)   | 111.1(5) |
| C(33)-C(36)-H(36A)  | 109.5    | C(42)-C(41)-C(44)   | 107.7(5) |
| C(33)-C(36)-H(36B)  | 109.5    | C(43)-C(41)-C(44)   | 108.4(5) |
| H(36A)-C(36)-H(36B) | 109.5    | C(42)-C(41)-P(3)    | 108.3(3) |



|                     |          |                     |       |
|---------------------|----------|---------------------|-------|
| C(43)-C(41)-P(3)    | 116.1(4) | H(43A)-C(43)-H(43B) | 109.5 |
| C(44)-C(41)-P(3)    | 104.7(4) | C(41)-C(43)-H(43C)  | 109.5 |
| C(41)-C(42)-H(42A)  | 109.5    | H(43A)-C(43)-H(43C) | 109.5 |
| C(41)-C(42)-H(42B)  | 109.5    | H(43B)-C(43)-H(43C) | 109.5 |
| H(42A)-C(42)-H(42B) | 109.5    | C(41)-C(44)-H(44A)  | 109.5 |
| C(41)-C(42)-H(42C)  | 109.5    | C(41)-C(44)-H(44B)  | 109.5 |
| H(42A)-C(42)-H(42C) | 109.5    | H(44A)-C(44)-H(44B) | 109.5 |
| H(42B)-C(42)-H(42C) | 109.5    | C(41)-C(44)-H(44C)  | 109.5 |
| C(41)-C(43)-H(43A)  | 109.5    | H(44A)-C(44)-H(44C) | 109.5 |
| C(41)-C(43)-H(43B)  | 109.5    | H(44B)-C(44)-H(44C) | 109.5 |

---

Table C5. Anisotropic displacement parameters ( $\text{\AA}^2 \times 10^3$ ) for (**<sup>t</sup>Bu<sub>2</sub>furPOP**)RhCl. The anisotropic

displacement factor exponent takes the form:  $-2\pi^2 [ h^2 a^{*2} U^{11} + \dots + 2 h k a^* b^* U^{12} ]$

|        | U <sup>11</sup> | U <sup>22</sup> | U <sup>33</sup> | U <sup>23</sup> | U <sup>13</sup> | U <sup>12</sup> |
|--------|-----------------|-----------------|-----------------|-----------------|-----------------|-----------------|
| Rh(1)  | 14(1)           | 14(1)           | 14(1)           | 0(1)            | 5(1)            | 0(1)            |
| Cl(1A) | 19(1)           | 26(1)           | 27(1)           | -3(1)           | 1(1)            | 3(1)            |
| Br(1B) | 19(1)           | 26(1)           | 27(1)           | -3(1)           | 1(1)            | 3(1)            |
| P(1)   | 16(1)           | 16(1)           | 18(1)           | -2(1)           | 8(1)            | -2(1)           |
| P(2)   | 19(1)           | 13(1)           | 17(1)           | -1(1)           | 5(1)            | 0(1)            |
| O(1)   | 11(1)           | 21(2)           | 20(2)           | 0(1)            | 3(1)            | 0(1)            |
| C(1)   | 23(2)           | 13(2)           | 21(2)           | 0(2)            | 7(2)            | 3(2)            |
| C(2)   | 19(2)           | 13(2)           | 20(2)           | 3(2)            | 8(2)            | 3(2)            |
| C(3)   | 19(2)           | 16(2)           | 24(2)           | 4(2)            | 7(2)            | 1(2)            |
| C(4)   | 21(2)           | 24(2)           | 20(2)           | 2(2)            | 6(2)            | 0(2)            |
| C(5)   | 18(2)           | 22(2)           | 12(2)           | -2(2)           | 5(2)            | -3(2)           |
| C(6)   | 15(2)           | 21(2)           | 13(2)           | 0(2)            | 5(2)            | -1(2)           |
| C(7)   | 21(2)           | 16(2)           | 23(3)           | -6(2)           | 6(2)            | -7(2)           |
| C(8)   | 24(2)           | 22(2)           | 34(3)           | 0(2)            | 0(2)            | -3(2)           |
| C(9)   | 30(3)           | 17(2)           | 29(3)           | -3(2)           | 6(2)            | -6(2)           |
| C(10)  | 38(3)           | 30(3)           | 37(3)           | -7(2)           | 24(3)           | -12(2)          |
| C(11)  | 26(3)           | 24(2)           | 26(3)           | -2(2)           | 16(2)           | 1(2)            |
| C(12)  | 52(4)           | 33(3)           | 25(3)           | 9(2)            | 21(3)           | 9(3)            |
| C(13)  | 31(3)           | 33(3)           | 29(3)           | -7(2)           | 16(3)           | 0(2)            |
| C(14)  | 33(3)           | 35(3)           | 37(3)           | -3(2)           | 22(3)           | -2(2)           |
| C(15)  | 23(2)           | 15(2)           | 28(3)           | -2(2)           | 14(2)           | -1(2)           |
| C(16)  | 34(3)           | 22(2)           | 45(4)           | -2(2)           | 19(3)           | 4(2)            |
| C(17)  | 33(3)           | 26(3)           | 28(3)           | -7(2)           | 18(2)           | 0(2)            |
| C(18)  | 28(3)           | 27(2)           | 34(3)           | -2(2)           | 19(2)           | -1(2)           |
| C(19)  | 20(2)           | 27(2)           | 22(2)           | 2(2)            | 10(2)           | -3(2)           |

|        |       |       |       |        |       |        |
|--------|-------|-------|-------|--------|-------|--------|
| C(20)  | 36(3) | 27(3) | 25(3) | 3(2)   | 15(2) | -1(2)  |
| C(21)  | 33(3) | 22(2) | 43(4) | -5(2)  | 21(3) | -12(2) |
| C(22)  | 26(3) | 36(3) | 36(3) | 4(2)   | 19(2) | -2(2)  |
| Rh(2)  | 17(1) | 15(1) | 14(1) | 2(1)   | 4(1)  | -1(1)  |
| Cl(2A) | 25(1) | 18(1) | 24(1) | 3(1)   | -1(1) | 2(1)   |
| Br(2B) | 25(1) | 18(1) | 24(1) | 3(1)   | -1(1) | 2(1)   |
| P(3)   | 25(1) | 18(1) | 18(1) | 2(1)   | 6(1)  | -3(1)  |
| P(4)   | 15(1) | 15(1) | 20(1) | 3(1)   | 7(1)  | 2(1)   |
| O(2)   | 28(2) | 21(2) | 25(2) | 8(2)   | 3(2)  | -1(2)  |
| C(23)  | 25(3) | 20(2) | 27(3) | 7(2)   | 6(2)  | 5(2)   |
| C(24)  | 25(3) | 22(2) | 30(3) | 8(2)   | 13(2) | 3(2)   |
| C(25)  | 26(3) | 33(3) | 33(3) | 13(2)  | 3(2)  | 1(2)   |
| C(26)  | 31(3) | 39(3) | 20(3) | 10(2)  | 4(2)  | 2(2)   |
| C(27)  | 24(2) | 30(2) | 19(2) | -1(2)  | 2(2)  | -7(2)  |
| C(28)  | 39(3) | 32(3) | 22(3) | 1(2)   | 3(3)  | -9(2)  |
| C(29)  | 21(2) | 22(2) | 27(3) | -3(2)  | 13(2) | 2(2)   |
| C(30)  | 35(3) | 28(2) | 23(2) | -4(2)  | 12(2) | 1(2)   |
| C(31)  | 28(3) | 23(2) | 40(3) | -8(2)  | 15(3) | 2(2)   |
| C(32)  | 37(3) | 35(3) | 38(3) | -4(2)  | 25(3) | -1(2)  |
| C(33)  | 21(2) | 26(3) | 21(2) | -2(2)  | 10(2) | -7(2)  |
| C(34)  | 18(2) | 22(2) | 37(3) | 3(2)   | 12(2) | 2(2)   |
| C(35)  | 30(3) | 22(2) | 36(3) | 5(2)   | 17(2) | -2(2)  |
| C(36)  | 34(3) | 38(3) | 27(3) | -3(2)  | 17(2) | -13(3) |
| C(37)  | 43(3) | 28(3) | 32(3) | -9(2)  | 26(3) | -7(2)  |
| C(38)  | 28(3) | 53(4) | 52(4) | -8(4)  | 22(3) | 5(3)   |
| C(39)  | 60(4) | 29(3) | 29(3) | -3(2)  | 24(3) | -7(3)  |
| C(40)  | 74(5) | 32(3) | 62(5) | -11(3) | 53(4) | -18(3) |
| C(41)  | 23(2) | 21(2) | 25(2) | -2(2)  | 9(2)  | -5(2)  |
| C(42)  | 36(3) | 27(3) | 30(3) | 6(2)   | 16(3) | -3(2)  |
| C(43)  | 46(4) | 37(3) | 39(4) | -2(3)  | 14(3) | -19(3) |
| C(44)  | 29(3) | 32(3) | 48(4) | 6(3)   | 16(3) | -3(2)  |

---

Table C6. Hydrogen coordinates ( $\times 10^4$ ) and isotropic displacement parameters ( $\text{\AA}^2 \times 10^{-3}$ )

for (**<sup>t</sup>Bu<sub>4</sub>furPOP**)RhCl.

|        | x        | y        | z        | U(eq) |
|--------|----------|----------|----------|-------|
| H(101) | 4523(17) | -338(15) | 2800(17) | 22    |
| H(102) | 5754(17) | 500(20)  | 1792(18) | 22    |
| H(1A)  | 3654     | 3151     | 2177     | 24    |
| H(1B)  | 4365     | 3258     | 1667     | 24    |
| H(3)   | 2021     | 2526     | 392      | 24    |
| H(4)   | 1770     | 628      | -535     | 27    |
| H(6A)  | 3825     | -815     | -245     | 20    |
| H(6B)  | 2993     | -1466    | -51      | 20    |
| H(8A)  | 7511     | 2872     | 4295     | 46    |
| H(8B)  | 6990     | 1627     | 4131     | 46    |
| H(8C)  | 6720     | 2615     | 4692     | 46    |
| H(9A)  | 5776     | 4301     | 3921     | 42    |
| H(9B)  | 5266     | 4400     | 2809     | 42    |
| H(9C)  | 6409     | 4665     | 3372     | 42    |
| H(10A) | 7016     | 3290     | 2633     | 48    |
| H(10B) | 5919     | 3019     | 1896     | 48    |
| H(10C) | 6629     | 1977     | 2452     | 48    |
| H(12A) | 5807     | 1194     | 4898     | 53    |
| H(12B) | 5146     | 165      | 4260     | 53    |
| H(12C) | 4843     | 792      | 4998     | 53    |
| H(13A) | 4131     | 2847     | 4658     | 45    |
| H(13B) | 4201     | 3543     | 3815     | 45    |
| H(13C) | 5177     | 3184     | 4702     | 45    |
| H(14A) | 3483     | 590      | 3018     | 49    |
| H(14B) | 3078     | 1896     | 2856     | 49    |

|        |          |          |          |    |
|--------|----------|----------|----------|----|
| H(14C) | 3214     | 1210     | 3781     | 49 |
| H(16A) | 5660     | -3741    | 1844     | 49 |
| H(16B) | 6342     | -2619    | 2227     | 49 |
| H(16C) | 6485     | -3463    | 1492     | 49 |
| H(17A) | 4156     | -2714    | -430     | 41 |
| H(17B) | 4430     | -3832    | 235      | 41 |
| H(17C) | 5131     | -3432    | -235     | 41 |
| H(18A) | 6318     | -1867    | 436      | 42 |
| H(18B) | 6176     | -949     | 1126     | 42 |
| H(18C) | 5384     | -1029    | 65       | 42 |
| H(20A) | 4094     | -3313    | 3028     | 43 |
| H(20B) | 4580     | -2050    | 3163     | 43 |
| H(20C) | 5053     | -3123    | 2858     | 43 |
| H(21A) | 3017     | -4025    | 1467     | 47 |
| H(21B) | 3986     | -4101    | 1298     | 47 |
| H(21C) | 3043     | -3434    | 565      | 47 |
| H(22A) | 2431     | -1689    | 1063     | 46 |
| H(22B) | 3119     | -1014    | 1995     | 46 |
| H(22C) | 2589     | -2195    | 2056     | 46 |
| H(201) | -725(15) | 2426(16) | 2644(13) | 25 |
| H(202) | 852(17)  | 2490(20) | 1953(16) | 25 |
| H(23A) | 748      | -918     | 3223     | 31 |
| H(23B) | 1425     | -365     | 2780     | 31 |
| H(25)  | 2205     | -217     | 5096     | 41 |
| H(26)  | 2612     | 1813     | 5807     | 39 |
| H(28A) | 2329     | 3956     | 4363     | 41 |
| H(28B) | 1637     | 4040     | 4893     | 41 |
| H(30A) | -1054    | -65      | -384     | 43 |
| H(30B) | -1258    | 961      | 192      | 43 |
| H(30C) | -1616    | -334     | 250      | 43 |
| H(31A) | -413     | -1862    | 1125     | 46 |
| H(31B) | 732      | -1574    | 1590     | 46 |

|        |       |       |      |    |
|--------|-------|-------|------|----|
| H(31C) | 148   | -1645 | 481  | 46 |
| H(32A) | 1305  | 448   | 1409 | 50 |
| H(32B) | 510   | 1395  | 809  | 50 |
| H(32C) | 714   | 286   | 307  | 50 |
| H(34A) | -2638 | 468   | 1905 | 38 |
| H(34B) | -2331 | 418   | 1058 | 38 |
| H(34C) | -1976 | 1478  | 1780 | 38 |
| H(35A) | -793  | -1800 | 2492 | 42 |
| H(35B) | -1661 | -1530 | 1493 | 42 |
| H(35C) | -1879 | -1592 | 2394 | 42 |
| H(36A) | -750  | 1049  | 3463 | 47 |
| H(36B) | -419  | -271  | 3744 | 47 |
| H(36C) | -1532 | 100   | 3448 | 47 |
| H(38A) | -1653 | 5364  | 3020 | 64 |
| H(38B) | -1397 | 4421  | 2416 | 64 |
| H(38C) | -1050 | 5741  | 2446 | 64 |
| H(39A) | 217   | 6563  | 3883 | 57 |
| H(39B) | 809   | 5753  | 4765 | 57 |
| H(39C) | -292  | 6123  | 4526 | 57 |
| H(40A) | -913  | 4152  | 4426 | 72 |
| H(40B) | 177   | 3669  | 4765 | 72 |
| H(40C) | -679  | 3176  | 3831 | 72 |
| H(42A) | 130   | 6350  | 2137 | 45 |
| H(42B) | 92    | 5221  | 1533 | 45 |
| H(42C) | 839   | 6252  | 1627 | 45 |
| H(43A) | 2300  | 6580  | 3248 | 63 |
| H(43B) | 2376  | 5747  | 4084 | 63 |
| H(43C) | 1507  | 6674  | 3663 | 63 |
| H(44A) | 2372  | 5018  | 2328 | 54 |
| H(44B) | 1551  | 4028  | 1954 | 54 |
| H(44C) | 2370  | 3987  | 3005 | 54 |

---

Table C7. Torsion angles [°] for (<sup>t</sup>Bu<sub>2</sub>furPOP)RhCl

|                         |             |                       |           |
|-------------------------|-------------|-----------------------|-----------|
| O(1)-Rh(1)-P(1)-C(6)    | 9.20(17)    | Rh(1)-O(1)-C(2)-C(3)  | -157.7(3) |
| P(2)-Rh(1)-P(1)-C(6)    | 46.7(2)     | C(5)-O(1)-C(2)-C(1)   | -177.7(4) |
| Cl(1A)-Rh(1)-P(1)-C(6)  | -166.83(14) | Rh(1)-O(1)-C(2)-C(1)  | 25.2(5)   |
| O(1)-Rh(1)-P(1)-C(19)   | -101.4(2)   | P(2)-C(1)-C(2)-C(3)   | 156.1(5)  |
| P(2)-Rh(1)-P(1)-C(19)   | -64.0(2)    | P(2)-C(1)-C(2)-O(1)   | -28.0(5)  |
| Cl(1A)-Rh(1)-P(1)-C(19) | 82.55(18)   | O(1)-C(2)-C(3)-C(4)   | 0.3(5)    |
| O(1)-Rh(1)-P(1)-C(15)   | 121.5(2)    | C(1)-C(2)-C(3)-C(4)   | 176.3(5)  |
| P(2)-Rh(1)-P(1)-C(15)   | 158.9(2)    | C(2)-C(3)-C(4)-C(5)   | 0.2(5)    |
| Cl(1A)-Rh(1)-P(1)-C(15) | -54.6(2)    | C(3)-C(4)-C(5)-O(1)   | -0.6(5)   |
| O(1)-Rh(1)-P(2)-C(1)    | -5.97(19)   | C(3)-C(4)-C(5)-C(6)   | 179.5(5)  |
| P(1)-Rh(1)-P(2)-C(1)    | -43.4(2)    | C(2)-O(1)-C(5)-C(4)   | 0.7(5)    |
| Cl(1A)-Rh(1)-P(2)-C(1)  | 170.15(17)  | Rh(1)-O(1)-C(5)-C(4)  | 158.0(3)  |
| O(1)-Rh(1)-P(2)-C(11)   | 105.2(2)    | C(2)-O(1)-C(5)-C(6)   | -179.3(4) |
| P(1)-Rh(1)-P(2)-C(11)   | 67.7(2)     | Rh(1)-O(1)-C(5)-C(6)  | -22.0(5)  |
| Cl(1A)-Rh(1)-P(2)-C(11) | -78.7(2)    | C(4)-C(5)-C(6)-P(1)   | -151.6(5) |
| O(1)-Rh(1)-P(2)-C(7)    | -117.5(2)   | O(1)-C(5)-C(6)-P(1)   | 28.4(5)   |
| P(1)-Rh(1)-P(2)-C(7)    | -154.9(2)   | C(19)-P(1)-C(6)-C(5)  | 94.4(3)   |
| Cl(1A)-Rh(1)-P(2)-C(7)  | 58.7(2)     | C(15)-P(1)-C(6)-C(5)  | -150.8(3) |
| P(2)-Rh(1)-O(1)-C(2)    | -9.4(3)     | Rh(1)-P(1)-C(6)-C(5)  | -22.4(3)  |
| P(1)-Rh(1)-O(1)-C(2)    | 158.7(3)    | C(1)-P(2)-C(7)-C(8)   | 169.9(4)  |
| Cl(1A)-Rh(1)-O(1)-C(2)  | -111.9(14)  | C(11)-P(2)-C(7)-C(8)  | 60.3(4)   |
| P(2)-Rh(1)-O(1)-C(5)    | -162.9(3)   | Rh(1)-P(2)-C(7)-C(8)  | -78.4(4)  |
| P(1)-Rh(1)-O(1)-C(5)    | 5.2(3)      | C(1)-P(2)-C(7)-C(9)   | 44.2(4)   |
| Cl(1A)-Rh(1)-O(1)-C(5)  | 94.5(15)    | C(11)-P(2)-C(7)-C(9)  | -65.5(5)  |
| C(11)-P(2)-C(1)-C(2)    | -99.9(4)    | Rh(1)-P(2)-C(7)-C(9)  | 155.8(3)  |
| C(7)-P(2)-C(1)-C(2)     | 144.6(3)    | C(1)-P(2)-C(7)-C(10)  | -74.5(4)  |
| Rh(1)-P(2)-C(1)-C(2)    | 19.5(4)     | C(11)-P(2)-C(7)-C(10) | 175.9(4)  |
| C(5)-O(1)-C(2)-C(3)     | -0.6(5)     | Rh(1)-P(2)-C(7)-C(10) | 37.2(4)   |

|                         |           |                         |            |
|-------------------------|-----------|-------------------------|------------|
| C(1)-P(2)-C(11)-C(12)   | 167.1(4)  | P(4)-Rh(2)-P(3)-C(37)   | -83.7(3)   |
| C(7)-P(2)-C(11)-C(12)   | -84.4(4)  | Cl(2A)-Rh(2)-P(3)-C(37) | 74.1(2)    |
| Rh(1)-P(2)-C(11)-C(12)  | 56.8(4)   | O(2)-Rh(2)-P(3)-C(41)   | 112.0(2)   |
| C(1)-P(2)-C(11)-C(13)   | -69.3(4)  | P(4)-Rh(2)-P(3)-C(41)   | 138.9(2)   |
| C(7)-P(2)-C(11)-C(13)   | 39.2(5)   | Cl(2A)-Rh(2)-P(3)-C(41) | -63.33(19) |
| Rh(1)-P(2)-C(11)-C(13)  | -179.6(3) | O(2)-Rh(2)-P(4)-C(23)   | -10.6(2)   |
| C(1)-P(2)-C(11)-C(14)   | 50.9(4)   | P(3)-Rh(2)-P(4)-C(23)   | -37.4(2)   |
| C(7)-P(2)-C(11)-C(14)   | 159.4(4)  | Cl(2A)-Rh(2)-P(4)-C(23) | 164.66(19) |
| Rh(1)-P(2)-C(11)-C(14)  | -59.4(4)  | O(2)-Rh(2)-P(4)-C(33)   | 100.0(2)   |
| C(6)-P(1)-C(15)-C(17)   | -46.1(4)  | P(3)-Rh(2)-P(4)-C(33)   | 73.2(2)    |
| C(19)-P(1)-C(15)-C(17)  | 63.5(4)   | Cl(2A)-Rh(2)-P(4)-C(33) | -84.75(18) |
| Rh(1)-P(1)-C(15)-C(17)  | -158.9(3) | O(2)-Rh(2)-P(4)-C(29)   | -121.9(2)  |
| C(6)-P(1)-C(15)-C(18)   | 73.8(4)   | P(3)-Rh(2)-P(4)-C(29)   | -148.7(2)  |
| C(19)-P(1)-C(15)-C(18)  | -176.7(3) | Cl(2A)-Rh(2)-P(4)-C(29) | 53.33(19)  |
| Rh(1)-P(1)-C(15)-C(18)  | -39.0(4)  | P(3)-Rh(2)-O(2)-C(24)   | 169.6(4)   |
| C(6)-P(1)-C(15)-C(16)   | -171.0(3) | P(4)-Rh(2)-O(2)-C(24)   | -2.6(4)    |
| C(19)-P(1)-C(15)-C(16)  | -61.4(4)  | Cl(2A)-Rh(2)-O(2)-C(24) | -86.0(14)  |
| Rh(1)-P(1)-C(15)-C(16)  | 76.2(4)   | P(3)-Rh(2)-O(2)-C(27)   | 9.6(4)     |
| C(6)-P(1)-C(19)-C(21)   | 72.0(4)   | P(4)-Rh(2)-O(2)-C(27)   | -162.5(4)  |
| C(15)-P(1)-C(19)-C(21)  | -35.7(5)  | Cl(2A)-Rh(2)-O(2)-C(27) | 114.1(13)  |
| Rh(1)-P(1)-C(19)-C(21)  | -178.5(4) | C(33)-P(4)-C(23)-C(24)  | -94.4(4)   |
| C(6)-P(1)-C(19)-C(20)   | -164.5(3) | C(29)-P(4)-C(23)-C(24)  | 148.5(4)   |
| C(15)-P(1)-C(19)-C(20)  | 87.8(4)   | Rh(2)-P(4)-C(23)-C(24)  | 23.2(4)    |
| Rh(1)-P(1)-C(19)-C(20)  | -55.0(4)  | C(27)-O(2)-C(24)-C(25)  | -0.8(6)    |
| C(6)-P(1)-C(19)-C(22)   | -48.8(4)  | Rh(2)-O(2)-C(24)-C(25)  | -163.5(4)  |
| C(15)-P(1)-C(19)-C(22)  | -156.5(4) | C(27)-O(2)-C(24)-C(23)  | -178.3(4)  |
| Rh(1)-P(1)-C(19)-C(22)  | 60.7(4)   | Rh(2)-O(2)-C(24)-C(23)  | 18.9(6)    |
| O(2)-Rh(2)-P(3)-C(28)   | 2.2(2)    | P(4)-C(23)-C(24)-C(25)  | 156.3(6)   |
| P(4)-Rh(2)-P(3)-C(28)   | 29.0(3)   | P(4)-C(23)-C(24)-O(2)   | -27.3(6)   |
| Cl(2A)-Rh(2)-P(3)-C(28) | -173.2(2) | O(2)-C(24)-C(25)-C(26)  | 0.3(6)     |
| O(2)-Rh(2)-P(3)-C(37)   | -110.5(2) | C(23)-C(24)-C(25)-C(26) | 176.8(6)   |



|                         |           |                        |           |
|-------------------------|-----------|------------------------|-----------|
| C(24)-C(25)-C(26)-C(27) | 0.4(7)    | C(41)-P(3)-C(37)-C(38) | 79.2(5)   |
| C(25)-C(26)-C(27)-O(2)  | -0.9(6)   | Rh(2)-P(3)-C(37)-C(38) | -60.4(5)  |
| C(25)-C(26)-C(27)-C(28) | -175.2(7) | C(28)-P(3)-C(37)-C(39) | 62.6(5)   |
| C(24)-O(2)-C(27)-C(26)  | 1.0(6)    | C(41)-P(3)-C(37)-C(39) | -45.8(5)  |
| Rh(2)-O(2)-C(27)-C(26)  | 163.7(4)  | Rh(2)-P(3)-C(37)-C(39) | 174.6(4)  |
| C(24)-O(2)-C(27)-C(28)  | 176.9(5)  | C(28)-P(3)-C(37)-C(40) | -57.0(5)  |
| Rh(2)-O(2)-C(27)-C(28)  | -20.5(6)  | C(41)-P(3)-C(37)-C(40) | -165.3(4) |
| C(26)-C(27)-C(28)-P(3)  | -165.7(6) | Rh(2)-P(3)-C(37)-C(40) | 55.1(5)   |
| O(2)-C(27)-C(28)-P(3)   | 20.1(6)   | C(28)-P(3)-C(41)-C(42) | -173.9(4) |
| C(37)-P(3)-C(28)-C(27)  | 108.9(5)  | C(37)-P(3)-C(41)-C(42) | -63.6(4)  |
| C(41)-P(3)-C(28)-C(27)  | -134.4(4) | Rh(2)-P(3)-C(41)-C(42) | 75.2(4)   |
| Rh(2)-P(3)-C(28)-C(27)  | -12.4(5)  | C(28)-P(3)-C(41)-C(43) | -48.1(5)  |
| C(23)-P(4)-C(29)-C(31)  | 42.6(4)   | C(37)-P(3)-C(41)-C(43) | 62.2(5)   |
| C(33)-P(4)-C(29)-C(31)  | -68.0(4)  | Rh(2)-P(3)-C(41)-C(43) | -159.0(4) |
| Rh(2)-P(4)-C(29)-C(31)  | 153.7(3)  | C(28)-P(3)-C(41)-C(44) | 71.4(4)   |
| C(23)-P(4)-C(29)-C(30)  | 167.1(4)  | C(37)-P(3)-C(41)-C(44) | -178.4(4) |
| C(33)-P(4)-C(29)-C(30)  | 56.5(4)   | Rh(2)-P(3)-C(41)-C(44) | -39.6(4)  |
| Rh(2)-P(4)-C(29)-C(30)  | -81.8(4)  |                        |           |
| C(23)-P(4)-C(29)-C(32)  | -77.6(4)  |                        |           |
| C(33)-P(4)-C(29)-C(32)  | 171.8(4)  |                        |           |
| Rh(2)-P(4)-C(29)-C(32)  | 33.5(4)   |                        |           |
| C(23)-P(4)-C(33)-C(36)  | 54.0(4)   |                        |           |
| C(29)-P(4)-C(33)-C(36)  | 163.3(4)  |                        |           |
| Rh(2)-P(4)-C(33)-C(36)  | -55.0(4)  |                        |           |
| C(23)-P(4)-C(33)-C(34)  | 169.7(4)  |                        |           |
| C(29)-P(4)-C(33)-C(34)  | -81.0(4)  |                        |           |
| Rh(2)-P(4)-C(33)-C(34)  | 60.6(4)   |                        |           |
| C(23)-P(4)-C(33)-C(35)  | -67.2(4)  |                        |           |
| C(29)-P(4)-C(33)-C(35)  | 42.1(5)   |                        |           |
| Rh(2)-P(4)-C(33)-C(35)  | -176.2(3) |                        |           |
| C(28)-P(3)-C(37)-C(38)  | -172.4(4) |                        |           |



Figure D1: ORTEP diagram of *cis*-(<sup>t</sup>Bu<sub>xan</sub>POP)Rh(H)<sub>2</sub>Cl

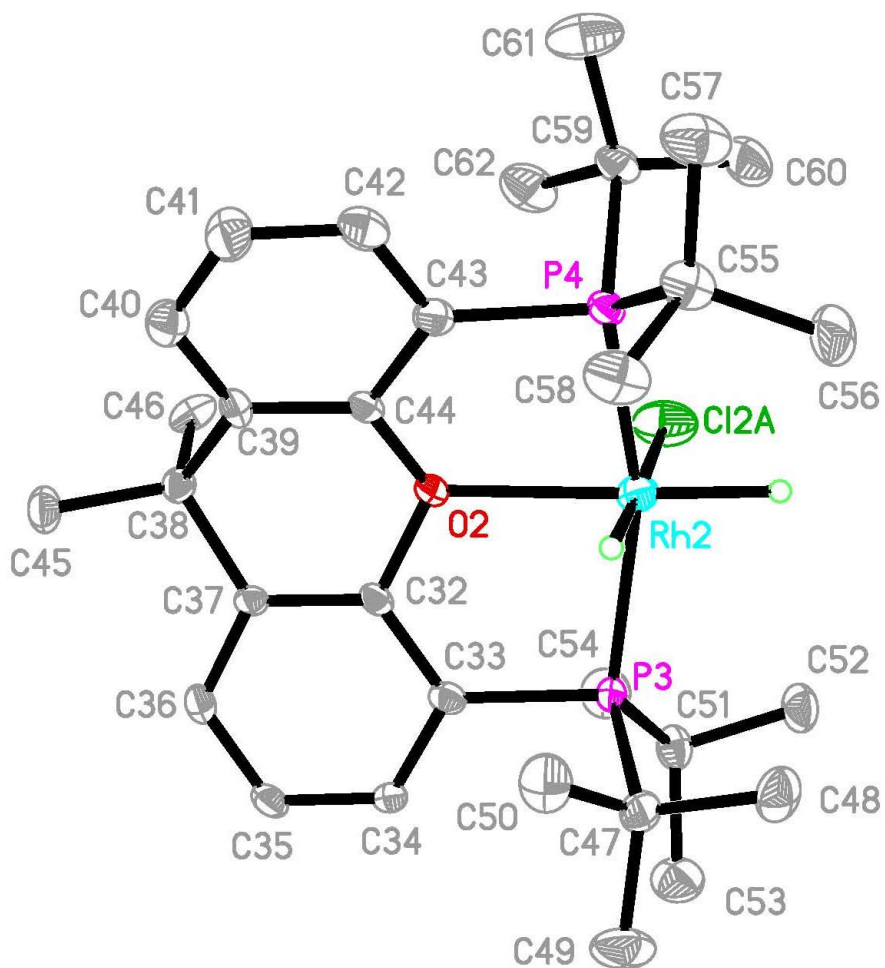

Table D2. Crystal data and structure refinement for *cis*-(<sup>t</sup>Bu<sub>3</sub>xanPOP)Rh(H)<sub>2</sub>Cl.

|                                   |                                             |                 |
|-----------------------------------|---------------------------------------------|-----------------|
| Identification code               | mh310_xtl2                                  |                 |
| Empirical formula                 | C31.05 H50.05 Cl1.05 O P2 Rh                |                 |
| Formula weight                    | 641.25                                      |                 |
| Temperature                       | 100(2) K                                    |                 |
| Wavelength                        | 0.71073 Å                                   |                 |
| Crystal system                    | Monoclinic                                  |                 |
| Space group                       | P2(1)/c                                     |                 |
| Unit cell dimensions              | a = 32.468(2) Å                             | α = 90°.        |
|                                   | b = 11.6622(9) Å                            | β = 97.443(1)°. |
|                                   | c = 16.7338(12) Å                           | γ = 90°.        |
| Volume                            | 6282.7(8) Å <sup>3</sup>                    |                 |
| Z                                 | 8                                           |                 |
| Density (calculated)              | 1.356 Mg/m <sup>3</sup>                     |                 |
| Absorption coefficient            | 0.756 mm <sup>-1</sup>                      |                 |
| F(000)                            | 2697                                        |                 |
| Crystal size                      | 0.49 x 0.06 x 0.05 mm <sup>3</sup>          |                 |
| Theta range for data collection   | 1.86 to 29.57°.                             |                 |
| Index ranges                      | -45<=h<=45, -16<=k<=16, -23<=l<=23          |                 |
| Reflections collected             | 68829                                       |                 |
| Independent reflections           | 17599 [R(int) = 0.0661]                     |                 |
| Completeness to theta = 29.57°    | 99.8 %                                      |                 |
| Absorption correction             | Semi-empirical from equivalents             |                 |
| Max. and min. transmission        | 0.9632 and 0.7082                           |                 |
| Refinement method                 | Full-matrix least-squares on F <sup>2</sup> |                 |
| Data / restraints / parameters    | 17599 / 1060 / 702                          |                 |
| Goodness-of-fit on F <sup>2</sup> | 1.012                                       |                 |
| Final R indices [I>2sigma(I)]     | R1 = 0.0820, wR2 = 0.1836                   |                 |
| R indices (all data)              | R1 = 0.1046, wR2 = 0.1955                   |                 |
| Largest diff. peak and hole       | 3.994 and -1.958 e.Å <sup>-3</sup>          |                 |

Table D3. Atomic coordinates ( $\times 10^4$ ) and equivalent isotropic displacement parameters ( $\text{\AA}^2 \times 10^3$ ) for *cis*-(<sup>t</sup>Bu<sub>2</sub>xanPOP)Rh(H)<sub>2</sub>Cl. U(eq) is defined as one third of the trace of the orthogonalized U<sup>ij</sup> tensor.

|       | x       | y       | z       | U(eq) |
|-------|---------|---------|---------|-------|
| Rh(1) | 1017(1) | 5250(1) | 4509(1) | 11(1) |
| P(1)  | 600(1)  | 6722(1) | 3982(1) | 11(1) |
| P(2)  | 1481(1) | 3760(1) | 4654(1) | 13(1) |
| Cl(1) | 1539(1) | 6615(1) | 5200(1) | 18(1) |
| O(1)  | 1363(1) | 5691(3) | 3465(2) | 11(1) |
| C(1)  | 1760(2) | 5196(4) | 3493(3) | 14(1) |
| C(2)  | 1866(2) | 4297(4) | 4031(3) | 16(1) |
| C(3)  | 2257(2) | 3798(5) | 4032(3) | 20(1) |
| C(4)  | 2528(2) | 4166(5) | 3516(3) | 25(1) |
| C(5)  | 2411(2) | 5041(5) | 2969(3) | 20(1) |
| C(6)  | 2025(1) | 5566(4) | 2940(3) | 13(1) |
| C(7)  | 1863(2) | 6436(4) | 2302(3) | 14(1) |
| C(8)  | 1559(2) | 7239(4) | 2635(3) | 13(1) |
| C(9)  | 1486(2) | 8358(4) | 2360(3) | 18(1) |
| C(10) | 1171(2) | 9021(5) | 2606(3) | 20(1) |
| C(11) | 909(2)  | 8556(4) | 3108(3) | 16(1) |
| C(12) | 968(1)  | 7435(4) | 3402(3) | 12(1) |
| C(13) | 1307(1) | 6815(4) | 3176(3) | 10(1) |
| C(14) | 2213(2) | 7094(5) | 1967(3) | 17(1) |
| C(15) | 1620(2) | 5747(4) | 1601(3) | 19(1) |
| C(16) | 1296(2) | 2413(4) | 4088(4) | 21(1) |
| C(17) | 941(2)  | 1889(5) | 4502(5) | 35(2) |
| C(18) | 1628(2) | 1508(5) | 3996(5) | 36(2) |
| C(19) | 1114(2) | 2779(5) | 3228(4) | 26(1) |
| C(20) | 1755(2) | 3408(4) | 5698(3) | 18(1) |
| C(21) | 1426(2) | 3542(6) | 6267(4) | 30(1) |
| C(22) | 1949(2) | 2214(5) | 5819(4) | 27(1) |
| C(23) | 2099(2) | 4287(5) | 5946(3) | 23(1) |

|        |          |          |          |       |
|--------|----------|----------|----------|-------|
| C(24)  | 180(2)   | 6313(4)  | 3136(3)  | 14(1) |
| C(25)  | -162(2)  | 5653(5)  | 3492(4)  | 27(1) |
| C(26)  | -8(2)    | 7305(5)  | 2610(3)  | 22(1) |
| C(27)  | 381(2)   | 5512(5)  | 2568(4)  | 26(1) |
| C(28)  | 390(2)   | 7777(4)  | 4693(3)  | 17(1) |
| C(29)  | 253(2)   | 7042(5)  | 5374(3)  | 26(1) |
| C(30)  | 18(2)    | 8509(5)  | 4347(3)  | 23(1) |
| C(31)  | 741(2)   | 8570(5)  | 5051(4)  | 27(1) |
| Rh(2)  | 3918(1)  | 4757(1)  | 1551(1)  | 20(1) |
| P(3)   | 3947(1)  | 6561(1)  | 2112(1)  | 15(1) |
| P(4)   | 3890(1)  | 3429(1)  | 525(1)   | 16(1) |
| Cl(2A) | 3496(1)  | 3810(2)  | 2518(1)  | 39(1) |
| Cl(2B) | 3496(1)  | 3810(2)  | 2518(1)  | 39(1) |
| C(63B) | 4090(20) | 3040(60) | 2830(40) | 30    |
| Cl(3B) | 4414(8)  | 4145(19) | 2161(11) | 71(7) |
| O(2)   | 3369(1)  | 5493(3)  | 744(2)   | 16(1) |
| C(32)  | 3264(2)  | 6635(4)  | 893(3)   | 14(1) |
| C(33)  | 3483(2)  | 7216(4)  | 1536(3)  | 16(1) |
| C(34)  | 3350(2)  | 8320(4)  | 1693(3)  | 17(1) |
| C(35)  | 3016(2)  | 8822(4)  | 1226(3)  | 19(1) |
| C(36)  | 2809(2)  | 8230(4)  | 576(3)   | 17(1) |
| C(37)  | 2924(2)  | 7124(4)  | 404(3)   | 14(1) |
| C(38)  | 2679(2)  | 6399(4)  | -257(3)  | 15(1) |
| C(39)  | 2981(2)  | 5579(4)  | -590(3)  | 15(1) |
| C(40)  | 2931(2)  | 5183(5)  | -1383(3) | 24(1) |
| C(41)  | 3180(2)  | 4317(6)  | -1621(3) | 28(1) |
| C(42)  | 3467(2)  | 3787(5)  | -1064(4) | 25(1) |
| C(43)  | 3535(2)  | 4158(4)  | -263(3)  | 18(1) |
| C(44)  | 3299(2)  | 5088(4)  | -52(3)   | 14(1) |
| C(45)  | 2440(2)  | 7133(5)  | -903(3)  | 23(1) |
| C(46)  | 2364(2)  | 5652(5)  | 128(3)   | 23(1) |
| C(47)  | 4389(2)  | 7476(5)  | 1825(3)  | 22(1) |

|       |         |         |         |       |
|-------|---------|---------|---------|-------|
| C(48) | 4795(2) | 6839(6) | 2097(4) | 29(1) |
| C(49) | 4427(2) | 8684(6) | 2163(5) | 39(2) |
| C(50) | 4329(2) | 7586(6) | 908(4)  | 32(1) |
| C(51) | 3881(2) | 6740(5) | 3219(3) | 23(1) |
| C(52) | 4174(2) | 5880(5) | 3686(3) | 27(1) |
| C(53) | 3989(2) | 7932(6) | 3626(4) | 35(1) |
| C(54) | 3432(2) | 6485(6) | 3311(4) | 33(1) |
| C(55) | 4384(2) | 3187(5) | 77(4)   | 25(1) |
| C(56) | 4740(2) | 3070(6) | 781(4)  | 35(2) |
| C(57) | 4404(2) | 2136(6) | -463(5) | 37(2) |
| C(58) | 4477(2) | 4262(6) | -407(4) | 31(1) |
| C(59) | 3604(2) | 2042(5) | 655(3)  | 20(1) |
| C(60) | 3832(2) | 1444(5) | 1403(4) | 35(2) |
| C(61) | 3544(3) | 1206(6) | -49(5)  | 44(2) |
| C(62) | 3166(2) | 2395(6) | 809(4)  | 34(1) |

---

Table D4. Bond lengths [Å] and angles [°] for *cis*-(<sup>t</sup>Bu<sub>xanPOP</sub>)Rh(H)<sub>2</sub>Cl.

|             |            |              |          |
|-------------|------------|--------------|----------|
| Rh(1)-O(1)  | 2.254(3)   | C(9)-H(9)    | 0.9500   |
| Rh(1)-P(2)  | 2.2919(13) | C(10)-C(11)  | 1.382(7) |
| Rh(1)-P(1)  | 2.2924(12) | C(10)-H(10)  | 0.9500   |
| Rh(1)-Cl(1) | 2.4958(13) | C(11)-C(12)  | 1.401(7) |
| Rh(1)-H(1)  | 1.595(10)  | C(11)-H(11)  | 0.9500   |
| Rh(1)-H(2)  | 1.597(10)  | C(12)-C(13)  | 1.409(6) |
| P(1)-C(12)  | 1.834(5)   | C(14)-H(14A) | 0.9800   |
| P(1)-C(24)  | 1.894(5)   | C(14)-H(14B) | 0.9800   |
| P(1)-C(28)  | 1.896(5)   | C(14)-H(14C) | 0.9800   |
| P(2)-C(2)   | 1.839(5)   | C(15)-H(15A) | 0.9800   |
| P(2)-C(16)  | 1.893(5)   | C(15)-H(15B) | 0.9800   |
| P(2)-C(20)  | 1.899(5)   | C(15)-H(15C) | 0.9800   |
| O(1)-C(13)  | 1.400(5)   | C(16)-C(18)  | 1.531(8) |
| O(1)-C(1)   | 1.408(5)   | C(16)-C(19)  | 1.543(8) |
| C(1)-C(2)   | 1.395(7)   | C(16)-C(17)  | 1.545(9) |
| C(1)-C(6)   | 1.411(7)   | C(17)-H(17A) | 0.9800   |
| C(2)-C(3)   | 1.396(7)   | C(17)-H(17B) | 0.9800   |
| C(3)-C(4)   | 1.378(8)   | C(17)-H(17C) | 0.9800   |
| C(3)-H(3)   | 0.9500     | C(18)-H(18A) | 0.9800   |
| C(4)-C(5)   | 1.389(8)   | C(18)-H(18B) | 0.9800   |
| C(4)-H(4)   | 0.9500     | C(18)-H(18C) | 0.9800   |
| C(5)-C(6)   | 1.392(7)   | C(19)-H(19A) | 0.9800   |
| C(5)-H(5)   | 0.9500     | C(19)-H(19B) | 0.9800   |
| C(6)-C(7)   | 1.516(7)   | C(19)-H(19C) | 0.9800   |
| C(7)-C(8)   | 1.518(7)   | C(20)-C(21)  | 1.527(8) |
| C(7)-C(14)  | 1.535(7)   | C(20)-C(22)  | 1.531(7) |
| C(7)-C(15)  | 1.551(7)   | C(20)-C(23)  | 1.533(8) |
| C(8)-C(13)  | 1.388(6)   | C(21)-H(21A) | 0.9800   |
| C(8)-C(9)   | 1.394(7)   | C(21)-H(21B) | 0.9800   |
| C(9)-C(10)  | 1.386(8)   | C(21)-H(21C) | 0.9800   |



|              |           |               |            |
|--------------|-----------|---------------|------------|
| C(22)-H(22A) | 0.9800    | Rh(2)-P(3)    | 2.3005(14) |
| C(22)-H(22B) | 0.9800    | Rh(2)-P(4)    | 2.3054(14) |
| C(22)-H(22C) | 0.9800    | Rh(2)-Cl(2A)  | 2.5081(17) |
| C(23)-H(23A) | 0.9800    | Rh(2)-H(4A)   | 1.582(10)  |
| C(23)-H(23B) | 0.9800    | Rh(2)-H(3A)   | 1.597(10)  |
| C(23)-H(23C) | 0.9800    | P(3)-C(33)    | 1.845(5)   |
| C(24)-C(26)  | 1.532(7)  | P(3)-C(47)    | 1.899(5)   |
| C(24)-C(25)  | 1.534(7)  | P(3)-C(51)    | 1.905(6)   |
| C(24)-C(27)  | 1.538(7)  | P(4)-C(43)    | 1.841(6)   |
| C(25)-H(25A) | 0.9800    | P(4)-C(55)    | 1.879(6)   |
| C(25)-H(25B) | 0.9800    | P(4)-C(59)    | 1.892(5)   |
| C(25)-H(25C) | 0.9800    | C(63B)-Cl(3B) | 2.09(7)    |
| C(26)-H(26A) | 0.9800    | C(63B)-H(63A) | 0.9900     |
| C(26)-H(26B) | 0.9800    | C(63B)-H(63B) | 0.9900     |
| C(26)-H(26C) | 0.9800    | Cl(3B)-H(3A)  | 0.64(8)    |
| C(27)-H(27A) | 0.9800    | O(2)-C(44)    | 1.403(6)   |
| C(27)-H(27B) | 0.9800    | O(2)-C(32)    | 1.405(6)   |
| C(27)-H(27C) | 0.9800    | C(32)-C(33)   | 1.387(7)   |
| C(28)-C(31)  | 1.527(8)  | C(32)-C(37)   | 1.407(7)   |
| C(28)-C(30)  | 1.530(7)  | C(33)-C(34)   | 1.395(7)   |
| C(28)-C(29)  | 1.539(7)  | C(34)-C(35)   | 1.381(7)   |
| C(29)-H(29A) | 0.9800    | C(34)-H(34)   | 0.9500     |
| C(29)-H(29B) | 0.9800    | C(35)-C(36)   | 1.387(7)   |
| C(29)-H(29C) | 0.9800    | C(35)-H(35)   | 0.9500     |
| C(30)-H(30A) | 0.9800    | C(36)-C(37)   | 1.383(7)   |
| C(30)-H(30B) | 0.9800    | C(36)-H(36)   | 0.9500     |
| C(30)-H(30C) | 0.9800    | C(37)-C(38)   | 1.530(7)   |
| C(31)-H(31A) | 0.9800    | C(38)-C(45)   | 1.511(7)   |
| C(31)-H(31B) | 0.9800    | C(38)-C(39)   | 1.525(7)   |
| C(31)-H(31C) | 0.9800    | C(38)-C(46)   | 1.546(7)   |
| Rh(2)-Cl(3B) | 1.928(19) | C(39)-C(40)   | 1.394(7)   |
| Rh(2)-O(2)   | 2.263(4)  | C(39)-C(44)   | 1.401(7)   |

|              |          |              |          |
|--------------|----------|--------------|----------|
| C(40)-C(41)  | 1.385(8) | C(53)-H(53A) | 0.9800   |
| C(40)-H(40)  | 0.9500   | C(53)-H(53B) | 0.9800   |
| C(41)-C(42)  | 1.376(8) | C(53)-H(53C) | 0.9800   |
| C(41)-H(41)  | 0.9500   | C(54)-H(54A) | 0.9800   |
| C(42)-C(43)  | 1.399(8) | C(54)-H(54B) | 0.9800   |
| C(42)-H(42)  | 0.9500   | C(54)-H(54C) | 0.9800   |
| C(43)-C(44)  | 1.400(7) | C(55)-C(57)  | 1.529(9) |
| C(45)-H(45A) | 0.9800   | C(55)-C(58)  | 1.543(8) |
| C(45)-H(45B) | 0.9800   | C(55)-C(56)  | 1.546(9) |
| C(45)-H(45C) | 0.9800   | C(56)-H(56A) | 0.9800   |
| C(46)-H(46A) | 0.9800   | C(56)-H(56B) | 0.9800   |
| C(46)-H(46B) | 0.9800   | C(56)-H(56C) | 0.9800   |
| C(46)-H(46C) | 0.9800   | C(57)-H(57A) | 0.9800   |
| C(47)-C(49)  | 1.517(9) | C(57)-H(57B) | 0.9800   |
| C(47)-C(50)  | 1.528(8) | C(57)-H(57C) | 0.9800   |
| C(47)-C(48)  | 1.530(8) | C(58)-H(58A) | 0.9800   |
| C(48)-H(48A) | 0.9800   | C(58)-H(58B) | 0.9800   |
| C(48)-H(48B) | 0.9800   | C(58)-H(58C) | 0.9800   |
| C(48)-H(48C) | 0.9800   | C(59)-C(61)  | 1.522(9) |
| C(49)-H(49A) | 0.9800   | C(59)-C(62)  | 1.532(8) |
| C(49)-H(49B) | 0.9800   | C(59)-C(60)  | 1.537(8) |
| C(49)-H(49C) | 0.9800   | C(60)-H(60A) | 0.9800   |
| C(50)-H(50A) | 0.9800   | C(60)-H(60B) | 0.9800   |
| C(50)-H(50B) | 0.9800   | C(60)-H(60C) | 0.9800   |
| C(50)-H(50C) | 0.9800   | C(61)-H(61A) | 0.9800   |
| C(51)-C(54)  | 1.513(8) | C(61)-H(61B) | 0.9800   |
| C(51)-C(52)  | 1.525(8) | C(61)-H(61C) | 0.9800   |
| C(51)-C(53)  | 1.567(9) | C(62)-H(62A) | 0.9800   |
| C(52)-H(52A) | 0.9800   | C(62)-H(62B) | 0.9800   |
| C(52)-H(52B) | 0.9800   | C(62)-H(62C) | 0.9800   |
| C(52)-H(52C) | 0.9800   |              |          |

|                  |            |                   |          |
|------------------|------------|-------------------|----------|
| O(1)-Rh(1)-P(2)  | 82.48(9)   | O(1)-C(1)-C(6)    | 119.0(4) |
| O(1)-Rh(1)-P(1)  | 81.95(9)   | C(1)-C(2)-C(3)    | 117.6(5) |
| P(2)-Rh(1)-P(1)  | 163.06(5)  | C(1)-C(2)-P(2)    | 119.4(4) |
| O(1)-Rh(1)-Cl(1) | 80.66(9)   | C(3)-C(2)-P(2)    | 122.8(4) |
| P(2)-Rh(1)-Cl(1) | 92.15(4)   | C(4)-C(3)-C(2)    | 121.5(5) |
| P(1)-Rh(1)-Cl(1) | 91.89(4)   | C(4)-C(3)-H(3)    | 119.3    |
| O(1)-Rh(1)-H(1)  | 174(2)     | C(2)-C(3)-H(3)    | 119.3    |
| P(2)-Rh(1)-H(1)  | 98(2)      | C(3)-C(4)-C(5)    | 120.0(5) |
| P(1)-Rh(1)-H(1)  | 99(2)      | C(3)-C(4)-H(4)    | 120.0    |
| Cl(1)-Rh(1)-H(1) | 93(2)      | C(5)-C(4)-H(4)    | 120.0    |
| O(1)-Rh(1)-H(2)  | 107(2)     | C(4)-C(5)-C(6)    | 120.9(5) |
| P(2)-Rh(1)-H(2)  | 91(2)      | C(4)-C(5)-H(5)    | 119.6    |
| P(1)-Rh(1)-H(2)  | 87(2)      | C(6)-C(5)-H(5)    | 119.6    |
| Cl(1)-Rh(1)-H(2) | 172(2)     | C(5)-C(6)-C(1)    | 117.8(4) |
| H(1)-Rh(1)-H(2)  | 80(3)      | C(5)-C(6)-C(7)    | 123.2(4) |
| C(12)-P(1)-C(24) | 100.0(2)   | C(1)-C(6)-C(7)    | 118.8(4) |
| C(12)-P(1)-C(28) | 110.4(2)   | C(6)-C(7)-C(8)    | 109.7(4) |
| C(24)-P(1)-C(28) | 110.6(2)   | C(6)-C(7)-C(14)   | 112.8(4) |
| C(12)-P(1)-Rh(1) | 98.57(16)  | C(8)-C(7)-C(14)   | 111.8(4) |
| C(24)-P(1)-Rh(1) | 115.54(16) | C(6)-C(7)-C(15)   | 106.3(4) |
| C(28)-P(1)-Rh(1) | 119.09(17) | C(8)-C(7)-C(15)   | 107.9(4) |
| C(2)-P(2)-C(16)  | 101.2(2)   | C(14)-C(7)-C(15)  | 108.1(4) |
| C(2)-P(2)-C(20)  | 108.9(2)   | C(13)-C(8)-C(9)   | 117.4(4) |
| C(16)-P(2)-C(20) | 111.2(2)   | C(13)-C(8)-C(7)   | 119.1(4) |
| C(2)-P(2)-Rh(1)  | 99.64(16)  | C(9)-C(8)-C(7)    | 123.2(4) |
| C(16)-P(2)-Rh(1) | 114.48(17) | C(10)-C(9)-C(8)   | 121.6(5) |
| C(20)-P(2)-Rh(1) | 118.97(17) | C(10)-C(9)-H(9)   | 119.2    |
| C(13)-O(1)-C(1)  | 118.3(4)   | C(8)-C(9)-H(9)    | 119.2    |
| C(13)-O(1)-Rh(1) | 115.2(3)   | C(11)-C(10)-C(9)  | 119.9(5) |
| C(1)-O(1)-Rh(1)  | 115.2(3)   | C(11)-C(10)-H(10) | 120.0    |
| C(2)-C(1)-O(1)   | 118.7(4)   | C(9)-C(10)-H(10)  | 120.0    |
| C(2)-C(1)-C(6)   | 122.1(4)   | C(10)-C(11)-C(12) | 120.8(5) |

|                     |          |                     |          |
|---------------------|----------|---------------------|----------|
| C(10)-C(11)-H(11)   | 119.6    | C(16)-C(18)-H(18A)  | 109.5    |
| C(12)-C(11)-H(11)   | 119.6    | C(16)-C(18)-H(18B)  | 109.5    |
| C(11)-C(12)-C(13)   | 117.4(4) | H(18A)-C(18)-H(18B) | 109.5    |
| C(11)-C(12)-P(1)    | 122.7(4) | C(16)-C(18)-H(18C)  | 109.5    |
| C(13)-C(12)-P(1)    | 119.7(3) | H(18A)-C(18)-H(18C) | 109.5    |
| C(8)-C(13)-O(1)     | 119.8(4) | H(18B)-C(18)-H(18C) | 109.5    |
| C(8)-C(13)-C(12)    | 122.7(4) | C(16)-C(19)-H(19A)  | 109.5    |
| O(1)-C(13)-C(12)    | 117.3(4) | C(16)-C(19)-H(19B)  | 109.5    |
| C(7)-C(14)-H(14A)   | 109.5    | H(19A)-C(19)-H(19B) | 109.5    |
| C(7)-C(14)-H(14B)   | 109.5    | C(16)-C(19)-H(19C)  | 109.5    |
| H(14A)-C(14)-H(14B) | 109.5    | H(19A)-C(19)-H(19C) | 109.5    |
| C(7)-C(14)-H(14C)   | 109.5    | H(19B)-C(19)-H(19C) | 109.5    |
| H(14A)-C(14)-H(14C) | 109.5    | C(21)-C(20)-C(22)   | 108.6(5) |
| H(14B)-C(14)-H(14C) | 109.5    | C(21)-C(20)-C(23)   | 107.9(5) |
| C(7)-C(15)-H(15A)   | 109.5    | C(22)-C(20)-C(23)   | 107.4(4) |
| C(7)-C(15)-H(15B)   | 109.5    | C(21)-C(20)-P(2)    | 105.6(4) |
| H(15A)-C(15)-H(15B) | 109.5    | C(22)-C(20)-P(2)    | 117.0(4) |
| C(7)-C(15)-H(15C)   | 109.5    | C(23)-C(20)-P(2)    | 110.0(3) |
| H(15A)-C(15)-H(15C) | 109.5    | C(20)-C(21)-H(21A)  | 109.5    |
| H(15B)-C(15)-H(15C) | 109.5    | C(20)-C(21)-H(21B)  | 109.5    |
| C(18)-C(16)-C(19)   | 106.6(5) | H(21A)-C(21)-H(21B) | 109.5    |
| C(18)-C(16)-C(17)   | 110.4(5) | C(20)-C(21)-H(21C)  | 109.5    |
| C(19)-C(16)-C(17)   | 108.1(5) | H(21A)-C(21)-H(21C) | 109.5    |
| C(18)-C(16)-P(2)    | 116.1(4) | H(21B)-C(21)-H(21C) | 109.5    |
| C(19)-C(16)-P(2)    | 107.2(4) | C(20)-C(22)-H(22A)  | 109.5    |
| C(17)-C(16)-P(2)    | 108.1(4) | C(20)-C(22)-H(22B)  | 109.5    |
| C(16)-C(17)-H(17A)  | 109.5    | H(22A)-C(22)-H(22B) | 109.5    |
| C(16)-C(17)-H(17B)  | 109.5    | C(20)-C(22)-H(22C)  | 109.5    |
| H(17A)-C(17)-H(17B) | 109.5    | H(22A)-C(22)-H(22C) | 109.5    |
| C(16)-C(17)-H(17C)  | 109.5    | H(22B)-C(22)-H(22C) | 109.5    |
| H(17A)-C(17)-H(17C) | 109.5    | C(20)-C(23)-H(23A)  | 109.5    |
| H(17B)-C(17)-H(17C) | 109.5    | C(20)-C(23)-H(23B)  | 109.5    |

|                     |          |                     |           |
|---------------------|----------|---------------------|-----------|
| H(23A)-C(23)-H(23B) | 109.5    | C(30)-C(28)-P(1)    | 117.0(4)  |
| C(20)-C(23)-H(23C)  | 109.5    | C(29)-C(28)-P(1)    | 105.4(4)  |
| H(23A)-C(23)-H(23C) | 109.5    | C(28)-C(29)-H(29A)  | 109.5     |
| H(23B)-C(23)-H(23C) | 109.5    | C(28)-C(29)-H(29B)  | 109.5     |
| C(26)-C(24)-C(25)   | 110.2(4) | H(29A)-C(29)-H(29B) | 109.5     |
| C(26)-C(24)-C(27)   | 105.9(4) | C(28)-C(29)-H(29C)  | 109.5     |
| C(25)-C(24)-C(27)   | 108.8(5) | H(29A)-C(29)-H(29C) | 109.5     |
| C(26)-C(24)-P(1)    | 115.7(3) | H(29B)-C(29)-H(29C) | 109.5     |
| C(25)-C(24)-P(1)    | 108.8(4) | C(28)-C(30)-H(30A)  | 109.5     |
| C(27)-C(24)-P(1)    | 107.1(3) | C(28)-C(30)-H(30B)  | 109.5     |
| C(24)-C(25)-H(25A)  | 109.5    | H(30A)-C(30)-H(30B) | 109.5     |
| C(24)-C(25)-H(25B)  | 109.5    | C(28)-C(30)-H(30C)  | 109.5     |
| H(25A)-C(25)-H(25B) | 109.5    | H(30A)-C(30)-H(30C) | 109.5     |
| C(24)-C(25)-H(25C)  | 109.5    | H(30B)-C(30)-H(30C) | 109.5     |
| H(25A)-C(25)-H(25C) | 109.5    | C(28)-C(31)-H(31A)  | 109.5     |
| H(25B)-C(25)-H(25C) | 109.5    | C(28)-C(31)-H(31B)  | 109.5     |
| C(24)-C(26)-H(26A)  | 109.5    | H(31A)-C(31)-H(31B) | 109.5     |
| C(24)-C(26)-H(26B)  | 109.5    | C(28)-C(31)-H(31C)  | 109.5     |
| H(26A)-C(26)-H(26B) | 109.5    | H(31A)-C(31)-H(31C) | 109.5     |
| C(24)-C(26)-H(26C)  | 109.5    | H(31B)-C(31)-H(31C) | 109.5     |
| H(26A)-C(26)-H(26C) | 109.5    | Cl(3B)-Rh(2)-O(2)   | 175.0(7)  |
| H(26B)-C(26)-H(26C) | 109.5    | Cl(3B)-Rh(2)-P(3)   | 97.8(7)   |
| C(24)-C(27)-H(27A)  | 109.5    | O(2)-Rh(2)-P(3)     | 83.33(9)  |
| C(24)-C(27)-H(27B)  | 109.5    | Cl(3B)-Rh(2)-P(4)   | 95.5(7)   |
| H(27A)-C(27)-H(27B) | 109.5    | O(2)-Rh(2)-P(4)     | 81.83(9)  |
| C(24)-C(27)-H(27C)  | 109.5    | P(3)-Rh(2)-P(4)     | 156.00(5) |
| H(27A)-C(27)-H(27C) | 109.5    | Cl(3B)-Rh(2)-Cl(2A) | 89.1(7)   |
| H(27B)-C(27)-H(27C) | 109.5    | O(2)-Rh(2)-Cl(2A)   | 95.62(11) |
| C(31)-C(28)-C(30)   | 108.8(4) | P(3)-Rh(2)-Cl(2A)   | 97.85(5)  |
| C(31)-C(28)-C(29)   | 108.6(5) | P(4)-Rh(2)-Cl(2A)   | 102.27(5) |
| C(30)-C(28)-C(29)   | 107.5(4) | Cl(3B)-Rh(2)-H(4A)  | 93.5(7)   |
| C(31)-C(28)-P(1)    | 109.2(4) | O(2)-Rh(2)-H(4A)    | 81.9(4)   |

|                      |            |                   |          |
|----------------------|------------|-------------------|----------|
| P(3)-Rh(2)-H(4A)     | 79.8(2)    | O(2)-C(32)-C(37)  | 118.1(4) |
| P(4)-Rh(2)-H(4A)     | 79.5(2)    | C(32)-C(33)-C(34) | 117.1(5) |
| Cl(2A)-Rh(2)-H(4A)   | 176.7(3)   | C(32)-C(33)-P(3)  | 120.3(4) |
| Cl(3B)-Rh(2)-H(3A)   | 18(3)      | C(34)-C(33)-P(3)  | 122.5(4) |
| O(2)-Rh(2)-H(3A)     | 167(3)     | C(35)-C(34)-C(33) | 121.7(5) |
| P(3)-Rh(2)-H(3A)     | 96(3)      | C(35)-C(34)-H(34) | 119.1    |
| P(4)-Rh(2)-H(3A)     | 103(3)     | C(33)-C(34)-H(34) | 119.1    |
| Cl(2A)-Rh(2)-H(3A)   | 72(3)      | C(34)-C(35)-C(36) | 119.8(5) |
| H(4A)-Rh(2)-H(3A)    | 111(3)     | C(34)-C(35)-H(35) | 120.1    |
| C(33)-P(3)-C(47)     | 103.2(2)   | C(36)-C(35)-H(35) | 120.1    |
| C(33)-P(3)-C(51)     | 106.0(2)   | C(37)-C(36)-C(35) | 120.7(5) |
| C(47)-P(3)-C(51)     | 111.6(3)   | C(37)-C(36)-H(36) | 119.6    |
| C(33)-P(3)-Rh(2)     | 100.27(16) | C(35)-C(36)-H(36) | 119.6    |
| C(47)-P(3)-Rh(2)     | 113.78(19) | C(36)-C(37)-C(32) | 118.0(5) |
| C(51)-P(3)-Rh(2)     | 119.56(19) | C(36)-C(37)-C(38) | 122.4(4) |
| C(43)-P(4)-C(55)     | 105.7(3)   | C(32)-C(37)-C(38) | 119.4(4) |
| C(43)-P(4)-C(59)     | 101.9(2)   | C(45)-C(38)-C(39) | 112.9(4) |
| C(55)-P(4)-C(59)     | 112.1(3)   | C(45)-C(38)-C(37) | 112.0(4) |
| C(43)-P(4)-Rh(2)     | 100.59(17) | C(39)-C(38)-C(37) | 108.2(4) |
| C(55)-P(4)-Rh(2)     | 116.37(19) | C(45)-C(38)-C(46) | 108.1(4) |
| C(59)-P(4)-Rh(2)     | 117.46(18) | C(39)-C(38)-C(46) | 106.8(4) |
| Cl(3B)-C(63B)-H(63A) | 112.4      | C(37)-C(38)-C(46) | 108.6(4) |
| Cl(3B)-C(63B)-H(63B) | 112.4      | C(40)-C(39)-C(44) | 117.5(5) |
| H(63A)-C(63B)-H(63B) | 110.0      | C(40)-C(39)-C(38) | 123.6(5) |
| Rh(2)-Cl(3B)-C(63B)  | 94(2)      | C(44)-C(39)-C(38) | 118.5(4) |
| Rh(2)-Cl(3B)-H(3A)   | 50(3)      | C(41)-C(40)-C(39) | 121.0(5) |
| C(63B)-Cl(3B)-H(3A)  | 49(6)      | C(41)-C(40)-H(40) | 119.5    |
| C(44)-O(2)-C(32)     | 118.3(4)   | C(39)-C(40)-H(40) | 119.5    |
| C(44)-O(2)-Rh(2)     | 117.2(3)   | C(42)-C(41)-C(40) | 120.2(5) |
| C(32)-O(2)-Rh(2)     | 116.4(3)   | C(42)-C(41)-H(41) | 119.9    |
| C(33)-C(32)-O(2)     | 119.3(4)   | C(40)-C(41)-H(41) | 119.9    |
| C(33)-C(32)-C(37)    | 122.5(5)   | C(41)-C(42)-C(43) | 121.3(5) |

|                     |          |                     |          |
|---------------------|----------|---------------------|----------|
| C(41)-C(42)-H(42)   | 119.4    | C(47)-C(49)-H(49A)  | 109.5    |
| C(43)-C(42)-H(42)   | 119.4    | C(47)-C(49)-H(49B)  | 109.5    |
| C(42)-C(43)-C(44)   | 117.2(5) | H(49A)-C(49)-H(49B) | 109.5    |
| C(42)-C(43)-P(4)    | 123.3(4) | C(47)-C(49)-H(49C)  | 109.5    |
| C(44)-C(43)-P(4)    | 119.3(4) | H(49A)-C(49)-H(49C) | 109.5    |
| C(43)-C(44)-C(39)   | 122.5(5) | H(49B)-C(49)-H(49C) | 109.5    |
| C(43)-C(44)-O(2)    | 118.3(4) | C(47)-C(50)-H(50A)  | 109.5    |
| C(39)-C(44)-O(2)    | 119.1(4) | C(47)-C(50)-H(50B)  | 109.5    |
| C(38)-C(45)-H(45A)  | 109.5    | H(50A)-C(50)-H(50B) | 109.5    |
| C(38)-C(45)-H(45B)  | 109.5    | C(47)-C(50)-H(50C)  | 109.5    |
| H(45A)-C(45)-H(45B) | 109.5    | H(50A)-C(50)-H(50C) | 109.5    |
| C(38)-C(45)-H(45C)  | 109.5    | H(50B)-C(50)-H(50C) | 109.5    |
| H(45A)-C(45)-H(45C) | 109.5    | C(54)-C(51)-C(52)   | 111.3(5) |
| H(45B)-C(45)-H(45C) | 109.5    | C(54)-C(51)-C(53)   | 107.2(5) |
| C(38)-C(46)-H(46A)  | 109.5    | C(52)-C(51)-C(53)   | 105.7(5) |
| C(38)-C(46)-H(46B)  | 109.5    | C(54)-C(51)-P(3)    | 107.9(4) |
| H(46A)-C(46)-H(46B) | 109.5    | C(52)-C(51)-P(3)    | 106.6(4) |
| C(38)-C(46)-H(46C)  | 109.5    | C(53)-C(51)-P(3)    | 118.2(4) |
| H(46A)-C(46)-H(46C) | 109.5    | C(51)-C(52)-H(52A)  | 109.5    |
| H(46B)-C(46)-H(46C) | 109.5    | C(51)-C(52)-H(52B)  | 109.5    |
| C(49)-C(47)-C(50)   | 106.8(5) | H(52A)-C(52)-H(52B) | 109.5    |
| C(49)-C(47)-C(48)   | 108.4(5) | C(51)-C(52)-H(52C)  | 109.5    |
| C(50)-C(47)-C(48)   | 109.5(5) | H(52A)-C(52)-H(52C) | 109.5    |
| C(49)-C(47)-P(3)    | 117.1(4) | H(52B)-C(52)-H(52C) | 109.5    |
| C(50)-C(47)-P(3)    | 107.4(4) | C(51)-C(53)-H(53A)  | 109.5    |
| C(48)-C(47)-P(3)    | 107.6(4) | C(51)-C(53)-H(53B)  | 109.5    |
| C(47)-C(48)-H(48A)  | 109.5    | H(53A)-C(53)-H(53B) | 109.5    |
| C(47)-C(48)-H(48B)  | 109.5    | C(51)-C(53)-H(53C)  | 109.5    |
| H(48A)-C(48)-H(48B) | 109.5    | H(53A)-C(53)-H(53C) | 109.5    |
| C(47)-C(48)-H(48C)  | 109.5    | H(53B)-C(53)-H(53C) | 109.5    |
| H(48A)-C(48)-H(48C) | 109.5    | C(51)-C(54)-H(54A)  | 109.5    |
| H(48B)-C(48)-H(48C) | 109.5    | C(51)-C(54)-H(54B)  | 109.5    |

|                     |          |                     |          |
|---------------------|----------|---------------------|----------|
| H(54A)-C(54)-H(54B) | 109.5    | H(58A)-C(58)-H(58C) | 109.5    |
| C(51)-C(54)-H(54C)  | 109.5    | H(58B)-C(58)-H(58C) | 109.5    |
| H(54A)-C(54)-H(54C) | 109.5    | C(61)-C(59)-C(62)   | 106.0(5) |
| H(54B)-C(54)-H(54C) | 109.5    | C(61)-C(59)-C(60)   | 109.8(5) |
| C(57)-C(55)-C(58)   | 108.4(5) | C(62)-C(59)-C(60)   | 110.1(5) |
| C(57)-C(55)-C(56)   | 107.2(5) | C(61)-C(59)-P(4)    | 118.2(4) |
| C(58)-C(55)-C(56)   | 107.1(5) | C(62)-C(59)-P(4)    | 105.6(4) |
| C(57)-C(55)-P(4)    | 117.3(4) | C(60)-C(59)-P(4)    | 106.9(4) |
| C(58)-C(55)-P(4)    | 108.8(4) | C(59)-C(60)-H(60A)  | 109.5    |
| C(56)-C(55)-P(4)    | 107.6(4) | C(59)-C(60)-H(60B)  | 109.5    |
| C(55)-C(56)-H(56A)  | 109.5    | H(60A)-C(60)-H(60B) | 109.5    |
| C(55)-C(56)-H(56B)  | 109.5    | C(59)-C(60)-H(60C)  | 109.5    |
| H(56A)-C(56)-H(56B) | 109.5    | H(60A)-C(60)-H(60C) | 109.5    |
| C(55)-C(56)-H(56C)  | 109.5    | H(60B)-C(60)-H(60C) | 109.5    |
| H(56A)-C(56)-H(56C) | 109.5    | C(59)-C(61)-H(61A)  | 109.5    |
| H(56B)-C(56)-H(56C) | 109.5    | C(59)-C(61)-H(61B)  | 109.5    |
| C(55)-C(57)-H(57A)  | 109.5    | H(61A)-C(61)-H(61B) | 109.5    |
| C(55)-C(57)-H(57B)  | 109.5    | C(59)-C(61)-H(61C)  | 109.5    |
| H(57A)-C(57)-H(57B) | 109.5    | H(61A)-C(61)-H(61C) | 109.5    |
| C(55)-C(57)-H(57C)  | 109.5    | H(61B)-C(61)-H(61C) | 109.5    |
| H(57A)-C(57)-H(57C) | 109.5    | C(59)-C(62)-H(62A)  | 109.5    |
| H(57B)-C(57)-H(57C) | 109.5    | C(59)-C(62)-H(62B)  | 109.5    |
| C(55)-C(58)-H(58A)  | 109.5    | H(62A)-C(62)-H(62B) | 109.5    |
| C(55)-C(58)-H(58B)  | 109.5    | C(59)-C(62)-H(62C)  | 109.5    |
| H(58A)-C(58)-H(58B) | 109.5    | H(62A)-C(62)-H(62C) | 109.5    |
| C(55)-C(58)-H(58C)  | 109.5    | H(62B)-C(62)-H(62C) | 109.5    |

---



Table D5. Anisotropic displacement parameters ( $\text{\AA}^2 \times 10^3$ ) for *cis*-(<sup>t</sup>Bu<sub>2</sub>xanPOP)Rh(H)<sub>2</sub>Cl. The anisotropic displacement factor exponent takes the form:  $-2\pi^2 [ h^2 a^{*2} U^{11} + \dots + 2 h k a^* b^* U^{12} ]$

|       | U <sup>11</sup> | U <sup>22</sup> | U <sup>33</sup> | U <sup>23</sup> | U <sup>13</sup> | U <sup>12</sup> |
|-------|-----------------|-----------------|-----------------|-----------------|-----------------|-----------------|
| Rh(1) | 13(1)           | 7(1)            | 14(1)           | 2(1)            | 3(1)            | 0(1)            |
| P(1)  | 12(1)           | 8(1)            | 13(1)           | 0(1)            | 2(1)            | 0(1)            |
| P(2)  | 14(1)           | 8(1)            | 16(1)           | 2(1)            | 2(1)            | 1(1)            |
| Cl(1) | 22(1)           | 14(1)           | 18(1)           | -2(1)           | -3(1)           | 1(1)            |
| O(1)  | 8(1)            | 10(2)           | 16(2)           | 3(1)            | 3(1)            | 2(1)            |
| C(1)  | 12(2)           | 13(2)           | 16(2)           | -4(2)           | 0(2)            | 1(2)            |
| C(2)  | 14(2)           | 15(2)           | 18(2)           | 0(2)            | 2(2)            | 2(2)            |
| C(3)  | 15(2)           | 22(2)           | 21(2)           | 2(2)            | 0(2)            | 6(2)            |
| C(4)  | 17(2)           | 33(3)           | 25(3)           | 4(2)            | 5(2)            | 9(2)            |
| C(5)  | 15(2)           | 25(3)           | 19(2)           | 3(2)            | 3(2)            | 1(2)            |
| C(6)  | 8(2)            | 14(2)           | 16(2)           | 0(2)            | 1(2)            | 0(2)            |
| C(7)  | 19(2)           | 11(2)           | 13(2)           | -2(2)           | 5(2)            | 0(2)            |
| C(8)  | 13(2)           | 14(2)           | 13(2)           | 0(2)            | 0(2)            | 0(2)            |
| C(9)  | 22(2)           | 14(2)           | 18(2)           | 4(2)            | 4(2)            | -4(2)           |
| C(10) | 25(3)           | 13(2)           | 22(2)           | 6(2)            | 1(2)            | 2(2)            |
| C(11) | 16(2)           | 11(2)           | 22(2)           | 2(2)            | 3(2)            | 1(2)            |
| C(12) | 12(2)           | 11(2)           | 12(2)           | 0(2)            | 0(2)            | -3(2)           |
| C(13) | 8(2)            | 8(2)            | 14(2)           | 0(2)            | 0(2)            | -2(2)           |
| C(14) | 14(2)           | 23(2)           | 15(2)           | 2(2)            | 3(2)            | -4(2)           |
| C(15) | 23(3)           | 15(2)           | 17(2)           | -2(2)           | 1(2)            | -2(2)           |
| C(16) | 20(2)           | 8(2)            | 32(3)           | -4(2)           | -4(2)           | 2(2)            |
| C(17) | 36(3)           | 15(3)           | 54(4)           | 2(3)            | 3(3)            | -10(2)          |
| C(18) | 34(3)           | 18(3)           | 53(4)           | -17(3)          | -11(3)          | 12(2)           |
| C(19) | 26(3)           | 22(3)           | 27(3)           | -12(2)          | -6(2)           | 1(2)            |
| C(20) | 21(2)           | 14(2)           | 19(2)           | 6(2)            | 3(2)            | 3(2)            |
| C(21) | 29(3)           | 38(3)           | 22(3)           | 10(2)           | 7(2)            | 6(3)            |
| C(22) | 34(3)           | 17(2)           | 29(3)           | 9(2)            | -4(2)           | 5(2)            |
| C(23) | 29(3)           | 18(2)           | 21(3)           | 0(2)            | -4(2)           | 3(2)            |
| C(24) | 14(2)           | 11(2)           | 17(2)           | -2(2)           | -2(2)           | -4(2)           |
| C(25) | 14(2)           | 27(3)           | 39(3)           | 8(3)            | -4(2)           | -8(2)           |
| C(26) | 25(3)           | 21(3)           | 16(2)           | 0(2)            | -7(2)           | 3(2)            |

|        |       |        |        |         |       |        |
|--------|-------|--------|--------|---------|-------|--------|
| C(27)  | 30(3) | 18(3)  | 27(3)  | -9(2)   | -6(2) | 5(2)   |
| C(28)  | 22(2) | 13(2)  | 18(2)  | -1(2)   | 6(2)  | 5(2)   |
| C(29)  | 35(3) | 27(3)  | 19(3)  | 6(2)    | 13(2) | 11(2)  |
| C(30)  | 26(3) | 19(3)  | 23(3)  | 0(2)    | 5(2)  | 9(2)   |
| C(31)  | 25(3) | 20(3)  | 34(3)  | -14(2)  | -4(2) | 7(2)   |
| Rh(2)  | 18(1) | 18(1)  | 24(1)  | -3(1)   | 1(1)  | -1(1)  |
| P(3)   | 13(1) | 14(1)  | 16(1)  | 1(1)    | -2(1) | 0(1)   |
| P(4)   | 13(1) | 12(1)  | 24(1)  | -1(1)   | 2(1)  | 1(1)   |
| Cl(2A) | 53(1) | 31(1)  | 35(1)  | -2(1)   | 17(1) | -12(1) |
| Cl(2B) | 53(1) | 31(1)  | 35(1)  | -2(1)   | 17(1) | -12(1) |
| Cl(3B) | 47(9) | 67(13) | 96(14) | -46(11) | -2(8) | 11(9)  |
| O(2)   | 20(2) | 11(2)  | 17(2)  | -2(1)   | -2(1) | 3(1)   |
| C(32)  | 12(2) | 10(2)  | 21(2)  | 3(2)    | 3(2)  | 0(2)   |
| C(33)  | 19(2) | 12(2)  | 16(2)  | 1(2)    | 3(2)  | -2(2)  |
| C(34)  | 16(2) | 13(2)  | 22(2)  | -2(2)   | -2(2) | -1(2)  |
| C(35)  | 18(2) | 11(2)  | 29(3)  | 1(2)    | 1(2)  | 3(2)   |
| C(36)  | 16(2) | 16(2)  | 18(2)  | 4(2)    | 1(2)  | 3(2)   |
| C(37)  | 12(2) | 11(2)  | 18(2)  | 1(2)    | 1(2)  | -3(2)  |
| C(38)  | 14(2) | 16(2)  | 15(2)  | 0(2)    | 1(2)  | 1(2)   |
| C(39)  | 14(2) | 15(2)  | 17(2)  | 4(2)    | 2(2)  | 2(2)   |
| C(40)  | 28(3) | 24(3)  | 20(2)  | 1(2)    | 1(2)  | 2(2)   |
| C(41)  | 35(3) | 33(3)  | 17(2)  | -3(2)   | 3(2)  | 8(3)   |
| C(42)  | 27(3) | 22(3)  | 27(3)  | -7(2)   | 7(2)  | 8(2)   |
| C(43)  | 19(2) | 16(2)  | 21(2)  | -1(2)   | 3(2)  | -1(2)  |
| C(44)  | 16(2) | 10(2)  | 17(2)  | 1(2)    | 2(2)  | 0(2)   |
| C(45)  | 21(3) | 25(3)  | 21(3)  | 2(2)    | -3(2) | 7(2)   |
| C(46)  | 20(3) | 28(3)  | 21(3)  | -7(2)   | 3(2)  | -8(2)  |
| C(47)  | 14(2) | 21(3)  | 28(3)  | 3(2)    | 1(2)  | -4(2)  |
| C(48)  | 17(3) | 36(3)  | 34(3)  | 5(3)    | 2(2)  | -2(2)  |
| C(49)  | 27(3) | 24(3)  | 68(5)  | -6(3)   | 12(3) | -10(2) |
| C(50)  | 25(3) | 37(3)  | 33(3)  | 12(3)   | 8(2)  | -6(3)  |
| C(51)  | 25(3) | 25(3)  | 18(2)  | 4(2)    | 0(2)  | 3(2)   |
| C(52)  | 30(3) | 30(3)  | 20(3)  | 4(2)    | -3(2) | 6(2)   |
| C(53)  | 49(4) | 29(3)  | 26(3)  | -6(3)   | 2(3)  | 0(3)   |
| C(54)  | 33(3) | 36(3)  | 31(3)  | 5(3)    | 10(3) | -3(3)  |
| C(55)  | 17(2) | 24(3)  | 36(3)  | -2(2)   | 13(2) | -2(2)  |

|       |       |       |       |        |       |        |
|-------|-------|-------|-------|--------|-------|--------|
| C(56) | 17(3) | 34(3) | 51(4) | 3(3)   | 0(3)  | 6(2)   |
| C(57) | 28(3) | 30(3) | 55(4) | -11(3) | 17(3) | -2(3)  |
| C(58) | 24(3) | 27(3) | 44(4) | -2(3)  | 17(3) | -5(2)  |
| C(59) | 22(2) | 14(2) | 27(3) | 2(2)   | 7(2)  | -3(2)  |
| C(60) | 36(3) | 20(3) | 47(4) | 9(3)   | 0(3)  | -1(2)  |
| C(61) | 54(4) | 33(4) | 46(4) | -11(3) | 16(3) | -22(3) |
| C(62) | 36(3) | 24(3) | 46(4) | 5(3)   | 13(3) | -4(3)  |

---

Table D6. Hydrogen coordinates ( $\times 10^4$ ) and isotropic displacement parameters ( $\text{\AA}^2 \times 10^{-3}$ )  
for *cis*-(<sup>t</sup>Bu<sub>xan</sub>POP)Rh(H)<sub>2</sub>Cl.

|        | x       | y        | z        | U(eq) |
|--------|---------|----------|----------|-------|
| H(1)   | 807(17) | 5020(50) | 5300(20) | 17    |
| H(2)   | 649(13) | 4410(40) | 4160(30) | 17    |
| H(3)   | 2338    | 3190     | 4397     | 23    |
| H(4)   | 2794    | 3822     | 3534     | 30    |
| H(5)   | 2598    | 5284     | 2611     | 24    |
| H(9)   | 1656    | 8674     | 1994     | 22    |
| H(10)  | 1136    | 9793     | 2431     | 24    |
| H(11)  | 686     | 9003     | 3256     | 19    |
| H(14A) | 2364    | 7559     | 2397     | 26    |
| H(14B) | 2093    | 7595     | 1527     | 26    |
| H(14C) | 2404    | 6549     | 1765     | 26    |
| H(15A) | 1801    | 5153     | 1421     | 28    |
| H(15B) | 1529    | 6266     | 1152     | 28    |
| H(15C) | 1378    | 5386     | 1787     | 28    |
| H(17A) | 811     | 1261     | 4171     | 53    |
| H(17B) | 733     | 2480     | 4563     | 53    |
| H(17C) | 1053    | 1595     | 5034     | 53    |
| H(18A) | 1507    | 892      | 3643     | 55    |
| H(18B) | 1732    | 1190     | 4527     | 55    |
| H(18C) | 1858    | 1863     | 3761     | 55    |
| H(19A) | 1336    | 3096     | 2949     | 39    |
| H(19B) | 900     | 3363     | 3257     | 39    |
| H(19C) | 992     | 2111     | 2931     | 39    |
| H(21A) | 1554    | 3411     | 6823     | 44    |
| H(21B) | 1204    | 2983     | 6124     | 44    |
| H(21C) | 1311    | 4319     | 6218     | 44    |
| H(22A) | 2070    | 2122     | 6383     | 41    |
| H(22B) | 2167    | 2126     | 5470     | 41    |
| H(22C) | 1735    | 1630     | 5681     | 41    |
| H(23A) | 1985    | 5063     | 5878     | 35    |
| H(23B) | 2321    | 4193     | 5606     | 35    |

|        |          |          |          |    |
|--------|----------|----------|----------|----|
| H(23C) | 2212     | 4166     | 6512     | 35 |
| H(25A) | -301     | 6166     | 3837     | 41 |
| H(25B) | -39      | 5007     | 3813     | 41 |
| H(25C) | -365     | 5364     | 3054     | 41 |
| H(26A) | -201     | 6999     | 2161     | 33 |
| H(26B) | 214      | 7732     | 2398     | 33 |
| H(26C) | -159     | 7818     | 2935     | 33 |
| H(27A) | 511      | 4861     | 2875     | 38 |
| H(27B) | 593      | 5934     | 2321     | 38 |
| H(27C) | 168      | 5230     | 2145     | 38 |
| H(29A) | 491      | 6604     | 5636     | 39 |
| H(29B) | 34       | 6512     | 5150     | 39 |
| H(29C) | 147      | 7541     | 5772     | 39 |
| H(30A) | -67      | 8996     | 4773     | 34 |
| H(30B) | -212     | 8008     | 4135     | 34 |
| H(30C) | 97       | 8992     | 3912     | 34 |
| H(31A) | 810      | 9103     | 4636     | 41 |
| H(31B) | 986      | 8111     | 5247     | 41 |
| H(31C) | 651      | 9003     | 5499     | 41 |
| H(4A)  | 4167(3)  | 5416(7)  | 939(5)   | 30 |
| H(3A)  | 4230(20) | 4180(70) | 2250(40) | 25 |
| H(63A) | 4181     | 3084     | 3416     | 36 |
| H(63B) | 4093     | 2236     | 2645     | 36 |
| H(34)  | 3492     | 8738     | 2132     | 20 |
| H(35)  | 2928     | 9571     | 1351     | 23 |
| H(36)  | 2586     | 8588     | 244      | 20 |
| H(40)  | 2723     | 5513     | -1765    | 29 |
| H(41)  | 3153     | 4088     | -2170    | 34 |
| H(42)  | 3622     | 3158     | -1227    | 30 |
| H(45A) | 2244     | 7620     | -660     | 34 |
| H(45B) | 2287     | 6638     | -1312    | 34 |
| H(45C) | 2634     | 7615     | -1155    | 34 |
| H(46A) | 2160     | 6147     | 340      | 34 |
| H(46B) | 2512     | 5197     | 568      | 34 |
| H(46C) | 2221     | 5137     | -281     | 34 |
| H(48A) | 5030     | 7286     | 1951     | 43 |

|        |      |      |      |    |
|--------|------|------|------|----|
| H(48B) | 4789 | 6088 | 1833 | 43 |
| H(48C) | 4827 | 6733 | 2683 | 43 |
| H(49A) | 4491 | 8650 | 2751 | 59 |
| H(49B) | 4165 | 9093 | 2017 | 59 |
| H(49C) | 4651 | 9089 | 1939 | 59 |
| H(50A) | 4071 | 8004 | 734  | 47 |
| H(50B) | 4313 | 6820 | 665  | 47 |
| H(50C) | 4564 | 8005 | 736  | 47 |
| H(52A) | 4144 | 5927 | 4261 | 41 |
| H(52B) | 4461 | 6057 | 3608 | 41 |
| H(52C) | 4103 | 5104 | 3489 | 41 |
| H(53A) | 3848 | 8541 | 3292 | 52 |
| H(53B) | 4290 | 8055 | 3678 | 52 |
| H(53C) | 3897 | 7945 | 4161 | 52 |
| H(54A) | 3352 | 5749 | 3054 | 49 |
| H(54B) | 3254 | 7094 | 3052 | 49 |
| H(54C) | 3400 | 6447 | 3884 | 49 |
| H(56A) | 4682 | 2427 | 1126 | 52 |
| H(56B) | 4763 | 3779 | 1098 | 52 |
| H(56C) | 5002 | 2929 | 565  | 52 |
| H(57A) | 4162 | 2131 | -879 | 55 |
| H(57B) | 4403 | 1438 | -136 | 55 |
| H(57C) | 4658 | 2164 | -719 | 55 |
| H(58A) | 4769 | 4255 | -498 | 46 |
| H(58B) | 4422 | 4951 | -104 | 46 |
| H(58C) | 4299 | 4261 | -927 | 46 |
| H(60A) | 3666 | 793  | 1549 | 53 |
| H(60B) | 3872 | 1988 | 1852 | 53 |
| H(60C) | 4102 | 1169 | 1284 | 53 |
| H(61A) | 3336 | 632  | 45   | 65 |
| H(61B) | 3808 | 823  | -99  | 65 |
| H(61C) | 3451 | 1625 | -547 | 65 |
| H(62A) | 3013 | 2698 | 311  | 52 |
| H(62B) | 3186 | 2988 | 1227 | 52 |
| H(62C) | 3020 | 1727 | 988  | 52 |

---

Table D7. Torsion angles [°] for *cis*-(<sup>t</sup>Bu<sub>xan</sub>POP)Rh(H)<sub>2</sub>Cl.

|                        |            |                       |           |
|------------------------|------------|-----------------------|-----------|
| O(1)-Rh(1)-P(1)-C(12)  | -20.61(17) | O(1)-C(1)-C(2)-P(2)   | 2.1(6)    |
| P(2)-Rh(1)-P(1)-C(12)  | -44.0(2)   | C(6)-C(1)-C(2)-P(2)   | -173.3(4) |
| Cl(1)-Rh(1)-P(1)-C(12) | 59.68(15)  | C(16)-P(2)-C(2)-C(1)  | 101.4(4)  |
| O(1)-Rh(1)-P(1)-C(24)  | 84.9(2)    | C(20)-P(2)-C(2)-C(1)  | -141.3(4) |
| P(2)-Rh(1)-P(1)-C(24)  | 61.5(2)    | Rh(1)-P(2)-C(2)-C(1)  | -16.1(4)  |
| Cl(1)-Rh(1)-P(1)-C(24) | 165.18(18) | C(16)-P(2)-C(2)-C(3)  | -74.5(5)  |
| O(1)-Rh(1)-P(1)-C(28)  | -139.8(2)  | C(20)-P(2)-C(2)-C(3)  | 42.8(5)   |
| P(2)-Rh(1)-P(1)-C(28)  | -163.2(2)  | Rh(1)-P(2)-C(2)-C(3)  | 168.0(4)  |
| Cl(1)-Rh(1)-P(1)-C(28) | -59.5(2)   | C(1)-C(2)-C(3)-C(4)   | -0.7(8)   |
| O(1)-Rh(1)-P(2)-C(2)   | 16.22(19)  | P(2)-C(2)-C(3)-C(4)   | 175.3(4)  |
| P(1)-Rh(1)-P(2)-C(2)   | 39.6(2)    | C(2)-C(3)-C(4)-C(5)   | -1.1(9)   |
| Cl(1)-Rh(1)-P(2)-C(2)  | -64.07(17) | C(3)-C(4)-C(5)-C(6)   | 0.8(9)    |
| O(1)-Rh(1)-P(2)-C(16)  | -90.9(2)   | C(4)-C(5)-C(6)-C(1)   | 1.2(8)    |
| P(1)-Rh(1)-P(2)-C(16)  | -67.5(3)   | C(4)-C(5)-C(6)-C(7)   | -173.5(5) |
| Cl(1)-Rh(1)-P(2)-C(16) | -171.1(2)  | C(2)-C(1)-C(6)-C(5)   | -3.1(7)   |
| O(1)-Rh(1)-P(2)-C(20)  | 134.2(2)   | O(1)-C(1)-C(6)-C(5)   | -178.5(4) |
| P(1)-Rh(1)-P(2)-C(20)  | 157.6(2)   | C(2)-C(1)-C(6)-C(7)   | 171.8(4)  |
| Cl(1)-Rh(1)-P(2)-C(20) | 53.90(19)  | O(1)-C(1)-C(6)-C(7)   | -3.6(7)   |
| P(2)-Rh(1)-O(1)-C(13)  | -162.6(3)  | C(5)-C(6)-C(7)-C(8)   | -152.8(5) |
| P(1)-Rh(1)-O(1)-C(13)  | 24.1(3)    | C(1)-C(6)-C(7)-C(8)   | 32.6(6)   |
| Cl(1)-Rh(1)-O(1)-C(13) | -69.2(3)   | C(5)-C(6)-C(7)-C(14)  | -27.4(7)  |
| P(2)-Rh(1)-O(1)-C(1)   | -19.5(3)   | C(1)-C(6)-C(7)-C(14)  | 158.0(4)  |
| P(1)-Rh(1)-O(1)-C(1)   | 167.2(3)   | C(5)-C(6)-C(7)-C(15)  | 90.8(6)   |
| Cl(1)-Rh(1)-O(1)-C(1)  | 73.9(3)    | C(1)-C(6)-C(7)-C(15)  | -83.8(5)  |
| C(13)-O(1)-C(1)-C(2)   | 156.5(4)   | C(6)-C(7)-C(8)-C(13)  | -34.2(6)  |
| Rh(1)-O(1)-C(1)-C(2)   | 14.6(5)    | C(14)-C(7)-C(8)-C(13) | -160.0(4) |
| C(13)-O(1)-C(1)-C(6)   | -27.9(6)   | C(15)-C(7)-C(8)-C(13) | 81.3(5)   |
| Rh(1)-O(1)-C(1)-C(6)   | -169.8(3)  | C(6)-C(7)-C(8)-C(9)   | 153.2(5)  |
| O(1)-C(1)-C(2)-C(3)    | 178.2(4)   | C(14)-C(7)-C(8)-C(9)  | 27.4(7)   |
| C(6)-C(1)-C(2)-C(3)    | 2.8(7)     | C(15)-C(7)-C(8)-C(9)  | -91.3(6)  |

|                         |           |                         |            |
|-------------------------|-----------|-------------------------|------------|
| C(13)-C(8)-C(9)-C(10)   | -0.7(7)   | Rh(1)-P(2)-C(16)-C(17)  | -69.7(4)   |
| C(7)-C(8)-C(9)-C(10)    | 172.1(5)  | C(2)-P(2)-C(20)-C(21)   | 153.2(4)   |
| C(8)-C(9)-C(10)-C(11)   | -3.0(8)   | C(16)-P(2)-C(20)-C(21)  | -96.2(4)   |
| C(9)-C(10)-C(11)-C(12)  | 2.8(8)    | Rh(1)-P(2)-C(20)-C(21)  | 40.1(4)    |
| C(10)-C(11)-C(12)-C(13) | 0.9(7)    | C(2)-P(2)-C(20)-C(22)   | -85.9(5)   |
| C(10)-C(11)-C(12)-P(1)  | -173.4(4) | C(16)-P(2)-C(20)-C(22)  | 24.8(5)    |
| C(24)-P(1)-C(12)-C(11)  | 77.9(4)   | Rh(1)-P(2)-C(20)-C(22)  | 161.1(4)   |
| C(28)-P(1)-C(12)-C(11)  | -38.6(5)  | C(2)-P(2)-C(20)-C(23)   | 37.0(4)    |
| Rh(1)-P(1)-C(12)-C(11)  | -164.1(4) | C(16)-P(2)-C(20)-C(23)  | 147.6(4)   |
| C(24)-P(1)-C(12)-C(13)  | -96.3(4)  | Rh(1)-P(2)-C(20)-C(23)  | -76.1(4)   |
| C(28)-P(1)-C(12)-C(13)  | 147.2(4)  | C(12)-P(1)-C(24)-C(26)  | -57.1(4)   |
| Rh(1)-P(1)-C(12)-C(13)  | 21.7(4)   | C(28)-P(1)-C(24)-C(26)  | 59.3(4)    |
| C(9)-C(8)-C(13)-O(1)    | 179.2(4)  | Rh(1)-P(1)-C(24)-C(26)  | -161.7(3)  |
| C(7)-C(8)-C(13)-O(1)    | 6.2(7)    | C(12)-P(1)-C(24)-C(25)  | 178.2(4)   |
| C(9)-C(8)-C(13)-C(12)   | 4.7(7)    | C(28)-P(1)-C(24)-C(25)  | -65.4(4)   |
| C(7)-C(8)-C(13)-C(12)   | -168.4(4) | Rh(1)-P(1)-C(24)-C(25)  | 73.6(4)    |
| C(1)-O(1)-C(13)-C(8)    | 26.7(6)   | C(12)-P(1)-C(24)-C(27)  | 60.7(4)    |
| Rh(1)-O(1)-C(13)-C(8)   | 168.6(3)  | C(28)-P(1)-C(24)-C(27)  | 177.1(4)   |
| C(1)-O(1)-C(13)-C(12)   | -158.4(4) | Rh(1)-P(1)-C(24)-C(27)  | -43.9(4)   |
| Rh(1)-O(1)-C(13)-C(12)  | -16.5(5)  | C(12)-P(1)-C(28)-C(31)  | -39.2(4)   |
| C(11)-C(12)-C(13)-C(8)  | -4.8(7)   | C(24)-P(1)-C(28)-C(31)  | -148.9(4)  |
| P(1)-C(12)-C(13)-C(8)   | 169.7(4)  | Rh(1)-P(1)-C(28)-C(31)  | 73.7(4)    |
| C(11)-C(12)-C(13)-O(1)  | -179.5(4) | C(12)-P(1)-C(28)-C(30)  | 84.9(4)    |
| P(1)-C(12)-C(13)-O(1)   | -5.0(6)   | C(24)-P(1)-C(28)-C(30)  | -24.9(5)   |
| C(2)-P(2)-C(16)-C(18)   | 59.5(5)   | Rh(1)-P(1)-C(28)-C(30)  | -162.2(3)  |
| C(20)-P(2)-C(16)-C(18)  | -56.0(5)  | C(12)-P(1)-C(28)-C(29)  | -155.7(4)  |
| Rh(1)-P(2)-C(16)-C(18)  | 165.6(4)  | C(24)-P(1)-C(28)-C(29)  | 94.5(4)    |
| C(2)-P(2)-C(16)-C(19)   | -59.5(4)  | Rh(1)-P(1)-C(28)-C(29)  | -42.8(4)   |
| C(20)-P(2)-C(16)-C(19)  | -175.0(4) | Cl(3B)-Rh(2)-P(3)-C(33) | 178.8(7)   |
| Rh(1)-P(2)-C(16)-C(19)  | 46.6(4)   | O(2)-Rh(2)-P(3)-C(33)   | 3.72(19)   |
| C(2)-P(2)-C(16)-C(17)   | -175.8(4) | P(4)-Rh(2)-P(3)-C(33)   | 55.8(2)    |
| C(20)-P(2)-C(16)-C(17)  | 68.7(4)   | Cl(2A)-Rh(2)-P(3)-C(33) | -91.07(17) |



|                            |            |                         |           |
|----------------------------|------------|-------------------------|-----------|
| Cl(3B)-Rh(2)-P(3)-C(47)    | 69.3(7)    | C(44)-O(2)-C(32)-C(33)  | -150.9(5) |
| O(2)-Rh(2)-P(3)-C(47)      | -105.8(2)  | Rh(2)-O(2)-C(32)-C(33)  | -3.2(6)   |
| P(4)-Rh(2)-P(3)-C(47)      | -53.7(2)   | C(44)-O(2)-C(32)-C(37)  | 32.3(6)   |
| Cl(2A)-Rh(2)-P(3)-C(47)    | 159.46(19) | Rh(2)-O(2)-C(32)-C(37)  | -180.0(3) |
| Cl(3B)-Rh(2)-P(3)-C(51)    | -66.1(8)   | O(2)-C(32)-C(33)-C(34)  | -175.7(4) |
| O(2)-Rh(2)-P(3)-C(51)      | 118.8(2)   | C(37)-C(32)-C(33)-C(34) | 0.9(7)    |
| P(4)-Rh(2)-P(3)-C(51)      | 170.9(2)   | O(2)-C(32)-C(33)-P(3)   | 7.4(6)    |
| Cl(2A)-Rh(2)-P(3)-C(51)    | 24.1(2)    | C(37)-C(32)-C(33)-P(3)  | -176.0(4) |
| Cl(3B)-Rh(2)-P(4)-C(43)    | -162.6(8)  | C(47)-P(3)-C(33)-C(32)  | 110.4(4)  |
| O(2)-Rh(2)-P(4)-C(43)      | 13.1(2)    | C(51)-P(3)-C(33)-C(32)  | -132.2(4) |
| P(3)-Rh(2)-P(4)-C(43)      | -39.2(2)   | Rh(2)-P(3)-C(33)-C(32)  | -7.2(4)   |
| Cl(2A)-Rh(2)-P(4)-C(43)    | 107.17(18) | C(47)-P(3)-C(33)-C(34)  | -66.3(5)  |
| Cl(3B)-Rh(2)-P(4)-C(55)    | -49.0(8)   | C(51)-P(3)-C(33)-C(34)  | 51.1(5)   |
| O(2)-Rh(2)-P(4)-C(55)      | 126.8(2)   | Rh(2)-P(3)-C(33)-C(34)  | 176.1(4)  |
| P(3)-Rh(2)-P(4)-C(55)      | 74.4(3)    | C(32)-C(33)-C(34)-C(35) | -0.6(8)   |
| Cl(2A)-Rh(2)-P(4)-C(55)    | -139.2(2)  | P(3)-C(33)-C(34)-C(35)  | 176.3(4)  |
| Cl(3B)-Rh(2)-P(4)-C(59)    | 87.9(8)    | C(33)-C(34)-C(35)-C(36) | -1.0(8)   |
| O(2)-Rh(2)-P(4)-C(59)      | -96.4(2)   | C(34)-C(35)-C(36)-C(37) | 2.3(8)    |
| P(3)-Rh(2)-P(4)-C(59)      | -148.7(2)  | C(35)-C(36)-C(37)-C(32) | -1.9(7)   |
| Cl(2A)-Rh(2)-P(4)-C(59)    | -2.4(2)    | C(35)-C(36)-C(37)-C(38) | 174.1(5)  |
| O(2)-Rh(2)-Cl(3B)-C(63B)   | -148(8)    | C(33)-C(32)-C(37)-C(36) | 0.4(7)    |
| P(3)-Rh(2)-Cl(3B)-C(63B)   | 110(2)     | O(2)-C(32)-C(37)-C(36)  | 177.0(4)  |
| P(4)-Rh(2)-Cl(3B)-C(63B)   | -90(2)     | C(33)-C(32)-C(37)-C(38) | -175.8(5) |
| Cl(2A)-Rh(2)-Cl(3B)-C(63B) | 12(2)      | O(2)-C(32)-C(37)-C(38)  | 0.8(7)    |
| Cl(3B)-Rh(2)-O(2)-C(44)    | 44(9)      | C(36)-C(37)-C(38)-C(45) | 25.2(7)   |
| P(3)-Rh(2)-O(2)-C(44)      | 146.9(3)   | C(32)-C(37)-C(38)-C(45) | -158.7(5) |
| P(4)-Rh(2)-O(2)-C(44)      | -14.2(3)   | C(36)-C(37)-C(38)-C(39) | 150.3(5)  |
| Cl(2A)-Rh(2)-O(2)-C(44)    | -115.8(3)  | C(32)-C(37)-C(38)-C(39) | -33.7(6)  |
| Cl(3B)-Rh(2)-O(2)-C(32)    | -104(9)    | C(36)-C(37)-C(38)-C(46) | -94.1(6)  |
| P(3)-Rh(2)-O(2)-C(32)      | -1.2(3)    | C(32)-C(37)-C(38)-C(46) | 81.9(6)   |
| P(4)-Rh(2)-O(2)-C(32)      | -162.3(3)  | C(45)-C(38)-C(39)-C(40) | -25.3(7)  |
| Cl(2A)-Rh(2)-O(2)-C(32)    | 96.1(3)    | C(37)-C(38)-C(39)-C(40) | -149.8(5) |

|                         |           |                        |           |
|-------------------------|-----------|------------------------|-----------|
| C(46)-C(38)-C(39)-C(40) | 93.4(6)   | C(51)-P(3)-C(47)-C(50) | -161.8(4) |
| C(45)-C(38)-C(39)-C(44) | 162.5(5)  | Rh(2)-P(3)-C(47)-C(50) | 59.3(4)   |
| C(37)-C(38)-C(39)-C(44) | 38.0(6)   | C(33)-P(3)-C(47)-C(48) | -166.1(4) |
| C(46)-C(38)-C(39)-C(44) | -78.8(6)  | C(51)-P(3)-C(47)-C(48) | 80.5(4)   |
| C(44)-C(39)-C(40)-C(41) | 1.6(8)    | Rh(2)-P(3)-C(47)-C(48) | -58.4(4)  |
| C(38)-C(39)-C(40)-C(41) | -170.6(5) | C(33)-P(3)-C(51)-C(54) | 41.8(5)   |
| C(39)-C(40)-C(41)-C(42) | 3.6(10)   | C(47)-P(3)-C(51)-C(54) | 153.4(4)  |
| C(40)-C(41)-C(42)-C(43) | -4.5(10)  | Rh(2)-P(3)-C(51)-C(54) | -70.3(4)  |
| C(41)-C(42)-C(43)-C(44) | 0.1(9)    | C(33)-P(3)-C(51)-C(52) | 161.4(4)  |
| C(41)-C(42)-C(43)-P(4)  | 175.9(5)  | C(47)-P(3)-C(51)-C(52) | -87.0(4)  |
| C(55)-P(4)-C(43)-C(42)  | 47.8(5)   | Rh(2)-P(3)-C(51)-C(52) | 49.3(4)   |
| C(59)-P(4)-C(43)-C(42)  | -69.5(5)  | C(33)-P(3)-C(51)-C(53) | -79.9(5)  |
| Rh(2)-P(4)-C(43)-C(42)  | 169.2(5)  | C(47)-P(3)-C(51)-C(53) | 31.7(5)   |
| C(55)-P(4)-C(43)-C(44)  | -136.5(4) | Rh(2)-P(3)-C(51)-C(53) | 168.0(4)  |
| C(59)-P(4)-C(43)-C(44)  | 106.3(4)  | C(43)-P(4)-C(55)-C(57) | -82.8(5)  |
| Rh(2)-P(4)-C(43)-C(44)  | -15.0(4)  | C(59)-P(4)-C(55)-C(57) | 27.4(6)   |
| C(42)-C(43)-C(44)-C(39) | 5.4(8)    | Rh(2)-P(4)-C(55)-C(57) | 166.5(4)  |
| P(4)-C(43)-C(44)-C(39)  | -170.6(4) | C(43)-P(4)-C(55)-C(58) | 40.6(5)   |
| C(42)-C(43)-C(44)-O(2)  | -178.6(5) | C(59)-P(4)-C(55)-C(58) | 150.8(4)  |
| P(4)-C(43)-C(44)-O(2)   | 5.4(6)    | Rh(2)-P(4)-C(55)-C(58) | -70.1(5)  |
| C(40)-C(39)-C(44)-C(43) | -6.3(8)   | C(43)-P(4)-C(55)-C(56) | 156.3(4)  |
| C(38)-C(39)-C(44)-C(43) | 166.4(5)  | C(59)-P(4)-C(55)-C(56) | -93.4(4)  |
| C(40)-C(39)-C(44)-O(2)  | 177.8(5)  | Rh(2)-P(4)-C(55)-C(56) | 45.7(5)   |
| C(38)-C(39)-C(44)-O(2)  | -9.5(7)   | C(43)-P(4)-C(59)-C(61) | 65.3(6)   |
| C(32)-O(2)-C(44)-C(43)  | 155.9(4)  | C(55)-P(4)-C(59)-C(61) | -47.3(6)  |
| Rh(2)-O(2)-C(44)-C(43)  | 8.5(6)    | Rh(2)-P(4)-C(59)-C(61) | 174.0(5)  |
| C(32)-O(2)-C(44)-C(39)  | -28.0(6)  | C(43)-P(4)-C(59)-C(62) | -53.1(5)  |
| Rh(2)-O(2)-C(44)-C(39)  | -175.4(3) | C(55)-P(4)-C(59)-C(62) | -165.7(4) |
| C(33)-P(3)-C(47)-C(49)  | 71.7(5)   | Rh(2)-P(4)-C(59)-C(62) | 55.7(4)   |
| C(51)-P(3)-C(47)-C(49)  | -41.7(5)  | C(43)-P(4)-C(59)-C(60) | -170.4(4) |
| Rh(2)-P(3)-C(47)-C(49)  | 179.3(4)  | C(55)-P(4)-C(59)-C(60) | 77.0(5)   |
| C(33)-P(3)-C(47)-C(50)  | -48.4(4)  | Rh(2)-P(4)-C(59)-C(60) | -61.6(4)  |



Figure E1: ORTEP diagram of [*trans*-(<sup>t</sup>Bu<sub>xan</sub>POP)Rh(H)<sub>2</sub>(OH<sub>2</sub>)]SbF<sub>6</sub>

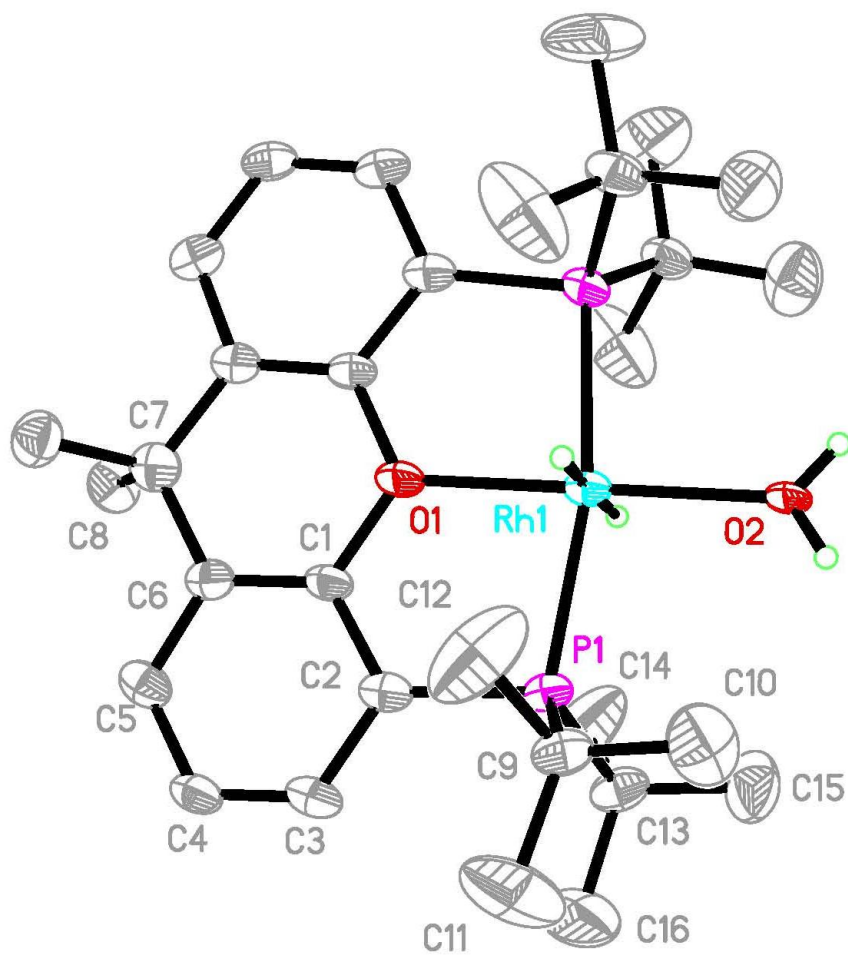

Table E2. Crystal data and structure refinement for [*trans*-(<sup>t</sup>Bu<sub>3</sub>xanPOP)Rh(H)<sub>2</sub>(OH<sub>2</sub>)]SbF<sub>6</sub>.

|                                   |                                                                                    |                  |
|-----------------------------------|------------------------------------------------------------------------------------|------------------|
| Identification code               | mh311_c2                                                                           |                  |
| Empirical formula                 | C <sub>37</sub> H <sub>58</sub> F <sub>6</sub> O <sub>2</sub> P <sub>2</sub> Rh Sb |                  |
| Formula weight                    | 935.43                                                                             |                  |
| Temperature                       | 100(2) K                                                                           |                  |
| Wavelength                        | 0.71073 Å                                                                          |                  |
| Crystal system                    | Monoclinic                                                                         |                  |
| Space group                       | C2                                                                                 |                  |
| Unit cell dimensions              | a = 19.017(3) Å                                                                    | α = 90°.         |
|                                   | b = 11.5983(17) Å                                                                  | β = 126.613(2)°. |
|                                   | c = 11.3433(16) Å                                                                  | γ = 90°.         |
| Volume                            | 2008.3(5) Å <sup>3</sup>                                                           |                  |
| Z                                 | 2                                                                                  |                  |
| Density (calculated)              | 1.547 Mg/m <sup>3</sup>                                                            |                  |
| Absorption coefficient            | 1.222 mm <sup>-1</sup>                                                             |                  |
| F(000)                            | 952                                                                                |                  |
| Crystal size                      | 0.24 x 0.13 x 0.03 mm <sup>3</sup>                                                 |                  |
| Theta range for data collection   | 2.21 to 30.02°.                                                                    |                  |
| Index ranges                      | -26 ≤ h ≤ 26, -16 ≤ k ≤ 16, -15 ≤ l ≤ 15                                           |                  |
| Reflections collected             | 11611                                                                              |                  |
| Independent reflections           | 5622 [R(int) = 0.0384]                                                             |                  |
| Completeness to theta = 30.02°    | 99.9 %                                                                             |                  |
| Absorption correction             | Semi-empirical from equivalents                                                    |                  |
| Max. and min. transmission        | 0.7462 and 0.6352                                                                  |                  |
| Refinement method                 | Full-matrix least-squares on F <sup>2</sup>                                        |                  |
| Data / restraints / parameters    | 5622 / 350 / 238                                                                   |                  |
| Goodness-of-fit on F <sup>2</sup> | 1.015                                                                              |                  |
| Final R indices [I > 2σ(I)]       | R1 = 0.0562, wR2 = 0.1293                                                          |                  |
| R indices (all data)              | R1 = 0.0693, wR2 = 0.1379                                                          |                  |
| Absolute structure parameter      | 0.04(4)                                                                            |                  |
| Largest diff. peak and hole       | 1.527 and -0.479 e.Å <sup>-3</sup>                                                 |                  |

Table E3. Atomic coordinates ( $\times 10^4$ ) and equivalent isotropic displacement parameters ( $\text{\AA}^2 \times 10^3$ ) for  $[\textit{trans}\text{-}(\textit{tBu}\text{-xanPOP})\text{Rh}(\text{H})_2(\text{OH}_2)]\text{SbF}_6$ .  $U(\text{eq})$  is defined as one third of the trace of the orthogonalized  $U^{ij}$  tensor.

|       | x        | y         | z         | U(eq)  |
|-------|----------|-----------|-----------|--------|
| Rh(1) | 0        | -4(1)     | 0         | 24(1)  |
| P(1)  | -1501(1) | 195(1)    | -1501(2)  | 26(1)  |
| O(1)  | 0        | 1847(5)   | 0         | 27(1)  |
| O(2)  | 0        | -1920(5)  | 0         | 32(1)  |
| C(1)  | -800(3)  | 2450(5)   | -800(5)   | 25(1)  |
| C(2)  | -1576(3) | 1767(6)   | -1576(6)  | 28(1)  |
| C(3)  | -2375(3) | 2366(6)   | -2377(6)  | 30(1)  |
| C(4)  | -2414(4) | 3541(8)   | -2417(8)  | 30(1)  |
| C(5)  | -1640(4) | 4190(6)   | -1638(6)  | 30(1)  |
| C(6)  | -830(4)  | 3654(5)   | -823(6)   | 27(1)  |
| C(7)  | 0        | 4359(9)   | 0         | 36(2)  |
| C(8)  | 3(5)     | 5189(7)   | -1095(8)  | 38(2)  |
| C(9)  | -2045(4) | -298(5)   | -642(6)   | 31(1)  |
| C(10) | -1937(6) | -1569(7)  | -401(11)  | 59(2)  |
| C(11) | -3009(5) | 5(10)     | -1473(11) | 76(3)  |
| C(12) | -1526(7) | 315(10)   | 859(9)    | 80(3)  |
| C(13) | -2045(4) | -298(6)   | -3447(6)  | 33(1)  |
| C(14) | -1521(7) | 303(10)   | -3892(10) | 80(3)  |
| C(15) | -1939(6) | -1572(7)  | -3479(9)  | 61(2)  |
| C(16) | -3001(5) | 7(10)     | -4542(8)  | 77(3)  |
| Sb(1) | 0        | 2290(1)   | 5000      | 46(1)  |
| F(1)  | -1202(3) | 2271(9)   | 3809(8)   | 122(3) |
| F(2)  | 4(6)     | 1252(12)  | 3816(12)  | 203(5) |
| F(3)  | -9(9)    | 3339(13)  | 3795(17)  | 271(8) |
| C(21) | 1(5)     | -1650(8)  | -4402(10) | 59(2)  |
| C(22) | 1(4)     | -2671(12) | -3767(8)  | 53(2)  |
| C(23) | 2(5)     | -3707(8)  | -4399(9)  | 52(2)  |

Table E4. Bond lengths [ $\text{\AA}$ ] and angles [ $^\circ$ ] for  $[\textit{trans}\text{-}(\textit{tBu}\text{xanPOP})\text{Rh}(\text{H})_2(\text{OH}_2)]\text{SbF}_6$ .

|              |            |               |           |
|--------------|------------|---------------|-----------|
| Rh(1)-O(1)   | 2.147(6)   | C(10)-H(10C)  | 0.9600    |
| Rh(1)-O(2)   | 2.223(6)   | C(11)-H(11A)  | 0.9600    |
| Rh(1)-P(1)#1 | 2.3032(14) | C(11)-H(11B)  | 0.9600    |
| Rh(1)-P(1)   | 2.3032(14) | C(11)-H(11C)  | 0.9600    |
| Rh(1)-H(1)   | 1.556(19)  | C(12)-H(12A)  | 0.9600    |
| P(1)-C(2)    | 1.827(6)   | C(12)-H(12B)  | 0.9600    |
| P(1)-C(9)    | 1.883(6)   | C(12)-H(12C)  | 0.9600    |
| P(1)-C(13)   | 1.883(5)   | C(13)-C(15)   | 1.494(10) |
| O(1)-C(1)#1  | 1.407(6)   | C(13)-C(16)   | 1.510(9)  |
| O(1)-C(1)    | 1.407(6)   | C(13)-C(14)   | 1.528(10) |
| O(2)-H(2)    | 0.838(10)  | C(14)-H(14A)  | 0.9600    |
| C(1)-C(6)    | 1.397(8)   | C(14)-H(14B)  | 0.9600    |
| C(1)-C(2)    | 1.424(7)   | C(14)-H(14C)  | 0.9600    |
| C(2)-C(3)    | 1.403(7)   | C(15)-H(15A)  | 0.9600    |
| C(3)-C(4)    | 1.364(11)  | C(15)-H(15B)  | 0.9600    |
| C(3)-H(3)    | 0.9300     | C(15)-H(15C)  | 0.9600    |
| C(4)-C(5)    | 1.401(10)  | C(16)-H(16A)  | 0.9600    |
| C(4)-H(4)    | 0.9300     | C(16)-H(16B)  | 0.9600    |
| C(5)-C(6)    | 1.385(8)   | C(16)-H(16C)  | 0.9600    |
| C(5)-H(5)    | 0.9300     | Sb(1)-F(2)    | 1.806(7)  |
| C(6)-C(7)    | 1.508(8)   | Sb(1)-F(2)#2  | 1.806(7)  |
| C(7)-C(6)#1  | 1.508(8)   | Sb(1)-F(3)#2  | 1.823(9)  |
| C(7)-C(8)#1  | 1.574(9)   | Sb(1)-F(3)    | 1.823(9)  |
| C(7)-C(8)    | 1.574(9)   | Sb(1)-F(1)    | 1.835(5)  |
| C(8)-H(8A)   | 0.9600     | Sb(1)-F(1)#2  | 1.835(5)  |
| C(8)-H(8B)   | 0.9600     | C(21)-C(21)#3 | 1.355(19) |
| C(8)-H(8C)   | 0.9600     | C(21)-C(22)   | 1.386(15) |
| C(9)-C(10)   | 1.491(10)  | C(21)-H(21)   | 0.9300    |
| C(9)-C(11)   | 1.521(9)   | C(22)-C(23)   | 1.400(14) |
| C(9)-C(12)   | 1.541(10)  | C(22)-H(22)   | 0.9300    |
| C(10)-H(10A) | 0.9600     | C(23)-C(23)#3 | 1.359(17) |
| C(10)-H(10B) | 0.9600     | C(23)-H(23)   | 0.9300    |

|                   |            |                     |          |
|-------------------|------------|---------------------|----------|
| O(1)-Rh(1)-O(2)   | 180.0      | C(6)-C(5)-H(5)      | 119.6    |
| O(1)-Rh(1)-P(1)#1 | 84.25(4)   | C(4)-C(5)-H(5)      | 119.6    |
| O(2)-Rh(1)-P(1)#1 | 95.75(4)   | C(5)-C(6)-C(1)      | 118.6(5) |
| O(1)-Rh(1)-P(1)   | 84.25(4)   | C(5)-C(6)-C(7)      | 120.5(6) |
| O(2)-Rh(1)-P(1)   | 95.75(4)   | C(1)-C(6)-C(7)      | 121.0(5) |
| P(1)#1-Rh(1)-P(1) | 168.51(9)  | C(6)#1-C(7)-C(6)    | 114.3(8) |
| O(1)-Rh(1)-H(1)   | 91.4(3)    | C(6)#1-C(7)-C(8)#1  | 109.8(4) |
| O(2)-Rh(1)-H(1)   | 88.6(3)    | C(6)-C(7)-C(8)#1    | 109.0(4) |
| P(1)#1-Rh(1)-H(1) | 90.5(4)    | C(6)#1-C(7)-C(8)    | 109.0(4) |
| P(1)-Rh(1)-H(1)   | 89.8(4)    | C(6)-C(7)-C(8)      | 109.8(4) |
| C(2)-P(1)-C(9)    | 106.0(3)   | C(8)#1-C(7)-C(8)    | 104.6(8) |
| C(2)-P(1)-C(13)   | 106.0(3)   | C(7)-C(8)-H(8A)     | 109.5    |
| C(9)-P(1)-C(13)   | 115.3(3)   | C(7)-C(8)-H(8B)     | 109.5    |
| C(2)-P(1)-Rh(1)   | 99.30(18)  | H(8A)-C(8)-H(8B)    | 109.5    |
| C(9)-P(1)-Rh(1)   | 114.08(19) | C(7)-C(8)-H(8C)     | 109.5    |
| C(13)-P(1)-Rh(1)  | 114.08(19) | H(8A)-C(8)-H(8C)    | 109.5    |
| C(1)#1-O(1)-C(1)  | 120.5(6)   | H(8B)-C(8)-H(8C)    | 109.5    |
| C(1)#1-O(1)-Rh(1) | 119.8(3)   | C(10)-C(9)-C(11)    | 109.0(7) |
| C(1)-O(1)-Rh(1)   | 119.8(3)   | C(10)-C(9)-C(12)    | 109.0(7) |
| Rh(1)-O(2)-H(2)   | 125.1(12)  | C(11)-C(9)-C(12)    | 108.6(7) |
| C(6)-C(1)-O(1)    | 121.6(5)   | C(10)-C(9)-P(1)     | 109.7(5) |
| C(6)-C(1)-C(2)    | 121.9(5)   | C(11)-C(9)-P(1)     | 116.1(4) |
| O(1)-C(1)-C(2)    | 116.5(5)   | C(12)-C(9)-P(1)     | 104.2(4) |
| C(3)-C(2)-C(1)    | 116.6(6)   | C(9)-C(10)-H(10A)   | 109.5    |
| C(3)-C(2)-P(1)    | 123.2(5)   | C(9)-C(10)-H(10B)   | 109.5    |
| C(1)-C(2)-P(1)    | 120.2(4)   | H(10A)-C(10)-H(10B) | 109.5    |
| C(4)-C(3)-C(2)    | 122.2(6)   | C(9)-C(10)-H(10C)   | 109.5    |
| C(4)-C(3)-H(3)    | 118.9      | H(10A)-C(10)-H(10C) | 109.5    |
| C(2)-C(3)-H(3)    | 118.9      | H(10B)-C(10)-H(10C) | 109.5    |
| C(3)-C(4)-C(5)    | 120.0(6)   | C(9)-C(11)-H(11A)   | 109.5    |
| C(3)-C(4)-H(4)    | 120.0      | C(9)-C(11)-H(11B)   | 109.5    |
| C(5)-C(4)-H(4)    | 120.0      | H(11A)-C(11)-H(11B) | 109.5    |
| C(6)-C(5)-C(4)    | 120.8(6)   | C(9)-C(11)-H(11C)   | 109.5    |



|                     |          |                     |          |
|---------------------|----------|---------------------|----------|
| H(11A)-C(11)-H(11C) | 109.5    | H(16A)-C(16)-H(16B) | 109.5    |
| H(11B)-C(11)-H(11C) | 109.5    | C(13)-C(16)-H(16C)  | 109.5    |
| C(9)-C(12)-H(12A)   | 109.5    | H(16A)-C(16)-H(16C) | 109.5    |
| C(9)-C(12)-H(12B)   | 109.5    | H(16B)-C(16)-H(16C) | 109.5    |
| H(12A)-C(12)-H(12B) | 109.5    | F(2)-Sb(1)-F(2)#2   | 96.5(10) |
| C(9)-C(12)-H(12C)   | 109.5    | F(2)-Sb(1)-F(3)#2   | 179.4(6) |
| H(12A)-C(12)-H(12C) | 109.5    | F(2)#2-Sb(1)-F(3)#2 | 83.6(6)  |
| H(12B)-C(12)-H(12C) | 109.5    | F(2)-Sb(1)-F(3)     | 83.6(6)  |
| C(15)-C(13)-C(16)   | 109.0(7) | F(2)#2-Sb(1)-F(3)   | 179.4(6) |
| C(15)-C(13)-C(14)   | 108.7(7) | F(3)#2-Sb(1)-F(3)   | 96.3(12) |
| C(16)-C(13)-C(14)   | 108.9(8) | F(2)-Sb(1)-F(1)     | 90.0(4)  |
| C(15)-C(13)-P(1)    | 109.9(5) | F(2)#2-Sb(1)-F(1)   | 89.1(4)  |
| C(16)-C(13)-P(1)    | 116.3(5) | F(3)#2-Sb(1)-F(1)   | 90.6(6)  |
| C(14)-C(13)-P(1)    | 103.8(4) | F(3)-Sb(1)-F(1)     | 90.3(5)  |
| C(13)-C(14)-H(14A)  | 109.5    | F(2)-Sb(1)-F(1)#2   | 89.1(4)  |
| C(13)-C(14)-H(14B)  | 109.5    | F(2)#2-Sb(1)-F(1)#2 | 90.0(4)  |
| H(14A)-C(14)-H(14B) | 109.5    | F(3)#2-Sb(1)-F(1)#2 | 90.3(5)  |
| C(13)-C(14)-H(14C)  | 109.5    | F(3)-Sb(1)-F(1)#2   | 90.6(6)  |
| H(14A)-C(14)-H(14C) | 109.5    | F(1)-Sb(1)-F(1)#2   | 178.7(7) |
| H(14B)-C(14)-H(14C) | 109.5    | C(21)#3-C(21)-C(22) | 121.3(5) |
| C(13)-C(15)-H(15A)  | 109.5    | C(21)#3-C(21)-H(21) | 119.3    |
| C(13)-C(15)-H(15B)  | 109.5    | C(22)-C(21)-H(21)   | 119.3    |
| H(15A)-C(15)-H(15B) | 109.5    | C(21)-C(22)-C(23)   | 117.8(7) |
| C(13)-C(15)-H(15C)  | 109.5    | C(21)-C(22)-H(22)   | 121.1    |
| H(15A)-C(15)-H(15C) | 109.5    | C(23)-C(22)-H(22)   | 121.1    |
| H(15B)-C(15)-H(15C) | 109.5    | C(23)#3-C(23)-C(22) | 120.9(5) |
| C(13)-C(16)-H(16A)  | 109.5    | C(23)#3-C(23)-H(23) | 119.6    |
| C(13)-C(16)-H(16B)  | 109.5    | C(22)-C(23)-H(23)   | 119.6    |

---

Symmetry transformations used to generate equivalent atoms:

#1 -x,y,-z #2 -x,y,-z+1 #3 -x,y,-z-1

Table E5. Anisotropic displacement parameters ( $\text{\AA}^2 \times 10^3$ ) for  $[\text{trans}-(\text{t}^{\text{Bu}}\text{xanPOP})\text{Rh}(\text{H})_2(\text{OH}_2)]\text{SbF}_6$ . The anisotropic displacement factor exponent takes the form:  $-2\pi^2[ h^2 a^{*2}U^{11} + \dots + 2 h k a^* b^* U^{12} ]$

|       | U <sup>11</sup> | U <sup>22</sup> | U <sup>33</sup> | U <sup>23</sup> | U <sup>13</sup> | U <sup>12</sup> |
|-------|-----------------|-----------------|-----------------|-----------------|-----------------|-----------------|
| Rh(1) | 15(1)           | 29(1)           | 24(1)           | 0               | 9(1)            | 0               |
| P(1)  | 18(1)           | 30(1)           | 25(1)           | -2(1)           | 10(1)           | -4(1)           |
| O(1)  | 14(2)           | 31(3)           | 31(3)           | 0               | 11(2)           | 0               |
| O(2)  | 9(2)            | 27(3)           | 43(4)           | 0               | 7(3)            | 0               |
| C(1)  | 15(2)           | 32(3)           | 24(2)           | 0(2)            | 10(2)           | 2(2)            |
| C(2)  | 19(2)           | 38(3)           | 23(2)           | 1(2)            | 11(2)           | 1(2)            |
| C(3)  | 20(2)           | 43(3)           | 25(2)           | 4(2)            | 12(2)           | 6(2)            |
| C(4)  | 19(3)           | 41(3)           | 26(3)           | 0(2)            | 12(2)           | 6(2)            |
| C(5)  | 28(3)           | 40(3)           | 26(3)           | 4(2)            | 18(2)           | 8(2)            |
| C(6)  | 22(2)           | 33(3)           | 23(2)           | -1(2)           | 12(2)           | -1(2)           |
| C(7)  | 32(4)           | 35(5)           | 37(5)           | 0               | 18(4)           | 0               |
| C(8)  | 41(3)           | 37(4)           | 40(3)           | 6(3)            | 26(3)           | 3(3)            |
| C(9)  | 24(2)           | 40(3)           | 29(3)           | -1(2)           | 15(2)           | -7(2)           |
| C(10) | 66(5)           | 52(4)           | 82(6)           | 14(4)           | 57(5)           | 3(4)            |
| C(11) | 45(4)           | 111(7)          | 96(6)           | 46(6)           | 55(4)           | 21(5)           |
| C(12) | 113(7)          | 94(7)           | 49(4)           | -27(4)          | 57(5)           | -54(6)          |
| C(13) | 29(3)           | 46(3)           | 21(2)           | -7(2)           | 13(2)           | -8(2)           |
| C(14) | 113(7)          | 97(7)           | 67(5)           | -46(5)          | 73(5)           | -59(6)          |
| C(15) | 76(6)           | 41(4)           | 38(4)           | -9(3)           | 20(4)           | 4(4)            |
| C(16) | 47(4)           | 109(7)          | 32(3)           | -27(5)          | 1(3)            | 18(5)           |
| Sb(1) | 31(1)           | 30(1)           | 62(1)           | 0               | 18(1)           | 0               |
| F(1)  | 50(3)           | 172(8)          | 113(5)          | 14(6)           | 32(3)           | 31(5)           |
| F(2)  | 79(6)           | 307(11)         | 178(9)          | -134(8)         | 53(6)           | -2(7)           |
| F(3)  | 210(12)         | 296(13)         | 275(13)         | 149(10)         | 127(10)         | -23(9)          |
| C(21) | 35(4)           | 63(5)           | 60(5)           | -29(4)          | 18(4)           | -1(3)           |
| C(22) | 28(3)           | 87(6)           | 37(3)           | -8(4)           | 16(3)           | -3(4)           |
| C(23) | 21(3)           | 70(5)           | 49(4)           | 7(3)            | 11(3)           | -6(3)           |

Table E6. Hydrogen coordinates ( $\times 10^4$ ) and isotropic displacement parameters ( $\text{\AA}^2 \times 10^{-3}$ ) for  $[\textit{trans}\text{-}(\textit{tBu}\text{-xanPOP})\text{Rh}(\text{H})_2(\text{OH}_2)]\text{SbF}_6$ .

|        | x       | y         | z        | U(eq) |
|--------|---------|-----------|----------|-------|
| H(1)   | -7(7)   | -36(7)    | 1365(18) | 36    |
| H(2)   | 434(13) | -2336(17) | 280(70)  | 47    |
| H(3)   | -2894   | 1947      | -2899    | 37    |
| H(4)   | -2955   | 3911      | -2960    | 36    |
| H(5)   | -1671   | 4991      | -1669    | 36    |
| H(8A)  | 2       | 4740      | -1807    | 57    |
| H(8B)  | 518     | 5664      | -559     | 57    |
| H(8C)  | -509    | 5669      | -1587    | 57    |
| H(10A) | -2027   | -1780     | 318      | 88    |
| H(10B) | -1356   | -1786     | -57      | 88    |
| H(10C) | -2358   | -1959     | -1308    | 88    |
| H(11A) | -3337   | -344      | -2429    | 114   |
| H(11B) | -3079   | 827       | -1574    | 114   |
| H(11C) | -3220   | -277      | -940     | 114   |
| H(12A) | -1924   | 583       | 1056     | 120   |
| H(12B) | -1215   | 958       | 843      | 120   |
| H(12C) | -1117   | -216      | 1613     | 120   |
| H(14A) | -1107   | -229      | -3812    | 120   |
| H(14B) | -1213   | 950       | -3256    | 120   |
| H(14C) | -1912   | 567       | -4888    | 120   |
| H(15A) | -2321   | -1961     | -3318    | 91    |
| H(15B) | -1343   | -1782     | -2721    | 91    |
| H(15C) | -2087   | -1790     | -4418    | 91    |
| H(16A) | -3210   | -274      | -5496    | 115   |
| H(16B) | -3070   | 829       | -4579    | 115   |
| H(16C) | -3332   | -342      | -4248    | 115   |
| H(21)  | 2       | -951      | -3999    | 71    |
| H(22)  | 0       | -2668     | -2948    | 63    |
| H(23)  | 5       | -4404     | -3992    | 63    |

Table E7. Torsion angles [°] for *[trans-(<sup>t</sup>Bu<sub>xan</sub>POP)Rh(H)<sub>2</sub>(OH<sub>2</sub>)]SbF<sub>6</sub>*.

|                          |             |                           |           |
|--------------------------|-------------|---------------------------|-----------|
| O(1)-Rh(1)-P(1)-C(2)     | 0.02(17)    | C(4)-C(5)-C(6)-C(7)       | 179.4(5)  |
| O(2)-Rh(1)-P(1)-C(2)     | -179.98(17) | O(1)-C(1)-C(6)-C(5)       | 179.7(4)  |
| P(1)#1-Rh(1)-P(1)-C(2)   | 0.02(17)    | C(2)-C(1)-C(6)-C(5)       | -0.6(8)   |
| O(1)-Rh(1)-P(1)-C(9)     | -112.3(2)   | O(1)-C(1)-C(6)-C(7)       | 0.7(7)    |
| O(2)-Rh(1)-P(1)-C(9)     | 67.7(2)     | C(2)-C(1)-C(6)-C(7)       | -179.6(4) |
| P(1)#1-Rh(1)-P(1)-C(9)   | -112.3(2)   | C(5)-C(6)-C(7)-C(6)#1     | -179.4(6) |
| O(1)-Rh(1)-P(1)-C(13)    | 112.3(2)    | C(1)-C(6)-C(7)-C(6)#1     | -0.4(3)   |
| O(2)-Rh(1)-P(1)-C(13)    | -67.7(2)    | C(5)-C(6)-C(7)-C(8)#1     | 57.4(7)   |
| P(1)#1-Rh(1)-P(1)-C(13)  | 112.3(2)    | C(1)-C(6)-C(7)-C(8)#1     | -123.6(6) |
| O(2)-Rh(1)-O(1)-C(1)#1   | 0(76)       | C(5)-C(6)-C(7)-C(8)       | -56.6(7)  |
| P(1)#1-Rh(1)-O(1)-C(1)#1 | 0.0(2)      | C(1)-C(6)-C(7)-C(8)       | 122.4(6)  |
| P(1)-Rh(1)-O(1)-C(1)#1   | -180.0(2)   | C(2)-P(1)-C(9)-C(10)      | -174.4(5) |
| O(2)-Rh(1)-O(1)-C(1)     | 0(100)      | C(13)-P(1)-C(9)-C(10)     | 68.6(6)   |
| P(1)#1-Rh(1)-O(1)-C(1)   | -180.0(2)   | Rh(1)-P(1)-C(9)-C(10)     | -66.2(5)  |
| P(1)-Rh(1)-O(1)-C(1)     | 0.0(2)      | C(2)-P(1)-C(9)-C(11)      | 61.4(7)   |
| C(1)#1-O(1)-C(1)-C(6)    | -0.4(4)     | C(13)-P(1)-C(9)-C(11)     | -55.5(7)  |
| Rh(1)-O(1)-C(1)-C(6)     | 179.6(4)    | Rh(1)-P(1)-C(9)-C(11)     | 169.7(6)  |
| C(1)#1-O(1)-C(1)-C(2)    | 180.0(5)    | C(2)-P(1)-C(9)-C(12)      | -57.9(6)  |
| Rh(1)-O(1)-C(1)-C(2)     | 0.0(5)      | C(13)-P(1)-C(9)-C(12)     | -174.8(6) |
| C(6)-C(1)-C(2)-C(3)      | 0.5(8)      | Rh(1)-P(1)-C(9)-C(12)     | 50.4(6)   |
| O(1)-C(1)-C(2)-C(3)      | -179.9(4)   | C(2)-P(1)-C(13)-C(15)     | 174.5(5)  |
| C(6)-C(1)-C(2)-P(1)      | -179.6(4)   | C(9)-P(1)-C(13)-C(15)     | -68.6(6)  |
| O(1)-C(1)-C(2)-P(1)      | 0.1(6)      | Rh(1)-P(1)-C(13)-C(15)    | 66.3(6)   |
| C(9)-P(1)-C(2)-C(3)      | -61.6(5)    | C(2)-P(1)-C(13)-C(16)     | -61.2(7)  |
| C(13)-P(1)-C(2)-C(3)     | 61.4(5)     | C(9)-P(1)-C(13)-C(16)     | 55.8(7)   |
| Rh(1)-P(1)-C(2)-C(3)     | 179.9(4)    | Rh(1)-P(1)-C(13)-C(16)    | -169.4(6) |
| C(9)-P(1)-C(2)-C(1)      | 118.4(4)    | C(2)-P(1)-C(13)-C(14)     | 58.4(6)   |
| C(13)-P(1)-C(2)-C(1)     | -118.5(4)   | C(9)-P(1)-C(13)-C(14)     | 175.4(6)  |
| Rh(1)-P(1)-C(2)-C(1)     | -0.1(4)     | Rh(1)-P(1)-C(13)-C(14)    | -49.8(6)  |
| C(1)-C(2)-C(3)-C(4)      | -0.1(9)     | C(21)#3-C(21)-C(22)-C(23) | 0.2(14)   |
| P(1)-C(2)-C(3)-C(4)      | 180.0(5)    | C(21)-C(22)-C(23)-C(23)#3 | -0.3(12)  |
| C(2)-C(3)-C(4)-C(5)      | -0.1(10)    |                           |           |
| C(3)-C(4)-C(5)-C(6)      | 0.0(9)      |                           |           |
| C(4)-C(5)-C(6)-C(1)      | 0.4(8)      |                           |           |

Symmetry transformations used to generate equivalent atoms: #1 -x,y,-z #2 -x,y,-z+1 #3 -x,y,-z-1

Figure F1: ORTEP diagram of  $[(^t\text{Bu}_2\text{xanPOP})\text{Rh}(\text{H})_2]\text{SbF}_6$

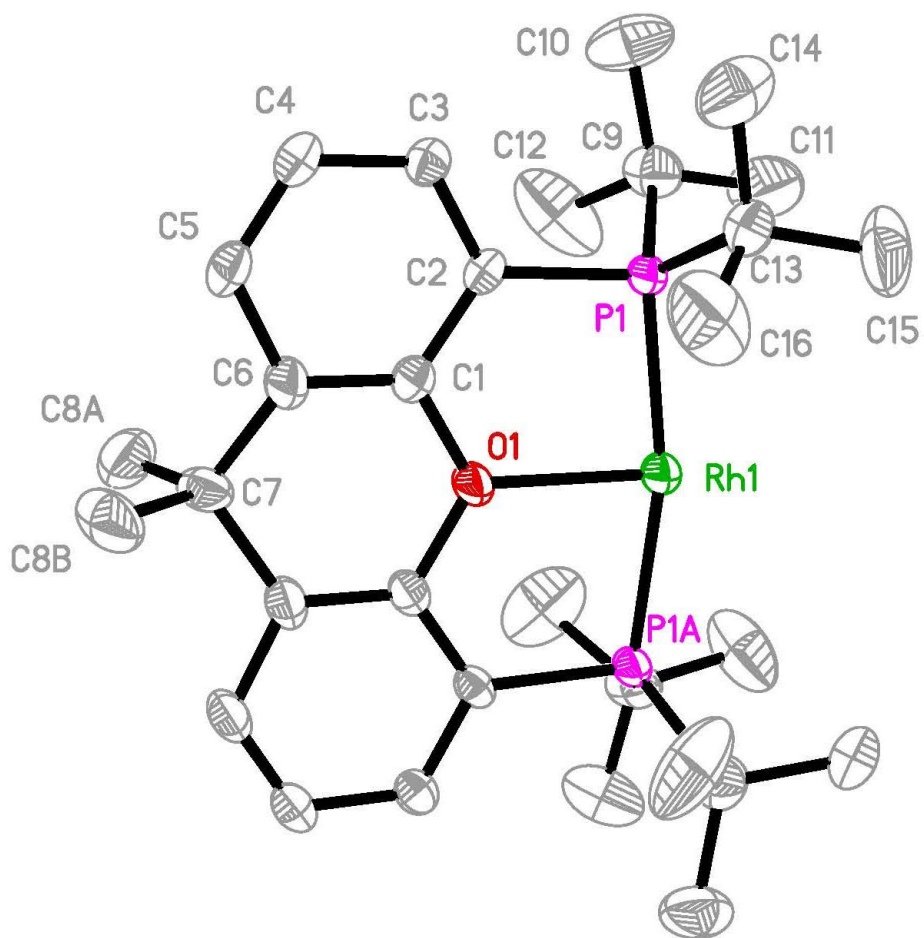

Table F2. Crystal data and structure refinement for [(<sup>t</sup>Bu<sub>3</sub>xanPOP)Rh(H)<sub>2</sub>]SbF<sub>6</sub>.

|                                   |                                                                                                    |                  |
|-----------------------------------|----------------------------------------------------------------------------------------------------|------------------|
| Identification code               | mh315-c2                                                                                           |                  |
| Empirical formula                 | C <sub>32</sub> H <sub>52</sub> Cl <sub>2</sub> F <sub>6</sub> O <sub>2</sub> P <sub>2</sub> Rh Sb |                  |
| Formula weight                    | 924.24                                                                                             |                  |
| Temperature                       | 100(2) K                                                                                           |                  |
| Wavelength                        | 0.71073 Å                                                                                          |                  |
| Crystal system                    | Monoclinic                                                                                         |                  |
| Space group                       | C2                                                                                                 |                  |
| Unit cell dimensions              | a = 19.814(2) Å                                                                                    | α = 90°.         |
|                                   | b = 10.6736(11) Å                                                                                  | β = 124.295(2)°. |
|                                   | c = 11.1660(12) Å                                                                                  | γ = 90°.         |
| Volume                            | 1950.9(4) Å <sup>3</sup>                                                                           |                  |
| Z                                 | 2                                                                                                  |                  |
| Density (calculated)              | 1.573 Mg/m <sup>3</sup>                                                                            |                  |
| Absorption coefficient            | 1.387 mm <sup>-1</sup>                                                                             |                  |
| F(000)                            | 932                                                                                                |                  |
| Crystal size                      | 0.57 x 0.09 x 0.03 mm <sup>3</sup>                                                                 |                  |
| Theta range for data collection   | 2.21 to 31.00°.                                                                                    |                  |
| Index ranges                      | -28 ≤ h ≤ 28, -15 ≤ k ≤ 15, -16 ≤ l ≤ 15                                                           |                  |
| Reflections collected             | 11953                                                                                              |                  |
| Independent reflections           | 5989 [R(int) = 0.0308]                                                                             |                  |
| Completeness to theta = 31.00°    | 99.5 %                                                                                             |                  |
| Absorption correction             | Semi-empirical from equivalents                                                                    |                  |
| Max. and min. transmission        | 0.9596 and 0.5053                                                                                  |                  |
| Refinement method                 | Full-matrix least-squares on F <sup>2</sup>                                                        |                  |
| Data / restraints / parameters    | 5989 / 381 / 253                                                                                   |                  |
| Goodness-of-fit on F <sup>2</sup> | 1.006                                                                                              |                  |
| Final R indices [I > 2σ(I)]       | R1 = 0.0644, wR2 = 0.1513                                                                          |                  |
| R indices (all data)              | R1 = 0.0703, wR2 = 0.1555                                                                          |                  |
| Absolute structure parameter      | -0.04(4)                                                                                           |                  |
| Largest diff. peak and hole       | 1.863 and -1.107 e.Å <sup>-3</sup>                                                                 |                  |

Table F3. Atomic coordinates ( $\times 10^4$ ) and equivalent isotropic displacement parameters ( $\text{\AA}^2 \times 10^3$ ) for  $[(^t\text{Bu}\text{xanPOP})\text{Rh}(\text{H})_2]\text{SbF}_6$ .  $U(\text{eq})$  is defined as one third of the trace of the orthogonalized  $U^{ij}$  tensor.

|       | x        | y         | z        | $U(\text{eq})$ |
|-------|----------|-----------|----------|----------------|
| Rh(1) | 5000     | 0         | 5000     | 25(1)          |
| P(1)  | 6389(1)  | 237(1)    | 6389(2)  | 26(1)          |
| O(1)  | 5000     | 2037(5)   | 5000     | 34(1)          |
| C(1)  | 5744(3)  | 2692(5)   | 5747(6)  | 30(1)          |
| C(2)  | 6453(3)  | 1966(5)   | 6455(6)  | 22(1)          |
| C(3)  | 7192(3)  | 2578(5)   | 7192(5)  | 25(1)          |
| C(4)  | 7231(4)  | 3895(6)   | 7228(7)  | 30(1)          |
| C(5)  | 6530(4)  | 4582(6)   | 6516(8)  | 35(1)          |
| C(6)  | 5755(4)  | 3994(6)   | 5739(9)  | 39(2)          |
| C(7)  | 5000     | 4771(11)  | 4706(10) | 36(3)          |
| C(8A) | 5000     | 5372(18)  | 3490(17) | 55(4)          |
| C(8B) | 5000     | 5870(15)  | 5538(19) | 58(4)          |
| C(9)  | 6898(5)  | -285(6)   | 5481(9)  | 41(2)          |
| C(10) | 7786(5)  | -19(12)   | 6232(10) | 62(2)          |
| C(11) | 6740(6)  | -1647(9)  | 5126(15) | 72(3)          |
| C(12) | 6485(8)  | 437(13)   | 4060(11) | 85(3)          |
| C(13) | 6895(5)  | -292(6)   | 8307(9)  | 41(2)          |
| C(14) | 7787(6)  | -28(12)   | 9340(9)  | 63(2)          |
| C(15) | 6745(7)  | -1654(9)  | 8368(11) | 78(3)          |
| C(16) | 6491(8)  | 468(13)   | 8921(12) | 82(3)          |
| Sb(1) | 5000     | -2338(1)  | 0        | 40(1)          |
| F(1A) | 5003(6)  | -2278(14) | 1617(9)  | 93(3)          |
| F(2A) | 5825(7)  | -3473(10) | 822(15)  | 98(4)          |
| F(3A) | 5817(6)  | -1053(8)  | 819(11)  | 70(2)          |
| F(1B) | 4202(10) | -2620(20) | 355(19)  | 66(4)          |
| F(2B) | 5803(10) | -2590(20) | 1968(18) | 65(4)          |
| F(3B) | 5000     | -910(18)  | 0        | 90(4)          |
| Cl(1) | 4984(9)  | 3272(13)  | 1991(17) | 186(5)         |
| Cl(2) | 5618(12) | 2330(20)  | 510(20)  | 227(6)         |
| C(17) | 5060(40) | 3570(50)  | 560(50)  | 206(12)        |



Table F4. Bond lengths [ $\text{\AA}$ ] and angles [ $^\circ$ ] for  $[(\text{tBu}\text{xanPOP})\text{Rh}(\text{H})_2]\text{SbF}_6$ .

|              |             |               |           |
|--------------|-------------|---------------|-----------|
| Rh(1)-O(1)   | 2.175(6)    | C(9)-C(11)    | 1.492(11) |
| Rh(1)-P(1)#1 | 2.2871(15)  | C(9)-C(12)    | 1.523(13) |
| Rh(1)-P(1)   | 2.2872(15)  | C(10)-H(10A)  | 0.9800    |
| Rh(1)-H(1)   | 1.54469(11) | C(10)-H(10B)  | 0.9800    |
| P(1)-C(2)    | 1.849(5)    | C(10)-H(10C)  | 0.9800    |
| P(1)-C(13)   | 1.869(8)    | C(11)-H(11A)  | 0.9800    |
| P(1)-C(9)    | 1.873(8)    | C(11)-H(11B)  | 0.9800    |
| O(1)-C(1)#1  | 1.405(6)    | C(11)-H(11C)  | 0.9800    |
| O(1)-C(1)    | 1.405(6)    | C(12)-H(12A)  | 0.9800    |
| C(1)-C(6)    | 1.390(8)    | C(12)-H(12B)  | 0.9800    |
| C(1)-C(2)    | 1.395(8)    | C(12)-H(12C)  | 0.9800    |
| C(2)-C(3)    | 1.375(7)    | C(13)-C(14)   | 1.496(12) |
| C(3)-C(4)    | 1.407(8)    | C(13)-C(15)   | 1.493(11) |
| C(3)-H(3)    | 0.9500      | C(13)-C(16)   | 1.544(13) |
| C(4)-C(5)    | 1.361(10)   | C(14)-H(14A)  | 0.9800    |
| C(4)-H(4)    | 0.9500      | C(14)-H(14B)  | 0.9800    |
| C(5)-C(6)    | 1.415(9)    | C(14)-H(14C)  | 0.9800    |
| C(5)-H(5)    | 0.9500      | C(15)-H(15A)  | 0.9800    |
| C(6)-C(7)    | 1.520(10)   | C(15)-H(15B)  | 0.9800    |
| C(6)-C(7)#1  | 1.527(10)   | C(15)-H(15C)  | 0.9800    |
| C(7)-C(8B)   | 1.496(15)   | C(16)-H(16A)  | 0.9800    |
| C(7)-C(8A)   | 1.502(15)   | C(16)-H(16B)  | 0.9800    |
| C(7)-C(6)#1  | 1.527(10)   | C(16)-H(16C)  | 0.9800    |
| C(8A)-H(8A1) | 0.9800      | Sb(1)-F(3B)   | 1.525(19) |
| C(8A)-H(8A2) | 0.9800      | Sb(1)-F(2A)#2 | 1.814(9)  |
| C(8A)-H(8A3) | 0.9800      | Sb(1)-F(2A)   | 1.814(9)  |
| C(8B)-H(8B1) | 0.9800      | Sb(1)-F(1A)#2 | 1.804(8)  |
| C(8B)-H(8B2) | 0.9800      | Sb(1)-F(1A)   | 1.804(8)  |
| C(8B)-H(8B3) | 0.9800      | Sb(1)-F(1B)   | 1.858(15) |
| C(9)-C(10)   | 1.489(11)   | Sb(1)-F(1B)#2 | 1.859(15) |

|                   |            |                     |           |
|-------------------|------------|---------------------|-----------|
| Sb(1)-F(2B)#2     | 1.868(16)  | Cl(1)-C(17)         | 1.72(2)   |
| Sb(1)-F(2B)       | 1.868(16)  | Cl(2)-C(17)         | 1.75(2)   |
| Sb(1)-F(3A)#2     | 1.916(8)   | C(17)-H(17A)        | 0.9900    |
| Sb(1)-F(3A)       | 1.916(8)   | C(17)-H(17B)        | 0.9900    |
| O(1)-Rh(1)-P(1)#1 | 83.66(3)   | C(4)-C(5)-C(6)      | 121.2(6)  |
| O(1)-Rh(1)-P(1)   | 83.66(3)   | C(4)-C(5)-H(5)      | 119.4     |
| P(1)#1-Rh(1)-P(1) | 167.32(7)  | C(6)-C(5)-H(5)      | 119.4     |
| O(1)-Rh(1)-H(1)   | 133.708(4) | C(1)-C(6)-C(5)      | 117.0(6)  |
| P(1)#1-Rh(1)-H(1) | 94.38(4)   | C(1)-C(6)-C(7)      | 122.6(7)  |
| P(1)-Rh(1)-H(1)   | 94.37(4)   | C(5)-C(6)-C(7)      | 119.2(7)  |
| C(2)-P(1)-C(13)   | 106.0(3)   | C(1)-C(6)-C(7)#1    | 122.0(7)  |
| C(2)-P(1)-C(9)    | 105.8(3)   | C(5)-C(6)-C(7)#1    | 118.9(7)  |
| C(13)-P(1)-C(9)   | 115.2(3)   | C(7)-C(6)-C(7)#1    | 24.9(8)   |
| C(2)-P(1)-Rh(1)   | 99.60(18)  | C(8B)-C(7)-C(8A)    | 103.1(15) |
| C(13)-P(1)-Rh(1)  | 114.1(2)   | C(8B)-C(7)-C(6)     | 107.5(7)  |
| C(9)-P(1)-Rh(1)   | 114.2(2)   | C(8A)-C(7)-C(6)     | 114.7(6)  |
| C(1)#1-O(1)-C(1)  | 120.3(6)   | C(8B)-C(7)-C(6)#1   | 106.6(7)  |
| C(1)#1-O(1)-Rh(1) | 119.8(3)   | C(8A)-C(7)-C(6)#1   | 115.9(6)  |
| C(1)-O(1)-Rh(1)   | 119.8(3)   | C(6)-C(7)-C(6)#1    | 108.3(9)  |
| C(6)-C(1)-C(2)    | 123.0(5)   | C(7)-C(8A)-H(8A1)   | 109.5     |
| C(6)-C(1)-O(1)    | 120.5(5)   | C(7)-C(8A)-H(8A2)   | 109.5     |
| C(2)-C(1)-O(1)    | 116.4(5)   | H(8A1)-C(8A)-H(8A2) | 109.5     |
| C(3)-C(2)-C(1)    | 117.9(5)   | C(7)-C(8A)-H(8A3)   | 109.5     |
| C(3)-C(2)-P(1)    | 121.6(4)   | H(8A1)-C(8A)-H(8A3) | 109.5     |
| C(1)-C(2)-P(1)    | 120.5(4)   | H(8A2)-C(8A)-H(8A3) | 109.5     |
| C(2)-C(3)-C(4)    | 120.9(6)   | C(7)-C(8B)-H(8B1)   | 109.5     |
| C(2)-C(3)-H(3)    | 119.5      | C(7)-C(8B)-H(8B2)   | 109.5     |
| C(4)-C(3)-H(3)    | 119.5      | H(8B1)-C(8B)-H(8B2) | 109.5     |
| C(5)-C(4)-C(3)    | 120.0(6)   | C(7)-C(8B)-H(8B3)   | 109.5     |
| C(5)-C(4)-H(4)    | 120.0      | H(8B1)-C(8B)-H(8B3) | 109.5     |
| C(3)-C(4)-H(4)    | 120.0      | H(8B2)-C(8B)-H(8B3) | 109.5     |

|                     |          |                       |          |
|---------------------|----------|-----------------------|----------|
| C(10)-C(9)-C(11)    | 109.9(8) | H(14A)-C(14)-H(14B)   | 109.5    |
| C(10)-C(9)-C(12)    | 105.1(9) | C(13)-C(14)-H(14C)    | 109.5    |
| C(11)-C(9)-C(12)    | 107.9(9) | H(14A)-C(14)-H(14C)   | 109.5    |
| C(10)-C(9)-P(1)     | 117.7(5) | H(14B)-C(14)-H(14C)   | 109.5    |
| C(11)-C(9)-P(1)     | 109.7(6) | C(13)-C(15)-H(15A)    | 109.5    |
| C(12)-C(9)-P(1)     | 106.1(5) | C(13)-C(15)-H(15B)    | 109.5    |
| C(9)-C(10)-H(10A)   | 109.5    | H(15A)-C(15)-H(15B)   | 109.5    |
| C(9)-C(10)-H(10B)   | 109.5    | C(13)-C(15)-H(15C)    | 109.5    |
| H(10A)-C(10)-H(10B) | 109.5    | H(15A)-C(15)-H(15C)   | 109.5    |
| C(9)-C(10)-H(10C)   | 109.5    | H(15B)-C(15)-H(15C)   | 109.5    |
| H(10A)-C(10)-H(10C) | 109.5    | C(13)-C(16)-H(16A)    | 109.5    |
| H(10B)-C(10)-H(10C) | 109.5    | C(13)-C(16)-H(16B)    | 109.5    |
| C(9)-C(11)-H(11A)   | 109.5    | H(16A)-C(16)-H(16B)   | 109.5    |
| C(9)-C(11)-H(11B)   | 109.5    | C(13)-C(16)-H(16C)    | 109.5    |
| H(11A)-C(11)-H(11B) | 109.5    | H(16A)-C(16)-H(16C)   | 109.5    |
| C(9)-C(11)-H(11C)   | 109.5    | H(16B)-C(16)-H(16C)   | 109.5    |
| H(11A)-C(11)-H(11C) | 109.5    | F(3B)-Sb(1)-F(2A)#2   | 131.9(4) |
| H(11B)-C(11)-H(11C) | 109.5    | F(3B)-Sb(1)-F(2A)     | 131.9(4) |
| C(9)-C(12)-H(12A)   | 109.5    | F(2A)#2-Sb(1)-F(2A)   | 96.2(8)  |
| C(9)-C(12)-H(12B)   | 109.5    | F(3B)-Sb(1)-F(1A)#2   | 87.9(5)  |
| H(12A)-C(12)-H(12B) | 109.5    | F(2A)#2-Sb(1)-F(1A)#2 | 91.4(6)  |
| C(9)-C(12)-H(12C)   | 109.5    | F(2A)-Sb(1)-F(1A)#2   | 91.4(6)  |
| H(12A)-C(12)-H(12C) | 109.5    | F(3B)-Sb(1)-F(1A)     | 87.9(5)  |
| H(12B)-C(12)-H(12C) | 109.5    | F(2A)#2-Sb(1)-F(1A)   | 91.4(6)  |
| C(14)-C(13)-C(15)   | 109.1(8) | F(2A)-Sb(1)-F(1A)     | 91.4(6)  |
| C(14)-C(13)-C(16)   | 104.0(9) | F(1A)#2-Sb(1)-F(1A)   | 175.9(9) |
| C(15)-C(13)-C(16)   | 109.0(9) | F(3B)-Sb(1)-F(1B)     | 99.4(8)  |
| C(14)-C(13)-P(1)    | 117.7(5) | F(2A)#2-Sb(1)-F(1B)   | 50.7(8)  |
| C(15)-C(13)-P(1)    | 110.7(6) | F(2A)-Sb(1)-F(1B)     | 114.6(8) |
| C(16)-C(13)-P(1)    | 105.8(5) | F(1A)#2-Sb(1)-F(1B)   | 134.1(6) |
| C(13)-C(14)-H(14A)  | 109.5    | F(1A)-Sb(1)-F(1B)     | 46.8(6)  |
| C(13)-C(14)-H(14B)  | 109.5    | F(3B)-Sb(1)-F(1B)#2   | 99.4(8)  |

|                       |           |                       |           |
|-----------------------|-----------|-----------------------|-----------|
| F(2A)#2-Sb(1)-F(1B)#2 | 114.6(8)  | F(1A)#2-Sb(1)-F(3A)#2 | 88.4(5)   |
| F(2A)-Sb(1)-F(1B)#2   | 50.7(8)   | F(1A)-Sb(1)-F(3A)#2   | 88.7(5)   |
| F(1A)#2-Sb(1)-F(1B)#2 | 46.8(6)   | F(1B)-Sb(1)-F(3A)#2   | 68.1(8)   |
| F(1A)-Sb(1)-F(1B)#2   | 134.1(6)  | F(1B)#2-Sb(1)-F(3A)#2 | 127.3(8)  |
| F(1B)-Sb(1)-F(1B)#2   | 161.3(15) | F(2B)#2-Sb(1)-F(3A)#2 | 67.0(7)   |
| F(3B)-Sb(1)-F(2B)#2   | 98.2(7)   | F(2B)-Sb(1)-F(3A)#2   | 126.4(7)  |
| F(2A)#2-Sb(1)-F(2B)#2 | 51.9(8)   | F(3B)-Sb(1)-F(3A)     | 44.3(3)   |
| F(2A)-Sb(1)-F(2B)#2   | 115.3(8)  | F(2A)#2-Sb(1)-F(3A)   | 176.2(5)  |
| F(1A)#2-Sb(1)-F(2B)#2 | 46.2(6)   | F(2A)-Sb(1)-F(3A)     | 87.6(5)   |
| F(1A)-Sb(1)-F(2B)#2   | 134.6(6)  | F(1A)#2-Sb(1)-F(3A)   | 88.7(5)   |
| F(1B)-Sb(1)-F(2B)#2   | 88.0(8)   | F(1A)-Sb(1)-F(3A)     | 88.4(5)   |
| F(1B)#2-Sb(1)-F(2B)#2 | 89.4(8)   | F(1B)-Sb(1)-F(3A)     | 127.3(8)  |
| F(3B)-Sb(1)-F(2B)     | 98.2(7)   | F(1B)#2-Sb(1)-F(3A)   | 68.1(8)   |
| F(2A)#2-Sb(1)-F(2B)   | 115.3(8)  | F(2B)#2-Sb(1)-F(3A)   | 126.4(7)  |
| F(2A)-Sb(1)-F(2B)     | 51.9(8)   | F(2B)-Sb(1)-F(3A)     | 67.0(7)   |
| F(1A)#2-Sb(1)-F(2B)   | 134.6(6)  | F(3A)#2-Sb(1)-F(3A)   | 88.6(6)   |
| F(1A)-Sb(1)-F(2B)     | 46.2(6)   | Cl(1)-C(17)-Cl(2)     | 106.3(15) |
| F(1B)-Sb(1)-F(2B)     | 89.4(8)   | Cl(1)-C(17)-H(17A)    | 110.5     |
| F(1B)#2-Sb(1)-F(2B)   | 88.0(8)   | Cl(2)-C(17)-H(17A)    | 110.5     |
| F(2B)#2-Sb(1)-F(2B)   | 163.6(14) | Cl(1)-C(17)-H(17B)    | 110.5     |
| F(3B)-Sb(1)-F(3A)#2   | 44.3(3)   | Cl(2)-C(17)-H(17B)    | 110.5     |
| F(2A)#2-Sb(1)-F(3A)#2 | 87.6(5)   | H(17A)-C(17)-H(17B)   | 108.7     |
| F(2A)-Sb(1)-F(3A)#2   | 176.2(5)  |                       |           |

---

Symmetry transformations used to generate equivalent atoms:

#1 -x+1,y,-z+1 #2 -x+1,y,-z

Table F5. Anisotropic displacement parameters ( $\text{\AA}^2 \times 10^3$ ) for  $[(^t\text{Bu})\text{xanPOP}]\text{Rh}(\text{H})_2]\text{SbF}_6$ . The anisotropic displacement factor exponent takes the form:  $-2\pi^2[ h^2 a^{*2}U^{11} + \dots + 2 h k a^* b^* U^{12} ]$

|       | $U^{11}$ | $U^{22}$ | $U^{33}$ | $U^{23}$ | $U^{13}$ | $U^{12}$ |
|-------|----------|----------|----------|----------|----------|----------|
| Rh(1) | 22(1)    | 19(1)    | 31(1)    | 0        | 13(1)    | 0        |
| P(1)  | 19(1)    | 17(1)    | 34(1)    | 0(1)     | 11(1)    | 0(1)     |
| O(1)  | 19(2)    | 18(2)    | 49(3)    | 0        | 9(2)     | 0        |
| C(1)  | 24(2)    | 21(2)    | 37(3)    | -2(2)    | 13(2)    | -4(2)    |
| C(2)  | 25(2)    | 22(2)    | 22(2)    | -2(2)    | 14(2)    | -6(2)    |
| C(3)  | 27(2)    | 25(2)    | 24(2)    | 0(2)     | 14(2)    | -2(2)    |
| C(4)  | 33(3)    | 27(2)    | 31(3)    | -4(2)    | 19(2)    | -9(2)    |
| C(5)  | 34(3)    | 23(2)    | 42(3)    | -3(2)    | 18(2)    | -9(2)    |
| C(6)  | 29(3)    | 21(2)    | 53(3)    | -2(2)    | 14(2)    | -2(2)    |
| C(7)  | 26(4)    | 34(5)    | 46(5)    | -10(3)   | 19(4)    | 2(4)     |
| C(8A) | 42(6)    | 50(7)    | 61(6)    | 16(5)    | 23(5)    | -6(5)    |
| C(8B) | 40(6)    | 42(6)    | 70(7)    | -25(5)   | 16(6)    | 3(5)     |
| C(9)  | 36(3)    | 41(4)    | 43(3)    | -10(2)   | 21(3)    | 0(2)     |
| C(10) | 46(4)    | 91(5)    | 63(4)    | -31(4)   | 39(3)    | -19(4)   |
| C(11) | 62(5)    | 50(4)    | 118(7)   | -33(4)   | 59(5)    | -4(3)    |
| C(12) | 108(6)   | 102(6)   | 48(4)    | 6(4)     | 46(4)    | 54(5)    |
| C(13) | 39(3)    | 38(3)    | 51(3)    | 13(2)    | 28(3)    | 1(2)     |
| C(14) | 52(4)    | 89(5)    | 37(3)    | 14(4)    | 18(3)    | -19(4)   |
| C(15) | 72(5)    | 45(4)    | 59(5)    | 24(3)    | 0(4)     | -11(4)   |
| C(16) | 107(6)   | 97(6)    | 73(5)    | 42(4)    | 71(5)    | 37(5)    |
| Sb(1) | 13(1)    | 70(1)    | 28(1)    | 0        | 7(1)     | 0        |
| F(1A) | 81(5)    | 163(7)   | 53(4)    | 15(5)    | 48(4)    | -1(5)    |
| F(2A) | 55(5)    | 61(4)    | 135(8)   | 7(5)     | 28(5)    | 22(4)    |
| F(3A) | 41(4)    | 62(4)    | 86(5)    | -7(4)    | 23(4)    | -13(3)   |
| F(1B) | 54(6)    | 99(8)    | 64(7)    | 2(7)     | 45(5)    | 7(6)     |
| F(2B) | 54(6)    | 83(7)    | 53(5)    | 0(6)     | 27(5)    | -4(6)    |
| F(3B) | 85(7)    | 86(6)    | 89(7)    | 0        | 43(5)    | 0        |
| Cl(1) | 184(9)   | 155(8)   | 190(8)   | 49(6)    | 88(7)    | -19(7)   |
| Cl(2) | 236(10)  | 163(9)   | 255(11)  | -15(8)   | 123(8)   | -30(8)   |
| C(17) | 202(16)  | 213(17)  | 205(14)  | 2(9)     | 117(12)  | -12(9)   |

Table F6. Hydrogen coordinates ( $\times 10^4$ ) and isotropic displacement parameters ( $\text{\AA}^2 \times 10^{-3}$ ) for mh315-C2.

|        | x    | y     | z     | U(eq) |
|--------|------|-------|-------|-------|
| H(1)   | 5000 | -1000 | 6000  | 38    |
| H(3)   | 7684 | 2105  | 7685  | 30    |
| H(4)   | 7746 | 4305  | 7748  | 36    |
| H(5)   | 6561 | 5470  | 6542  | 42    |
| H(8A1) | 4495 | 5853  | 2879  | 82    |
| H(8A2) | 5033 | 4721  | 2906  | 82    |
| H(8A3) | 5471 | 5933  | 3891  | 82    |
| H(8B1) | 4511 | 6379  | 4907  | 87    |
| H(8B2) | 5489 | 6378  | 5885  | 87    |
| H(8B3) | 5000 | 5572  | 6368  | 87    |
| H(10A) | 7885 | 877   | 6452  | 93    |
| H(10B) | 7963 | -259  | 5603  | 93    |
| H(10C) | 8095 | -501  | 7136  | 93    |
| H(11A) | 6154 | -1815 | 4625  | 108   |
| H(11B) | 7044 | -2138 | 6023  | 108   |
| H(11C) | 6919 | -1882 | 4498  | 108   |
| H(12A) | 6583 | 1336  | 4264  | 128   |
| H(12B) | 5896 | 274   | 3487  | 128   |
| H(12C) | 6710 | 165   | 3514  | 128   |
| H(14A) | 7890 | 865   | 9303  | 95    |
| H(14B) | 8097 | -525  | 9068  | 95    |
| H(14C) | 7960 | -251  | 10326 | 95    |
| H(15A) | 6161 | -1832 | 7694  | 118   |
| H(15B) | 6920 | -1876 | 9355  | 118   |
| H(15C) | 7055 | -2147 | 8094  | 118   |
| H(16A) | 6586 | 1364  | 8883  | 122   |
| H(16B) | 6729 | 220   | 9928  | 122   |
| H(16C) | 5903 | 302   | 8340  | 122   |
| H(17A) | 5349 | 4377  | 711   | 247   |
| H(17B) | 4513 | 3621  | -355  | 247   |

Table F7. Torsion angles [°] for [(<sup>t</sup>Bu<sub>xanPOP</sub>)Rh(H)<sub>2</sub>]SbF<sub>6</sub>.

|                          |           |                         |            |
|--------------------------|-----------|-------------------------|------------|
| O(1)-Rh(1)-P(1)-C(2)     | 0.08(17)  | C(4)-C(5)-C(6)-C(1)     | 0.5(11)    |
| P(1)#1-Rh(1)-P(1)-C(2)   | 0.09(17)  | C(4)-C(5)-C(6)-C(7)     | -167.1(7)  |
| O(1)-Rh(1)-P(1)-C(13)    | 112.5(3)  | C(4)-C(5)-C(6)-C(7)#1   | 164.4(7)   |
| P(1)#1-Rh(1)-P(1)-C(13)  | 112.5(3)  | C(1)-C(6)-C(7)-C(8B)    | 139.6(11)  |
| O(1)-Rh(1)-P(1)-C(9)     | -112.2(3) | C(5)-C(6)-C(7)-C(8B)    | -53.5(13)  |
| P(1)#1-Rh(1)-P(1)-C(9)   | -112.2(3) | C(7)#1-C(6)-C(7)-C(8B)  | 43.0(10)   |
| P(1)#1-Rh(1)-O(1)-C(1)#1 | -0.2(3)   | C(1)-C(6)-C(7)-C(8A)    | -106.4(12) |
| P(1)-Rh(1)-O(1)-C(1)#1   | 179.8(3)  | C(5)-C(6)-C(7)-C(8A)    | 60.5(13)   |
| P(1)#1-Rh(1)-O(1)-C(1)   | 179.8(3)  | C(7)#1-C(6)-C(7)-C(8A)  | 157.0(10)  |
| P(1)-Rh(1)-O(1)-C(1)     | -0.2(3)   | C(1)-C(6)-C(7)-C(6)#1   | 24.8(9)    |
| C(1)#1-O(1)-C(1)-C(6)    | -1.0(5)   | C(5)-C(6)-C(7)-C(6)#1   | -168.3(9)  |
| Rh(1)-O(1)-C(1)-C(6)     | 179.0(5)  | C(7)#1-C(6)-C(7)-C(6)#1 | -71.8(6)   |
| C(1)#1-O(1)-C(1)-C(2)    | -179.8(6) | C(2)-P(1)-C(9)-C(10)    | 64.1(8)    |
| Rh(1)-O(1)-C(1)-C(2)     | 0.2(6)    | C(13)-P(1)-C(9)-C(10)   | -52.6(8)   |
| C(6)-C(1)-C(2)-C(3)      | 1.0(10)   | Rh(1)-P(1)-C(9)-C(10)   | 172.6(7)   |
| O(1)-C(1)-C(2)-C(3)      | 179.7(4)  | C(2)-P(1)-C(9)-C(11)    | -169.4(7)  |
| C(6)-C(1)-C(2)-P(1)      | -178.9(6) | C(13)-P(1)-C(9)-C(11)   | 73.9(8)    |
| O(1)-C(1)-C(2)-P(1)      | -0.1(7)   | Rh(1)-P(1)-C(9)-C(11)   | -60.9(7)   |
| C(13)-P(1)-C(2)-C(3)     | 61.6(5)   | C(2)-P(1)-C(9)-C(12)    | -53.2(8)   |
| C(9)-P(1)-C(2)-C(3)      | -61.2(5)  | C(13)-P(1)-C(9)-C(12)   | -169.8(7)  |
| Rh(1)-P(1)-C(2)-C(3)     | -179.9(4) | Rh(1)-P(1)-C(9)-C(12)   | 55.3(7)    |
| C(13)-P(1)-C(2)-C(1)     | -118.6(5) | C(2)-P(1)-C(13)-C(14)   | -64.1(8)   |
| C(9)-P(1)-C(2)-C(1)      | 118.6(5)  | C(9)-P(1)-C(13)-C(14)   | 52.5(8)    |
| Rh(1)-P(1)-C(2)-C(1)     | 0.0(5)    | Rh(1)-P(1)-C(13)-C(14)  | -172.6(7)  |
| C(1)-C(2)-C(3)-C(4)      | -0.1(8)   | C(2)-P(1)-C(13)-C(15)   | 169.4(7)   |
| P(1)-C(2)-C(3)-C(4)      | 179.7(4)  | C(9)-P(1)-C(13)-C(15)   | -74.0(8)   |
| C(2)-C(3)-C(4)-C(5)      | -0.5(9)   | Rh(1)-P(1)-C(13)-C(15)  | 60.9(8)    |
| C(3)-C(4)-C(5)-C(6)      | 0.3(10)   | C(2)-P(1)-C(13)-C(16)   | 51.5(7)    |
| C(2)-C(1)-C(6)-C(5)      | -1.2(11)  | C(9)-P(1)-C(13)-C(16)   | 168.1(7)   |
| O(1)-C(1)-C(6)-C(5)      | -179.9(6) | Rh(1)-P(1)-C(13)-C(16)  | -57.0(7)   |
| C(2)-C(1)-C(6)-C(7)      | 166.0(7)  |                         |            |
| O(1)-C(1)-C(6)-C(7)      | -12.8(11) |                         |            |
| C(2)-C(1)-C(6)-C(7)#1    | -164.5(7) |                         |            |
| O(1)-C(1)-C(6)-C(7)#1    | 16.7(11)  |                         |            |

---

Symmetry transformations used to generate equivalent atoms: #1  $-x+1,y,-z+1$  #2  $-x+1,y,-z$



Figure G1: ORTEP diagram of (<sup>t</sup>Bu<sub>xan</sub>POP)Rh(H)

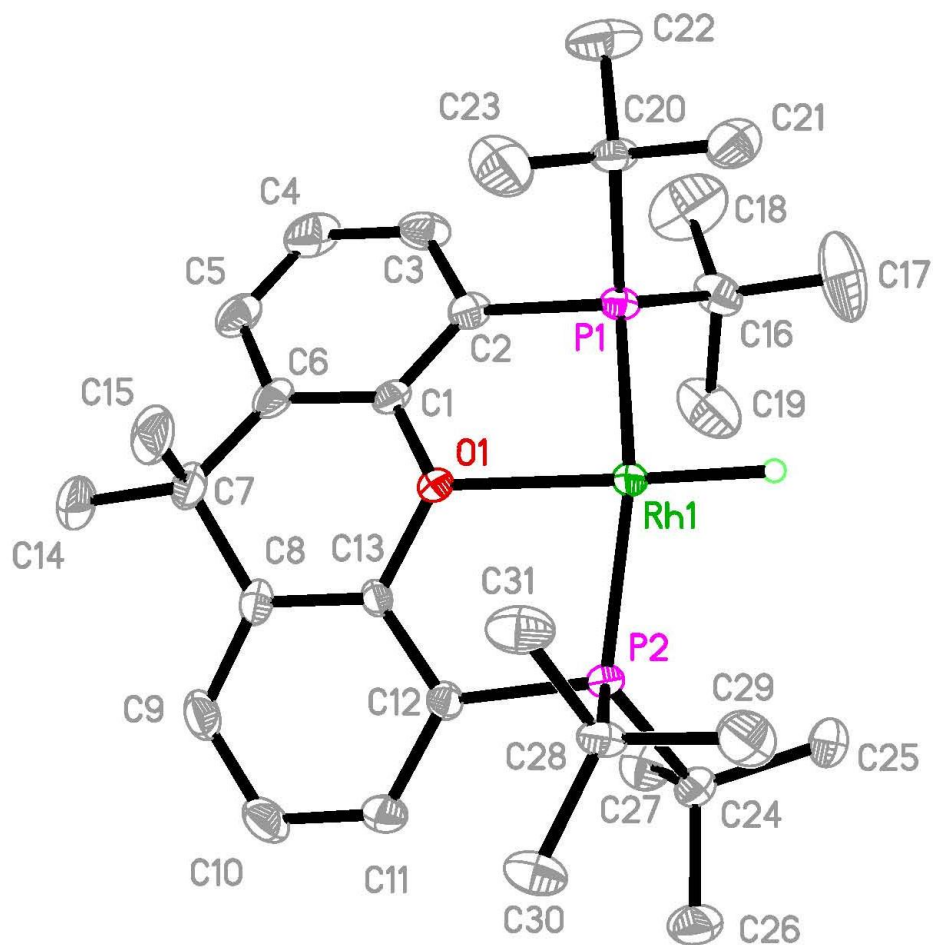

Table G2. Crystal data and structure refinement for (<sup>t</sup>Bu<sub>3</sub>xanPOP)Rh(H).

|                                   |                                                     |          |
|-----------------------------------|-----------------------------------------------------|----------|
| Identification code               | mh316                                               |          |
| Empirical formula                 | C <sub>31</sub> H <sub>49</sub> O P <sub>2</sub> Rh |          |
| Formula weight                    | 602.55                                              |          |
| Temperature                       | 100(2) K                                            |          |
| Wavelength                        | 0.71073 Å                                           |          |
| Crystal system                    | Orthorhombic                                        |          |
| Space group                       | Pbca                                                |          |
| Unit cell dimensions              | a = 15.2555(12) Å                                   | α = 90°. |
|                                   | b = 19.6805(15) Å                                   | β = 90°. |
|                                   | c = 20.5255(16) Å                                   | γ = 90°. |
| Volume                            | 6162.5(8) Å <sup>3</sup>                            |          |
| Z                                 | 8                                                   |          |
| Density (calculated)              | 1.299 Mg/m <sup>3</sup>                             |          |
| Absorption coefficient            | 0.679 mm <sup>-1</sup>                              |          |
| F(000)                            | 2544                                                |          |
| Crystal size                      | 0.38 x 0.18 x 0.04 mm <sup>3</sup>                  |          |
| Theta range for data collection   | 1.96 to 30.03°.                                     |          |
| Index ranges                      | 0 ≤ h ≤ 21, 0 ≤ k ≤ 27, 0 ≤ l ≤ 28                  |          |
| Reflections collected             | 9007                                                |          |
| Independent reflections           | 9007 [R(int) = 0.0000]                              |          |
| Completeness to theta = 30.03°    | 100.0 %                                             |          |
| Absorption correction             | Semi-empirical from equivalents                     |          |
| Max. and min. transmission        | 0.9734 and 0.7825                                   |          |
| Refinement method                 | Full-matrix least-squares on F <sup>2</sup>         |          |
| Data / restraints / parameters    | 9007 / 1 / 334                                      |          |
| Goodness-of-fit on F <sup>2</sup> | 1.001                                               |          |
| Final R indices [I > 2σ(I)]       | R1 = 0.0577, wR2 = 0.1215                           |          |
| R indices (all data)              | R1 = 0.0786, wR2 = 0.1306                           |          |
| Largest diff. peak and hole       | 1.157 and -0.802 e.Å <sup>-3</sup>                  |          |

Table G3. Atomic coordinates ( $\times 10^4$ ) and equivalent isotropic displacement parameters ( $\text{\AA}^2 \times 10^3$ ) for (**<sup>t</sup>Bu<sub>x</sub>anPOP**)Rh(**H**).  $U(\text{eq})$  is defined as one third of the trace of the orthogonalized  $U^{ij}$  tensor.

|       | x        | y       | z       | $U(\text{eq})$ |
|-------|----------|---------|---------|----------------|
| Rh(1) | 7894(1)  | 1346(1) | 6023(1) | 16(1)          |
| P(1)  | 8926(1)  | 1151(1) | 6766(1) | 17(1)          |
| P(2)  | 7181(1)  | 1751(1) | 5155(1) | 16(1)          |
| O(1)  | 8236(2)  | 2411(1) | 6187(1) | 16(1)          |
| C(1)  | 8963(2)  | 2556(2) | 6578(2) | 17(1)          |
| C(2)  | 9414(2)  | 2006(2) | 6854(2) | 20(1)          |
| C(3)  | 10141(2) | 2166(2) | 7241(2) | 28(1)          |
| C(4)  | 10394(3) | 2834(2) | 7345(2) | 34(1)          |
| C(5)  | 9912(3)  | 3358(2) | 7082(2) | 29(1)          |
| C(6)  | 9179(2)  | 3235(2) | 6701(2) | 21(1)          |
| C(7)  | 8556(3)  | 3784(2) | 6465(2) | 24(1)          |
| C(8)  | 8194(2)  | 3570(2) | 5809(2) | 20(1)          |
| C(9)  | 7963(3)  | 4028(2) | 5318(2) | 28(1)          |
| C(10) | 7546(3)  | 3807(2) | 4759(2) | 30(1)          |
| C(11) | 7314(2)  | 3134(2) | 4696(2) | 24(1)          |
| C(12) | 7521(2)  | 2649(2) | 5175(2) | 18(1)          |
| C(13) | 7993(2)  | 2889(2) | 5710(2) | 16(1)          |
| C(14) | 8966(3)  | 4492(2) | 6447(2) | 35(1)          |
| C(15) | 7770(3)  | 3801(2) | 6950(2) | 34(1)          |
| C(16) | 9843(2)  | 570(2)  | 6494(2) | 26(1)          |
| C(17) | 9494(3)  | -149(2) | 6479(3) | 58(2)          |
| C(18) | 10699(4) | 592(4)  | 6880(3) | 67(2)          |
| C(19) | 10054(4) | 783(3)  | 5805(2) | 53(1)          |
| C(20) | 8560(2)  | 977(2)  | 7632(2) | 23(1)          |
| C(21) | 7972(3)  | 351(2)  | 7622(2) | 36(1)          |
| C(22) | 9267(3)  | 866(3)  | 8147(2) | 45(1)          |
| C(23) | 7997(4)  | 1587(2) | 7819(2) | 47(1)          |
| C(24) | 7543(3)  | 1428(2) | 4330(2) | 23(1)          |

|       |         |         |         |       |
|-------|---------|---------|---------|-------|
| C(25) | 7576(3) | 644(2)  | 4378(2) | 32(1) |
| C(26) | 6977(3) | 1619(2) | 3746(2) | 34(1) |
| C(27) | 8484(3) | 1681(2) | 4226(2) | 33(1) |
| C(28) | 5951(2) | 1815(2) | 5222(2) | 21(1) |
| C(29) | 5568(3) | 1100(2) | 5154(2) | 35(1) |
| C(30) | 5468(3) | 2308(2) | 4771(2) | 30(1) |
| C(31) | 5795(3) | 2064(2) | 5925(2) | 32(1) |

---

Table G4. Bond lengths [Å] and angles [°] for (<sup>t</sup>Bu<sub>xan</sub>POP)Rh(H).

|             |           |              |          |
|-------------|-----------|--------------|----------|
| Rh(1)-O(1)  | 2.186(2)  | C(11)-H(11)  | 0.9500   |
| Rh(1)-P(1)  | 2.2261(9) | C(12)-C(13)  | 1.397(4) |
| Rh(1)-P(2)  | 2.2342(8) | C(14)-H(14A) | 0.9800   |
| Rh(1)-H(1)  | 1.607(10) | C(14)-H(14B) | 0.9800   |
| P(1)-C(2)   | 1.849(3)  | C(14)-H(14C) | 0.9800   |
| P(1)-C(16)  | 1.890(4)  | C(15)-H(15A) | 0.9800   |
| P(1)-C(20)  | 1.894(3)  | C(15)-H(15B) | 0.9800   |
| P(2)-C(12)  | 1.841(3)  | C(15)-H(15C) | 0.9800   |
| P(2)-C(28)  | 1.886(4)  | C(16)-C(19)  | 1.510(6) |
| P(2)-C(24)  | 1.892(3)  | C(16)-C(17)  | 1.512(6) |
| O(1)-C(1)   | 1.399(4)  | C(16)-C(18)  | 1.528(6) |
| O(1)-C(13)  | 1.406(4)  | C(17)-H(17A) | 0.9800   |
| C(1)-C(6)   | 1.400(4)  | C(17)-H(17B) | 0.9800   |
| C(1)-C(2)   | 1.401(5)  | C(17)-H(17C) | 0.9800   |
| C(2)-C(3)   | 1.401(5)  | C(18)-H(18A) | 0.9800   |
| C(3)-C(4)   | 1.386(5)  | C(18)-H(18B) | 0.9800   |
| C(3)-H(3)   | 0.9500    | C(18)-H(18C) | 0.9800   |
| C(4)-C(5)   | 1.377(6)  | C(19)-H(19A) | 0.9800   |
| C(4)-H(4)   | 0.9500    | C(19)-H(19B) | 0.9800   |
| C(5)-C(6)   | 1.386(5)  | C(19)-H(19C) | 0.9800   |
| C(5)-H(5)   | 0.9500    | C(20)-C(21)  | 1.524(5) |
| C(6)-C(7)   | 1.518(5)  | C(20)-C(23)  | 1.525(6) |
| C(7)-C(8)   | 1.515(5)  | C(20)-C(22)  | 1.527(5) |
| C(7)-C(14)  | 1.528(5)  | C(21)-H(21A) | 0.9800   |
| C(7)-C(15)  | 1.558(5)  | C(21)-H(21B) | 0.9800   |
| C(8)-C(13)  | 1.389(4)  | C(21)-H(21C) | 0.9800   |
| C(8)-C(9)   | 1.397(5)  | C(22)-H(22A) | 0.9800   |
| C(9)-C(10)  | 1.383(6)  | C(22)-H(22B) | 0.9800   |
| C(9)-H(9)   | 0.9500    | C(22)-H(22C) | 0.9800   |
| C(10)-C(11) | 1.378(5)  | C(23)-H(23A) | 0.9800   |
| C(10)-H(10) | 0.9500    | C(23)-H(23B) | 0.9800   |
| C(11)-C(12) | 1.407(4)  | C(23)-H(23C) | 0.9800   |

|                  |            |                 |          |
|------------------|------------|-----------------|----------|
| C(24)-C(26)      | 1.524(5)   | C(28)-C(30)     | 1.530(5) |
| C(24)-C(27)      | 1.533(6)   | C(28)-C(29)     | 1.531(5) |
| C(24)-C(25)      | 1.546(5)   | C(28)-C(31)     | 1.543(5) |
| C(25)-H(25A)     | 0.9800     | C(29)-H(29A)    | 0.9800   |
| C(25)-H(25B)     | 0.9800     | C(29)-H(29B)    | 0.9800   |
| C(25)-H(25C)     | 0.9800     | C(29)-H(29C)    | 0.9800   |
| C(26)-H(26A)     | 0.9800     | C(30)-H(30A)    | 0.9800   |
| C(26)-H(26B)     | 0.9800     | C(30)-H(30B)    | 0.9800   |
| C(26)-H(26C)     | 0.9800     | C(30)-H(30C)    | 0.9800   |
| C(27)-H(27A)     | 0.9800     | C(31)-H(31A)    | 0.9800   |
| C(27)-H(27B)     | 0.9800     | C(31)-H(31B)    | 0.9800   |
| C(27)-H(27C)     | 0.9800     | C(31)-H(31C)    | 0.9800   |
| O(1)-Rh(1)-P(1)  | 83.75(6)   | O(1)-C(1)-C(6)  | 118.9(3) |
| O(1)-Rh(1)-P(2)  | 84.04(6)   | O(1)-C(1)-C(2)  | 117.7(3) |
| P(1)-Rh(1)-P(2)  | 162.20(3)  | C(6)-C(1)-C(2)  | 123.3(3) |
| O(1)-Rh(1)-H(1)  | 175.2(15)  | C(3)-C(2)-C(1)  | 116.4(3) |
| P(1)-Rh(1)-H(1)  | 96.8(15)   | C(3)-C(2)-P(1)  | 125.3(3) |
| P(2)-Rh(1)-H(1)  | 96.4(15)   | C(1)-C(2)-P(1)  | 117.8(2) |
| C(2)-P(1)-C(16)  | 106.36(17) | C(4)-C(3)-C(2)  | 121.4(4) |
| C(2)-P(1)-C(20)  | 101.14(15) | C(4)-C(3)-H(3)  | 119.3    |
| C(16)-P(1)-C(20) | 112.70(16) | C(2)-C(3)-H(3)  | 119.3    |
| C(2)-P(1)-Rh(1)  | 101.20(11) | C(5)-C(4)-C(3)  | 120.0(4) |
| C(16)-P(1)-Rh(1) | 115.15(13) | C(5)-C(4)-H(4)  | 120.0    |
| C(20)-P(1)-Rh(1) | 117.70(12) | C(3)-C(4)-H(4)  | 120.0    |
| C(12)-P(2)-C(28) | 102.38(15) | C(4)-C(5)-C(6)  | 121.5(3) |
| C(12)-P(2)-C(24) | 105.06(15) | C(4)-C(5)-H(5)  | 119.3    |
| C(28)-P(2)-C(24) | 112.18(16) | C(6)-C(5)-H(5)  | 119.3    |
| C(12)-P(2)-Rh(1) | 100.86(11) | C(5)-C(6)-C(1)  | 117.2(3) |
| C(28)-P(2)-Rh(1) | 116.75(11) | C(5)-C(6)-C(7)  | 124.1(3) |
| C(24)-P(2)-Rh(1) | 116.89(12) | C(1)-C(6)-C(7)  | 118.4(3) |
| C(1)-O(1)-C(13)  | 118.2(2)   | C(8)-C(7)-C(6)  | 108.2(3) |
| C(1)-O(1)-Rh(1)  | 118.19(18) | C(8)-C(7)-C(14) | 112.4(3) |
| C(13)-O(1)-Rh(1) | 118.13(18) | C(6)-C(7)-C(14) | 113.6(3) |

|                     |          |                     |          |
|---------------------|----------|---------------------|----------|
| C(8)-C(7)-C(15)     | 107.0(3) | C(19)-C(16)-C(18)   | 107.2(4) |
| C(6)-C(7)-C(15)     | 107.1(3) | C(17)-C(16)-C(18)   | 109.8(4) |
| C(14)-C(7)-C(15)    | 108.1(3) | C(19)-C(16)-P(1)    | 105.5(3) |
| C(13)-C(8)-C(9)     | 117.5(3) | C(17)-C(16)-P(1)    | 108.2(3) |
| C(13)-C(8)-C(7)     | 118.6(3) | C(18)-C(16)-P(1)    | 117.5(3) |
| C(9)-C(8)-C(7)      | 123.6(3) | C(16)-C(17)-H(17A)  | 109.5    |
| C(10)-C(9)-C(8)     | 120.8(3) | C(16)-C(17)-H(17B)  | 109.5    |
| C(10)-C(9)-H(9)     | 119.6    | H(17A)-C(17)-H(17B) | 109.5    |
| C(8)-C(9)-H(9)      | 119.6    | C(16)-C(17)-H(17C)  | 109.5    |
| C(11)-C(10)-C(9)    | 119.9(3) | H(17A)-C(17)-H(17C) | 109.5    |
| C(11)-C(10)-H(10)   | 120.1    | H(17B)-C(17)-H(17C) | 109.5    |
| C(9)-C(10)-H(10)    | 120.1    | C(16)-C(18)-H(18A)  | 109.5    |
| C(10)-C(11)-C(12)   | 121.9(3) | C(16)-C(18)-H(18B)  | 109.5    |
| C(10)-C(11)-H(11)   | 119.0    | H(18A)-C(18)-H(18B) | 109.5    |
| C(12)-C(11)-H(11)   | 119.0    | C(16)-C(18)-H(18C)  | 109.5    |
| C(13)-C(12)-C(11)   | 115.9(3) | H(18A)-C(18)-H(18C) | 109.5    |
| C(13)-C(12)-P(2)    | 119.1(2) | H(18B)-C(18)-H(18C) | 109.5    |
| C(11)-C(12)-P(2)    | 125.0(3) | C(16)-C(19)-H(19A)  | 109.5    |
| C(8)-C(13)-C(12)    | 123.7(3) | C(16)-C(19)-H(19B)  | 109.5    |
| C(8)-C(13)-O(1)     | 119.0(3) | H(19A)-C(19)-H(19B) | 109.5    |
| C(12)-C(13)-O(1)    | 117.2(3) | C(16)-C(19)-H(19C)  | 109.5    |
| C(7)-C(14)-H(14A)   | 109.5    | H(19A)-C(19)-H(19C) | 109.5    |
| C(7)-C(14)-H(14B)   | 109.5    | H(19B)-C(19)-H(19C) | 109.5    |
| H(14A)-C(14)-H(14B) | 109.5    | C(21)-C(20)-C(23)   | 108.0(4) |
| C(7)-C(14)-H(14C)   | 109.5    | C(21)-C(20)-C(22)   | 108.0(3) |
| H(14A)-C(14)-H(14C) | 109.5    | C(23)-C(20)-C(22)   | 109.7(4) |
| H(14B)-C(14)-H(14C) | 109.5    | C(21)-C(20)-P(1)    | 107.9(2) |
| C(7)-C(15)-H(15A)   | 109.5    | C(23)-C(20)-P(1)    | 105.0(3) |
| C(7)-C(15)-H(15B)   | 109.5    | C(22)-C(20)-P(1)    | 117.8(3) |
| H(15A)-C(15)-H(15B) | 109.5    | C(20)-C(21)-H(21A)  | 109.5    |
| C(7)-C(15)-H(15C)   | 109.5    | C(20)-C(21)-H(21B)  | 109.5    |
| H(15A)-C(15)-H(15C) | 109.5    | H(21A)-C(21)-H(21B) | 109.5    |
| H(15B)-C(15)-H(15C) | 109.5    | C(20)-C(21)-H(21C)  | 109.5    |
| C(19)-C(16)-C(17)   | 108.3(4) | H(21A)-C(21)-H(21C) | 109.5    |

|                     |          |                     |          |
|---------------------|----------|---------------------|----------|
| H(21B)-C(21)-H(21C) | 109.5    | C(24)-C(27)-H(27A)  | 109.5    |
| C(20)-C(22)-H(22A)  | 109.5    | C(24)-C(27)-H(27B)  | 109.5    |
| C(20)-C(22)-H(22B)  | 109.5    | H(27A)-C(27)-H(27B) | 109.5    |
| H(22A)-C(22)-H(22B) | 109.5    | C(24)-C(27)-H(27C)  | 109.5    |
| C(20)-C(22)-H(22C)  | 109.5    | H(27A)-C(27)-H(27C) | 109.5    |
| H(22A)-C(22)-H(22C) | 109.5    | H(27B)-C(27)-H(27C) | 109.5    |
| H(22B)-C(22)-H(22C) | 109.5    | C(30)-C(28)-C(29)   | 110.1(3) |
| C(20)-C(23)-H(23A)  | 109.5    | C(30)-C(28)-C(31)   | 106.9(3) |
| C(20)-C(23)-H(23B)  | 109.5    | C(29)-C(28)-C(31)   | 108.5(3) |
| H(23A)-C(23)-H(23B) | 109.5    | C(30)-C(28)-P(2)    | 118.5(2) |
| C(20)-C(23)-H(23C)  | 109.5    | C(29)-C(28)-P(2)    | 108.2(3) |
| H(23A)-C(23)-H(23C) | 109.5    | C(31)-C(28)-P(2)    | 104.0(2) |
| H(23B)-C(23)-H(23C) | 109.5    | C(28)-C(29)-H(29A)  | 109.5    |
| C(26)-C(24)-C(27)   | 110.0(3) | C(28)-C(29)-H(29B)  | 109.5    |
| C(26)-C(24)-C(25)   | 108.3(3) | H(29A)-C(29)-H(29B) | 109.5    |
| C(27)-C(24)-C(25)   | 107.6(3) | C(28)-C(29)-H(29C)  | 109.5    |
| C(26)-C(24)-P(2)    | 117.1(3) | H(29A)-C(29)-H(29C) | 109.5    |
| C(27)-C(24)-P(2)    | 106.7(2) | H(29B)-C(29)-H(29C) | 109.5    |
| C(25)-C(24)-P(2)    | 106.7(3) | C(28)-C(30)-H(30A)  | 109.5    |
| C(24)-C(25)-H(25A)  | 109.5    | C(28)-C(30)-H(30B)  | 109.5    |
| C(24)-C(25)-H(25B)  | 109.5    | H(30A)-C(30)-H(30B) | 109.5    |
| H(25A)-C(25)-H(25B) | 109.5    | C(28)-C(30)-H(30C)  | 109.5    |
| C(24)-C(25)-H(25C)  | 109.5    | H(30A)-C(30)-H(30C) | 109.5    |
| H(25A)-C(25)-H(25C) | 109.5    | H(30B)-C(30)-H(30C) | 109.5    |
| H(25B)-C(25)-H(25C) | 109.5    | C(28)-C(31)-H(31A)  | 109.5    |
| C(24)-C(26)-H(26A)  | 109.5    | C(28)-C(31)-H(31B)  | 109.5    |
| C(24)-C(26)-H(26B)  | 109.5    | H(31A)-C(31)-H(31B) | 109.5    |
| H(26A)-C(26)-H(26B) | 109.5    | C(28)-C(31)-H(31C)  | 109.5    |
| C(24)-C(26)-H(26C)  | 109.5    | H(31A)-C(31)-H(31C) | 109.5    |
| H(26A)-C(26)-H(26C) | 109.5    | H(31B)-C(31)-H(31C) | 109.5    |
| H(26B)-C(26)-H(26C) | 109.5    |                     |          |

---



Table G5. Anisotropic displacement parameters ( $\text{\AA}^2 \times 10^3$ ) for ( $^t\text{Bu}$ xanPOP)Rh(H). The anisotropic displacement factor exponent takes the form:  $-2\pi^2 [ h^2 a^{*2}U^{11} + \dots + 2 h k a^* b^* U^{12} ]$

|       | $U^{11}$ | $U^{22}$ | $U^{33}$ | $U^{23}$ | $U^{13}$ | $U^{12}$ |
|-------|----------|----------|----------|----------|----------|----------|
| Rh(1) | 19(1)    | 14(1)    | 15(1)    | 1(1)     | -4(1)    | 0(1)     |
| P(1)  | 16(1)    | 20(1)    | 15(1)    | 3(1)     | -2(1)    | 0(1)     |
| P(2)  | 19(1)    | 16(1)    | 13(1)    | 0(1)     | -3(1)    | 0(1)     |
| O(1)  | 19(1)    | 16(1)    | 14(1)    | -1(1)    | -3(1)    | -1(1)    |
| C(1)  | 20(2)    | 21(2)    | 12(1)    | -2(1)    | 1(1)     | -5(1)    |
| C(2)  | 20(2)    | 24(2)    | 17(2)    | 1(1)     | -1(1)    | -6(1)    |
| C(3)  | 24(2)    | 36(2)    | 25(2)    | 8(2)     | -7(2)    | -7(2)    |
| C(4)  | 29(2)    | 45(2)    | 28(2)    | 1(2)     | -8(2)    | -19(2)   |
| C(5)  | 33(2)    | 31(2)    | 21(2)    | -4(1)    | 0(2)     | -15(2)   |
| C(6)  | 25(2)    | 24(2)    | 14(1)    | -4(1)    | 5(1)     | -7(1)    |
| C(7)  | 33(2)    | 18(2)    | 22(2)    | -5(1)    | 5(1)     | -4(1)    |
| C(8)  | 24(2)    | 16(1)    | 21(2)    | -4(1)    | 5(1)     | -3(1)    |
| C(9)  | 39(2)    | 14(1)    | 30(2)    | 2(1)     | 4(2)     | 0(1)     |
| C(10) | 40(2)    | 22(2)    | 26(2)    | 9(1)     | 2(2)     | 3(2)     |
| C(11) | 32(2)    | 24(2)    | 17(2)    | 5(1)     | -2(1)    | -2(1)    |
| C(12) | 23(2)    | 15(1)    | 15(1)    | 1(1)     | 3(1)     | -1(1)    |
| C(13) | 22(2)    | 12(1)    | 14(1)    | 0(1)     | 4(1)     | 1(1)     |
| C(14) | 49(3)    | 21(2)    | 35(2)    | -6(2)    | -3(2)    | -7(2)    |
| C(15) | 41(2)    | 28(2)    | 33(2)    | -10(2)   | 9(2)     | 8(2)     |
| C(16) | 21(2)    | 28(2)    | 28(2)    | 6(1)     | 4(1)     | 7(1)     |
| C(17) | 44(3)    | 26(2)    | 106(5)   | -4(3)    | 28(3)    | 6(2)     |
| C(18) | 42(3)    | 97(5)    | 64(4)    | -19(3)   | -13(3)   | 36(3)    |
| C(19) | 67(3)    | 47(3)    | 45(3)    | 13(2)    | 31(3)    | 24(3)    |
| C(20) | 26(2)    | 29(2)    | 14(1)    | 3(1)     | -2(1)    | -6(1)    |
| C(21) | 46(3)    | 40(2)    | 22(2)    | 1(2)     | 6(2)     | -22(2)   |
| C(22) | 36(2)    | 75(3)    | 23(2)    | 10(2)    | -9(2)    | -14(2)   |
| C(23) | 61(3)    | 42(2)    | 37(2)    | 7(2)     | 23(2)    | 13(2)    |
| C(24) | 30(2)    | 22(2)    | 18(2)    | -3(1)    | -2(1)    | 2(1)     |

|       |       |       |       |       |        |       |
|-------|-------|-------|-------|-------|--------|-------|
| C(25) | 47(2) | 21(2) | 29(2) | -7(1) | -5(2)  | 5(2)  |
| C(26) | 46(3) | 38(2) | 18(2) | -1(2) | -5(2)  | 8(2)  |
| C(27) | 32(2) | 39(2) | 28(2) | -2(2) | 8(2)   | 4(2)  |
| C(28) | 21(2) | 25(2) | 18(2) | 5(1)  | -4(1)  | 0(1)  |
| C(29) | 27(2) | 34(2) | 44(2) | 8(2)  | -10(2) | -8(2) |
| C(30) | 24(2) | 37(2) | 27(2) | 9(2)  | -3(2)  | 6(2)  |
| C(31) | 26(2) | 47(2) | 22(2) | 6(2)  | 4(1)   | 5(2)  |

---

Table G6. Hydrogen coordinates ( $\times 10^4$ ) and isotropic displacement parameters ( $\text{\AA}^2 \times 10^{-3}$ ) for (**<sup>t</sup>Bu<sub>x</sub>anPOP**)Rh(**H**).

|        | x        | y      | z        | U(eq)  |
|--------|----------|--------|----------|--------|
| H(1)   | 7580(30) | 572(9) | 5950(20) | 29(11) |
| H(3)   | 10468    | 1810   | 7436     | 34     |
| H(4)   | 10900    | 2930   | 7598     | 41     |
| H(5)   | 10086    | 3813   | 7163     | 34     |
| H(9)   | 8095     | 4496   | 5370     | 33     |
| H(10)  | 7420     | 4120   | 4419     | 35     |
| H(11)  | 7004     | 2993   | 4317     | 29     |
| H(14A) | 9449     | 4497   | 6133     | 53     |
| H(14B) | 9190     | 4608   | 6881     | 53     |
| H(14C) | 8522     | 4825   | 6317     | 53     |
| H(15A) | 7334     | 4130   | 6798     | 51     |
| H(15B) | 7980     | 3934   | 7383     | 51     |
| H(15C) | 7503     | 3349   | 6974     | 51     |
| H(17A) | 8931     | -157   | 6248     | 87     |
| H(17B) | 9411     | -313   | 6925     | 87     |
| H(17C) | 9913     | -443   | 6252     | 87     |
| H(18A) | 11080    | 219    | 6740     | 101    |
| H(18B) | 10571    | 545    | 7346     | 101    |
| H(18C) | 10994    | 1027   | 6802     | 101    |
| H(19A) | 10485    | 469    | 5619     | 79     |
| H(19B) | 10295    | 1244   | 5807     | 79     |
| H(19C) | 9518     | 774    | 5542     | 79     |
| H(21A) | 8327     | -53    | 7528     | 54     |
| H(21B) | 7523     | 404    | 7284     | 54     |
| H(21C) | 7689     | 298    | 8048     | 54     |
| H(22A) | 9669     | 1254   | 8149     | 67     |
| H(22B) | 9595     | 450    | 8047     | 67     |

|        |      |      |      |    |
|--------|------|------|------|----|
| H(22C) | 8993 | 821  | 8577 | 67 |
| H(23A) | 7723 | 1505 | 8243 | 70 |
| H(23B) | 7541 | 1655 | 7489 | 70 |
| H(23C) | 8366 | 1994 | 7844 | 70 |
| H(25A) | 6979 | 466  | 4420 | 48 |
| H(25B) | 7921 | 512  | 4760 | 48 |
| H(25C) | 7848 | 458  | 3984 | 48 |
| H(26A) | 6946 | 2115 | 3709 | 51 |
| H(26B) | 6385 | 1435 | 3806 | 51 |
| H(26C) | 7234 | 1429 | 3349 | 51 |
| H(27A) | 8744 | 1445 | 3853 | 49 |
| H(27B) | 8832 | 1588 | 4618 | 49 |
| H(27C) | 8476 | 2171 | 4143 | 49 |
| H(29A) | 4942 | 1110 | 5262 | 52 |
| H(29B) | 5872 | 791  | 5452 | 52 |
| H(29C) | 5643 | 941  | 4705 | 52 |
| H(30A) | 5591 | 2190 | 4316 | 44 |
| H(30B) | 5667 | 2773 | 4857 | 44 |
| H(30C) | 4836 | 2277 | 4850 | 44 |
| H(31A) | 5164 | 2079 | 6013 | 47 |
| H(31B) | 6044 | 2520 | 5978 | 47 |
| H(31C) | 6078 | 1752 | 6232 | 47 |

---

Table G7. Torsion angles [°] for (<sup>t</sup>Bu<sub>xan</sub>POP)Rh(H).

|                       |             |                         |           |
|-----------------------|-------------|-------------------------|-----------|
| O(1)-Rh(1)-P(1)-C(2)  | -9.15(13)   | C(1)-C(2)-C(3)-C(4)     | 0.2(5)    |
| P(2)-Rh(1)-P(1)-C(2)  | 37.75(16)   | P(1)-C(2)-C(3)-C(4)     | -171.5(3) |
| O(1)-Rh(1)-P(1)-C(16) | -123.37(14) | C(2)-C(3)-C(4)-C(5)     | 2.0(6)    |
| P(2)-Rh(1)-P(1)-C(16) | -76.47(17)  | C(3)-C(4)-C(5)-C(6)     | -1.1(6)   |
| O(1)-Rh(1)-P(1)-C(20) | 99.89(14)   | C(4)-C(5)-C(6)-C(1)     | -1.9(5)   |
| P(2)-Rh(1)-P(1)-C(20) | 146.80(15)  | C(4)-C(5)-C(6)-C(7)     | 172.1(4)  |
| O(1)-Rh(1)-P(2)-C(12) | 6.31(13)    | O(1)-C(1)-C(6)-C(5)     | -179.0(3) |
| P(1)-Rh(1)-P(2)-C(12) | -40.56(16)  | C(2)-C(1)-C(6)-C(5)     | 4.3(5)    |
| O(1)-Rh(1)-P(2)-C(28) | -103.63(14) | O(1)-C(1)-C(6)-C(7)     | 6.6(4)    |
| P(1)-Rh(1)-P(2)-C(28) | -150.51(15) | C(2)-C(1)-C(6)-C(7)     | -170.1(3) |
| O(1)-Rh(1)-P(2)-C(24) | 119.51(15)  | C(5)-C(6)-C(7)-C(8)     | 148.2(3)  |
| P(1)-Rh(1)-P(2)-C(24) | 72.64(17)   | C(1)-C(6)-C(7)-C(8)     | -37.8(4)  |
| P(1)-Rh(1)-O(1)-C(1)  | 7.7(2)      | C(5)-C(6)-C(7)-C(14)    | 22.6(5)   |
| P(2)-Rh(1)-O(1)-C(1)  | -159.3(2)   | C(1)-C(6)-C(7)-C(14)    | -163.4(3) |
| P(1)-Rh(1)-O(1)-C(13) | 161.2(2)    | C(5)-C(6)-C(7)-C(15)    | -96.7(4)  |
| P(2)-Rh(1)-O(1)-C(13) | -5.9(2)     | C(1)-C(6)-C(7)-C(15)    | 77.3(4)   |
| C(13)-O(1)-C(1)-C(6)  | 28.1(4)     | C(6)-C(7)-C(8)-C(13)    | 38.6(4)   |
| Rh(1)-O(1)-C(1)-C(6)  | -178.4(2)   | C(14)-C(7)-C(8)-C(13)   | 164.9(3)  |
| C(13)-O(1)-C(1)-C(2)  | -154.9(3)   | C(15)-C(7)-C(8)-C(13)   | -76.5(4)  |
| Rh(1)-O(1)-C(1)-C(2)  | -1.5(4)     | C(6)-C(7)-C(8)-C(9)     | -148.3(3) |
| O(1)-C(1)-C(2)-C(3)   | 179.7(3)    | C(14)-C(7)-C(8)-C(9)    | -22.0(5)  |
| C(6)-C(1)-C(2)-C(3)   | -3.5(5)     | C(15)-C(7)-C(8)-C(9)    | 96.6(4)   |
| O(1)-C(1)-C(2)-P(1)   | -7.9(4)     | C(13)-C(8)-C(9)-C(10)   | 0.4(6)    |
| C(6)-C(1)-C(2)-P(1)   | 168.9(3)    | C(7)-C(8)-C(9)-C(10)    | -172.8(4) |
| C(16)-P(1)-C(2)-C(3)  | -55.4(4)    | C(8)-C(9)-C(10)-C(11)   | 3.3(6)    |
| C(20)-P(1)-C(2)-C(3)  | 62.5(3)     | C(9)-C(10)-C(11)-C(12)  | -2.8(6)   |
| Rh(1)-P(1)-C(2)-C(3)  | -176.0(3)   | C(10)-C(11)-C(12)-C(13) | -1.4(5)   |
| C(16)-P(1)-C(2)-C(1)  | 133.0(3)    | C(10)-C(11)-C(12)-P(2)  | 176.2(3)  |
| C(20)-P(1)-C(2)-C(1)  | -109.1(3)   | C(28)-P(2)-C(12)-C(13)  | 112.7(3)  |
| Rh(1)-P(1)-C(2)-C(1)  | 12.4(3)     | C(24)-P(2)-C(12)-C(13)  | -130.0(3) |

|                        |           |                        |           |
|------------------------|-----------|------------------------|-----------|
| Rh(1)-P(2)-C(12)-C(13) | -8.1(3)   | C(16)-P(1)-C(20)-C(22) | 44.2(4)   |
| C(28)-P(2)-C(12)-C(11) | -64.8(3)  | Rh(1)-P(1)-C(20)-C(22) | -178.1(3) |
| C(24)-P(2)-C(12)-C(11) | 52.6(3)   | C(12)-P(2)-C(24)-C(26) | -78.1(3)  |
| Rh(1)-P(2)-C(12)-C(11) | 174.5(3)  | C(28)-P(2)-C(24)-C(26) | 32.4(3)   |
| C(9)-C(8)-C(13)-C(12)  | -4.9(5)   | Rh(1)-P(2)-C(24)-C(26) | 171.1(2)  |
| C(7)-C(8)-C(13)-C(12)  | 168.6(3)  | C(12)-P(2)-C(24)-C(27) | 45.7(3)   |
| C(9)-C(8)-C(13)-O(1)   | 178.3(3)  | C(28)-P(2)-C(24)-C(27) | 156.1(2)  |
| C(7)-C(8)-C(13)-O(1)   | -8.2(5)   | Rh(1)-P(2)-C(24)-C(27) | -65.1(3)  |
| C(11)-C(12)-C(13)-C(8) | 5.3(5)    | C(12)-P(2)-C(24)-C(25) | 160.5(3)  |
| P(2)-C(12)-C(13)-C(8)  | -172.4(3) | C(28)-P(2)-C(24)-C(25) | -89.1(3)  |
| C(11)-C(12)-C(13)-O(1) | -177.9(3) | Rh(1)-P(2)-C(24)-C(25) | 49.7(3)   |
| P(2)-C(12)-C(13)-O(1)  | 4.5(4)    | C(12)-P(2)-C(28)-C(30) | 49.1(3)   |
| C(1)-O(1)-C(13)-C(8)   | -27.4(4)  | C(24)-P(2)-C(28)-C(30) | -63.0(3)  |
| Rh(1)-O(1)-C(13)-C(8)  | 179.1(2)  | Rh(1)-P(2)-C(28)-C(30) | 158.2(2)  |
| C(1)-O(1)-C(13)-C(12)  | 155.6(3)  | C(12)-P(2)-C(28)-C(29) | 175.3(2)  |
| Rh(1)-O(1)-C(13)-C(12) | 2.1(4)    | C(24)-P(2)-C(28)-C(29) | 63.2(3)   |
| C(2)-P(1)-C(16)-C(19)  | -69.6(3)  | Rh(1)-P(2)-C(28)-C(29) | -75.6(3)  |
| C(20)-P(1)-C(16)-C(19) | -179.5(3) | C(12)-P(2)-C(28)-C(31) | -69.4(3)  |
| Rh(1)-P(1)-C(16)-C(19) | 41.6(3)   | C(24)-P(2)-C(28)-C(31) | 178.5(2)  |
| C(2)-P(1)-C(16)-C(17)  | 174.7(3)  | Rh(1)-P(2)-C(28)-C(31) | 39.7(3)   |
| C(20)-P(1)-C(16)-C(17) | 64.7(4)   |                        |           |
| Rh(1)-P(1)-C(16)-C(17) | -74.1(4)  |                        |           |
| C(2)-P(1)-C(16)-C(18)  | 49.8(4)   |                        |           |
| C(20)-P(1)-C(16)-C(18) | -60.2(4)  |                        |           |
| Rh(1)-P(1)-C(16)-C(18) | 160.9(4)  |                        |           |
| C(2)-P(1)-C(20)-C(21)  | 168.5(3)  |                        |           |
| C(16)-P(1)-C(20)-C(21) | -78.4(3)  |                        |           |
| Rh(1)-P(1)-C(20)-C(21) | 59.4(3)   |                        |           |
| C(2)-P(1)-C(20)-C(23)  | 53.4(3)   |                        |           |
| C(16)-P(1)-C(20)-C(23) | 166.6(3)  |                        |           |
| Rh(1)-P(1)-C(20)-C(23) | -55.7(3)  |                        |           |
| C(2)-P(1)-C(20)-C(22)  | -69.0(3)  |                        |           |
